# Supplementary material for: Genome-wide miRNA expression profiling in potato (Solanum tuberosum L.) reveals TOR-dependent post-transcriptional gene regulatory networks in diverse metabolic pathway
Source: PeerJ. 2021 Jan 14;9:e10704. doi: 10.7717/peerj.10704 (PMC7811781; doi:10.7717/peerj.10704)
Supplement: Supplemental Information 2 [file peerj-09-10704-s002.xlsx]

## Sheet: Sheet1
Supplementary Table 15 The primers used in this study.
miRNAs	miRNA-specific primers	Target gene ID	gene-specific primers (Forward）	gene-specific primers （Reverse）
stu-miR8010	ATAGGACCCTAGTTAAATTTAG	PGSC0003DMG400026112	CCAGCATCAGAATCTACACC	GACTGGTACGACCAAAGTGA
stu-miR5303c	TTTTGGAGAATCCGACACGCAC	PGSC0003DMG400028214	ATTTGAACTTCCAACGCCCACT	ATCACCCTCACGCATCTCCC
stu-miR6023	TTCCATGAAAGTGTTTTTGGAT	PGSC0003DMG400008584	TTCACCGTGATACAGATAGAGC	CAAACAGTTATAGAAGCCGTGG
stu-miR1886i	TTTACGTTGATTTCATCTCAT	PGSC0003DMG400023703	GAATCCGACCCGAATGTTAAAG	CTACGAAAAAGAACCCATGTGG
stu-miR7985	CGGGCTTGCCTAGAACGGGTT	PGSC0003DMG402018257	GAGATATGGAAATATGGAGGAG	TTCCCAACAAATAATGAAGC
stu-miR3627	TCGCAGGAGAGATGGCACTTAG	PGSC0003DMG401025397	GCTTGTTGTGTTTTCCTTGTTG	CTTCTTTTACCACTTGCCCTTC
Reference
Actin	GCTTCCCGATGGTCAAGTCA	GGATTCCAGCTGCTTCCATTC
