# Supplementary material for: Genome-wide miRNA expression profiling in potato (Solanum tuberosum L.) reveals TOR-dependent post-transcriptional gene regulatory networks in diverse metabolic pathway
Source: PeerJ. 2021 Jan 14;9:e10704. doi: 10.7717/peerj.10704 (PMC7811781; doi:10.7717/peerj.10704)
Supplement: Supplemental Information 5 [file peerj-09-10704-s005.xls]

## Sheet: Sheet1
Table S4 The TPM of all the identified miRNA
miRNA	DMSO	RAP + KU
novel_111	6.748	0
novel_154	6.748	0
stu-miR169a-3p	6.748	0
stu-miR1886h	6.748	0
stu-miR1886i-3p	6.748	0
stu-miR477a-3p	6.748	0
stu-miR7979	6.748	0
stu-miR7986	6.748	0
stu-miR7987	6.748	0
stu-miR7998	6.748	0
stu-miR8004	6.748	0
stu-miR8015-3p	6.748	0
stu-miR8023	6.748	0
stu-miR8034	6.748	0
stu-miR8041a-5p	6.748	0
stu-miR8045	6.748	0
stu-miR8050-5p	6.748	0
stu-miR156f-3p	13.496	0
stu-miR7985	13.496	0
stu-miR8013	13.496	0
stu-miR3627-5p	33.74	0
novel_182	0	8.43263
stu-miR166c-5p	0	8.43263
stu-miR167a-3p	0	8.43263
stu-miR3627-3p	0	8.43263
stu-miR399g-3p	0	8.43263
stu-miR5304-3p	0	8.43263
stu-miR6023	0	8.43263
stu-miR7983-5p	0	8.43263
stu-miR7990b	0	8.43263
stu-miR8001b-3p	0	8.43263
stu-miR8011a-3p	0	8.43263
stu-miR8012	0	8.43263
stu-miR8014-3p	0	8.43263
stu-miR8018	0	8.43263
stu-miR8024a-5p	0	8.43263
stu-miR8048-3p	0	8.43263
novel_145	6.748	8.43263
novel_64	6.748	8.43263
stu-miR399j-5p	6.748	8.43263
stu-miR7988	6.748	8.43263
stu-miR7993a	6.748	8.43263
stu-miR8021	6.748	8.43263
stu-miR8025-3p	6.748	8.43263
stu-miR8042	6.748	8.43263
novel_94	13.496	8.43263
stu-miR393-3p	13.496	8.43263
stu-miR8011a-5p	13.496	8.43263
stu-miR8046-3p	13.496	8.43263
stu-miR399a-5p	20.244	8.43263
stu-miR7980b-5p	20.244	8.43263
stu-miR164-5p	26.992	8.43263
stu-miR7991a	26.992	8.43263
stu-miR8007a-3p	26.992	8.43263
stu-miR169f-3p	33.74	8.43263
stu-miR171d-5p	33.74	8.43263
stu-miR8032b-3p	33.74	8.43263
stu-miR5303j	40.488	8.43263
stu-miR7984c-3p	40.488	8.43263
stu-miR7122-5p	101.22	8.43263
stu-miR5303c	0	16.8653
stu-miR8028-5p	0	16.8653
stu-miR8033-3p	6.748	16.8653
stu-miR1886g-5p	13.496	16.8653
stu-miR399i-3p	13.496	16.8653
stu-miR8049-3p	13.496	16.8653
stu-miR7992-3p	20.244	16.8653
stu-miR482b-5p	26.992	16.8653
stu-miR8003	33.74	16.8653
stu-miR8010	0	25.2979
stu-miR8024a-3p	0	25.2979
stu-miR172b-5p	13.496	25.2979
stu-miR393-5p	13.496	25.2979
stu-miR5303e	13.496	25.2979
stu-miR5303f	13.496	25.2979
stu-miR8038a-3p	20.244	25.2979
stu-miR8015-5p	33.74	25.2979
stu-miR169d-3p	40.488	25.2979
stu-miR398b-3p	47.236	25.2979
novel_138	53.984	25.2979
novel_162	67.48	25.2979
stu-miR7997a	67.48	25.2979
stu-miR8038a-5p	74.228	25.2979
stu-miR5304-5p	6.748	33.7305
stu-miR7995	6.748	33.7305
stu-miR8008b	6.748	33.7305
stu-miR8020	13.496	33.7305
novel_189	33.74	33.7305
stu-miR477a-5p	33.74	33.7305
novel_133	40.488	33.7305
novel_152	47.236	33.7305
stu-miR172d-5p	87.724	33.7305
stu-miR8025-5p	13.496	42.1631
novel_53	20.244	42.1631
stu-miR172c-3p	20.244	42.1631
novel_192	26.992	42.1631
stu-miR408a-5p	33.74	42.1631
novel_173	47.236	42.1631
stu-miR8008a	47.236	42.1631
novel_194	60.732	42.1631
novel_139	74.228	42.1631
novel_170	74.228	42.1631
novel_149	80.976	42.1631
novel_193	101.22	42.1631
stu-miR8030-5p	13.496	50.5958
stu-miR7984c-5p	33.74	50.5958
novel_168	47.236	50.5958
stu-miR827-5p	60.732	50.5958
stu-miR8007b-5p	74.228	50.5958
stu-miR8036-5p	80.976	50.5958
stu-miR5303g	107.968	50.5958
stu-miR5303h	121.464	50.5958
novel_120	202.44	50.5958
novel_151	33.74	59.0284
stu-miR6024-5p	47.236	59.0284
stu-miR8043	47.236	59.0284
novel_92	60.732	59.0284
stu-miR479	94.472	59.0284
stu-miR8006-5p	101.22	59.0284
novel_117	26.992	67.461
novel_150	47.236	67.461
stu-miR8046-5p	101.22	67.461
novel_116	161.952	67.461
novel_161	20.244	75.8936
stu-miR7996a	53.984	75.8936
novel_124	67.48	75.8936
novel_136	80.976	75.8936
novel_83	94.472	75.8936
novel_61	114.716	75.8936
stu-miR7122-3p	53.984	84.3263
novel_130	60.732	84.3263
novel_156	74.228	84.3263
novel_195	74.228	84.3263
stu-miR1886a	101.22	84.3263
novel_178	121.464	84.3263
novel_106	161.952	84.3263
novel_115	47.236	92.7589
stu-miR167b-3p	60.732	92.7589
stu-miR171b-5p	134.96	92.7589
stu-miR6149-3p	134.96	92.7589
novel_93	256.424	92.7589
novel_99	53.984	101.192
novel_165	74.228	101.192
novel_148	87.724	101.192
stu-miR8007a-5p	87.724	101.192
stu-miR7980b-3p	107.968	101.192
stu-miR7983-3p	128.212	101.192
stu-miR7994a	161.952	101.192
novel_103	587.076	101.192
stu-miR160a-3p	107.968	109.624
novel_171	121.464	109.624
stu-miR162a-5p	222.684	109.624
stu-miR171c-3p	80.976	118.057
stu-miR482d-5p	134.96	134.922
stu-miR7997c	256.424	134.922
stu-miR8031	74.228	143.355
novel_98	87.724	143.355
stu-miR7981-3p	94.472	143.355
stu-miR7984d-5p	107.968	151.787
novel_128	114.716	151.787
stu-miR8026	175.448	151.787
novel_96	310.408	151.787
stu-miR8044-3p	101.22	160.22
stu-miR8001a	121.464	160.22
novel_110	310.408	160.22
stu-miR8032a-5p	74.228	168.653
novel_119	175.448	168.653
stu-miR164-3p	222.684	168.653
stu-miR827-3p	303.66	168.653
stu-miR477b-3p	330.652	168.653
stu-miR166d-5p	128.212	177.085
novel_63	168.7	177.085
stu-miR390-5p	222.684	177.085
stu-miR8039	256.424	177.085
novel_108	391.384	177.085
stu-miR8041a-3p	155.204	185.518
novel_144	215.936	185.518
stu-miR8050-3p	229.432	185.518
stu-miR167d-3p	209.188	193.95
novel_105	276.668	193.95
stu-miR171d-3p	249.676	202.383
stu-miR8001b-5p	310.408	202.383
stu-miR397-3p	668.052	202.383
novel_121	182.196	210.816
novel_143	188.944	210.816
stu-miR399j-3p	60.732	219.248
novel_180	168.7	244.546
novel_163	155.204	252.979
stu-miR399a-3p	94.472	261.411
stu-miR8044-5p	411.628	261.411
stu-miR8019-3p	290.164	269.844
novel_160	195.692	286.709
stu-miR7992-5p	276.668	295.142
stu-miR8033-5p	310.408	295.142
stu-miR167c-3p	404.88	312.007
stu-miR482a-5p	249.676	320.44
stu-miR156g-3p	283.416	328.872
stu-miR4376-3p	161.952	337.305
stu-miR156h-3p	364.392	362.603
stu-miR8016	465.612	396.333
stu-miR390-3p	573.58	396.333
stu-miR7984a	384.636	404.766
novel_68	715.288	404.766
stu-miR7984d-3p	445.368	413.199
stu-miR408a-3p	418.376	480.66
stu-miR477b-5p	836.752	489.092
stu-miR172d-3p	627.564	497.525
stu-miR482e-5p	526.344	505.958
stu-miR408b-5p	1241.63	590.284
novel_69	614.068	624.014
stu-miR171b-3p	458.864	632.447
novel_142	546.588	657.745
novel_84	796.264	674.61
stu-miR160a-5p	836.752	699.908
novel_137	924.476	708.341
novel_58	553.336	969.752
novel_67	1457.57	1003.48
novel_62	1268.62	1079.38
stu-miR530	769.272	1146.84
novel_60	1315.86	1163.7
stu-miR396-3p	1322.61	1222.73
novel_59	2010.9	1366.09
stu-miR6026-3p	1835.46	1753.99
stu-miR4376-5p	1929.93	2065.99
novel_38	2172.86	2158.75
novel_56	2962.37	2361.14
stu-miR6025	3920.59	2411.73
stu-miR171a-3p	2570.99	2580.38
stu-miR319a-5p	2307.82	2588.82
stu-miR1919-3p	2969.12	2732.17
stu-miR397-5p	3083.84	2833.36
stu-miR398a-5p	6208.16	3044.18
stu-miR156f-5p	2449.52	3558.57
stu-miR166a-5p	4642.63	4047.66
novel_15	6343.12	4106.69
stu-miR319-3p	3299.77	4250.04
stu-miR172b-3p	2753.19	4258.48
stu-miR167c-5p	5715.56	4275.34
stu-miR8036-3p	7672.48	4646.38
novel_36	2597.98	4840.33
novel_34	4797.83	5093.31
stu-miR171a-5p	7274.35	5405.31
novel_40	6923.45	5607.7
stu-miR482b-3p	10857.5	5717.32
stu-miR156e	5061	6063.06
stu-miR6024-3p	7152.88	6147.39
novel_30	5155.47	6181.12
stu-miR482d-3p	8941.1	6560.58
stu-miR408b-3p	5661.57	6628.05
novel_18	11174.7	7074.97
stu-miR6027	12409.6	7943.54
stu-miR6149-5p	12193.6	8955.45
stu-miR395a	10297.5	9351.78
stu-miR384-5p	5789.79	10195
stu-miR482c	19434.2	10987.7
stu-miR482e-3p	16667.6	11333.5
stu-miR156d-3p	15142.5	11443.1
stu-miR156a	13307.1	12193.6
stu-miR1919-5p	11491.8	14158.4
novel_17	13684.9	18290.4
novel_16	29212.1	18627.7
stu-miR482a-3p	29610.2	19327.6
stu-miR319b	8077.36	30829.7
stu-miR398a-3p	77959.7	32313.8
stu-miR6022	32376.9	36150.7
stu-miR162a-3p	73607.2	40898.2
stu-miR396-5p	34799.4	45384.4
novel_1	61912.9	45494
novel_188	74896.1	51076.4
stu-miR166b	75307.7	87117.5
stu-miR166a-3p	107887	124997
stu-miR319a-3p	88945.4	202383
