# Supplementary material for: Genome-wide miRNA expression profiling in potato (Solanum tuberosum L.) reveals TOR-dependent post-transcriptional gene regulatory networks in diverse metabolic pathway
Source: PeerJ. 2021 Jan 14;9:e10704. doi: 10.7717/peerj.10704 (PMC7811781; doi:10.7717/peerj.10704)
Supplement: Supplemental Information 6 [file peerj-09-10704-s006.xls]

## Sheet: Sheet1
Table S5 The identified miRNA and their putative targets
miRNA	putative target
novel_53	PGSC0003DMG400011433
novel_53	PGSC0003DMG400021902
novel_53	PGSC0003DMG400022824
novel_53	PGSC0003DMG400023260
novel_53	PGSC0003DMG400024527
novel_53	PGSC0003DMG400026736
novel_53	PGSC0003DMG400028308
novel_53	PGSC0003DMG400032817
novel_53	PGSC0003DMG400034310
novel_53	PGSC0003DMG401029709
novel_64	PGSC0003DMG400028308
novel_94	EPlSTUG00000000346
novel_94	EPlSTUG00000003293
novel_94	PGSC0003DMG400000404
novel_94	PGSC0003DMG400012403
novel_94	PGSC0003DMG400019523
novel_94	PGSC0003DMG400022134
novel_94	PGSC0003DMG400022904
novel_94	PGSC0003DMG400025257
novel_94	PGSC0003DMG401011377
novel_94	PGSC0003DMG402011335
novel_94	PGSC0003DMG402011377
stu-miR156a	EPlSTUG00000000573
stu-miR156a	EPlSTUG00000000584
stu-miR156a	EPlSTUG00000000791
stu-miR156a	EPlSTUG00000001300
stu-miR156a	EPlSTUG00000001439
stu-miR156a	EPlSTUG00000002113
stu-miR156a	EPlSTUG00000002136
stu-miR156a	EPlSTUG00000002343
stu-miR156a	PGSC0003DMG400001459
stu-miR156a	PGSC0003DMG400003084
stu-miR156a	PGSC0003DMG400003415
stu-miR156a	PGSC0003DMG400005775
stu-miR156a	PGSC0003DMG400006969
stu-miR156a	PGSC0003DMG400008777
stu-miR156a	PGSC0003DMG400009180
stu-miR156a	PGSC0003DMG400009279
stu-miR156a	PGSC0003DMG400009315
stu-miR156a	PGSC0003DMG400009862
stu-miR156a	PGSC0003DMG400010324
stu-miR156a	PGSC0003DMG400010715
stu-miR156a	PGSC0003DMG400011433
stu-miR156a	PGSC0003DMG400014497
stu-miR156a	PGSC0003DMG400015408
stu-miR156a	PGSC0003DMG400016996
stu-miR156a	PGSC0003DMG400019289
stu-miR156a	PGSC0003DMG400021902
stu-miR156a	PGSC0003DMG400022824
stu-miR156a	PGSC0003DMG400022955
stu-miR156a	PGSC0003DMG400023260
stu-miR156a	PGSC0003DMG400024527
stu-miR156a	PGSC0003DMG400025734
stu-miR156a	PGSC0003DMG400026736
stu-miR156a	PGSC0003DMG400027048
stu-miR156a	PGSC0003DMG400028308
stu-miR156a	PGSC0003DMG400029627
stu-miR156a	PGSC0003DMG400029897
stu-miR156a	PGSC0003DMG400030144
stu-miR156a	PGSC0003DMG400032817
stu-miR156a	PGSC0003DMG400034310
stu-miR156a	PGSC0003DMG400044028
stu-miR156a	PGSC0003DMG401005640
stu-miR156a	PGSC0003DMG401029709
stu-miR156d-3p	PGSC0003DMG400027376
stu-miR156d-3p	PGSC0003DMG400030101
stu-miR156e	EPlSTUG00000000573
stu-miR156e	EPlSTUG00000000584
stu-miR156e	EPlSTUG00000000791
stu-miR156e	EPlSTUG00000001300
stu-miR156e	EPlSTUG00000001439
stu-miR156e	EPlSTUG00000002113
stu-miR156e	EPlSTUG00000002136
stu-miR156e	EPlSTUG00000002343
stu-miR156e	EPlSTUG00000003098
stu-miR156e	PGSC0003DMG400000043
stu-miR156e	PGSC0003DMG400001063
stu-miR156e	PGSC0003DMG400002352
stu-miR156e	PGSC0003DMG400003069
stu-miR156e	PGSC0003DMG400003084
stu-miR156e	PGSC0003DMG400003110
stu-miR156e	PGSC0003DMG400003450
stu-miR156e	PGSC0003DMG400003543
stu-miR156e	PGSC0003DMG400003809
stu-miR156e	PGSC0003DMG400007862
stu-miR156e	PGSC0003DMG400008999
stu-miR156e	PGSC0003DMG400010156
stu-miR156e	PGSC0003DMG400010634
stu-miR156e	PGSC0003DMG400011433
stu-miR156e	PGSC0003DMG400011531
stu-miR156e	PGSC0003DMG400012555
stu-miR156e	PGSC0003DMG400013236
stu-miR156e	PGSC0003DMG400015000
stu-miR156e	PGSC0003DMG400015408
stu-miR156e	PGSC0003DMG400016053
stu-miR156e	PGSC0003DMG400016481
stu-miR156e	PGSC0003DMG400016519
stu-miR156e	PGSC0003DMG400017484
stu-miR156e	PGSC0003DMG400017531
stu-miR156e	PGSC0003DMG400018993
stu-miR156e	PGSC0003DMG400020210
stu-miR156e	PGSC0003DMG400021902
stu-miR156e	PGSC0003DMG400022824
stu-miR156e	PGSC0003DMG400023260
stu-miR156e	PGSC0003DMG400023660
stu-miR156e	PGSC0003DMG400023695
stu-miR156e	PGSC0003DMG400023962
stu-miR156e	PGSC0003DMG400024167
stu-miR156e	PGSC0003DMG400024527
stu-miR156e	PGSC0003DMG400025409
stu-miR156e	PGSC0003DMG400026556
stu-miR156e	PGSC0003DMG400026736
stu-miR156e	PGSC0003DMG400027048
stu-miR156e	PGSC0003DMG400027171
stu-miR156e	PGSC0003DMG400028120
stu-miR156e	PGSC0003DMG400028308
stu-miR156e	PGSC0003DMG400029101
stu-miR156e	PGSC0003DMG400029156
stu-miR156e	PGSC0003DMG400029647
stu-miR156e	PGSC0003DMG400032817
stu-miR156e	PGSC0003DMG400033067
stu-miR156e	PGSC0003DMG400033913
stu-miR156e	PGSC0003DMG400034310
stu-miR156e	PGSC0003DMG401004858
stu-miR156e	PGSC0003DMG401029709
stu-miR156f-3p	PGSC0003DMG400009360
stu-miR156f-3p	PGSC0003DMG400020262
stu-miR156f-3p	PGSC0003DMG400023947
stu-miR156f-3p	PGSC0003DMG400037817
stu-miR156f-3p	PGSC0003DMG401010743
stu-miR156f-5p	EPlSTUG00000000573
stu-miR156f-5p	EPlSTUG00000000584
stu-miR156f-5p	EPlSTUG00000000791
stu-miR156f-5p	EPlSTUG00000001300
stu-miR156f-5p	EPlSTUG00000001439
stu-miR156f-5p	EPlSTUG00000002113
stu-miR156f-5p	EPlSTUG00000002136
stu-miR156f-5p	EPlSTUG00000002343
stu-miR156f-5p	EPlSTUG00000003098
stu-miR156f-5p	PGSC0003DMG400000644
stu-miR156f-5p	PGSC0003DMG400002707
stu-miR156f-5p	PGSC0003DMG400003084
stu-miR156f-5p	PGSC0003DMG400003809
stu-miR156f-5p	PGSC0003DMG400003816
stu-miR156f-5p	PGSC0003DMG400004744
stu-miR156f-5p	PGSC0003DMG400008701
stu-miR156f-5p	PGSC0003DMG400011433
stu-miR156f-5p	PGSC0003DMG400011531
stu-miR156f-5p	PGSC0003DMG400012940
stu-miR156f-5p	PGSC0003DMG400013146
stu-miR156f-5p	PGSC0003DMG400013236
stu-miR156f-5p	PGSC0003DMG400015000
stu-miR156f-5p	PGSC0003DMG400015408
stu-miR156f-5p	PGSC0003DMG400015670
stu-miR156f-5p	PGSC0003DMG400016053
stu-miR156f-5p	PGSC0003DMG400016481
stu-miR156f-5p	PGSC0003DMG400016519
stu-miR156f-5p	PGSC0003DMG400017531
stu-miR156f-5p	PGSC0003DMG400017662
stu-miR156f-5p	PGSC0003DMG400020210
stu-miR156f-5p	PGSC0003DMG400021559
stu-miR156f-5p	PGSC0003DMG400021902
stu-miR156f-5p	PGSC0003DMG400022824
stu-miR156f-5p	PGSC0003DMG400023260
stu-miR156f-5p	PGSC0003DMG400023660
stu-miR156f-5p	PGSC0003DMG400023962
stu-miR156f-5p	PGSC0003DMG400024167
stu-miR156f-5p	PGSC0003DMG400024527
stu-miR156f-5p	PGSC0003DMG400024901
stu-miR156f-5p	PGSC0003DMG400026736
stu-miR156f-5p	PGSC0003DMG400027171
stu-miR156f-5p	PGSC0003DMG400028097
stu-miR156f-5p	PGSC0003DMG400028308
stu-miR156f-5p	PGSC0003DMG400029156
stu-miR156f-5p	PGSC0003DMG400029409
stu-miR156f-5p	PGSC0003DMG400029647
stu-miR156f-5p	PGSC0003DMG400030404
stu-miR156f-5p	PGSC0003DMG400031068
stu-miR156f-5p	PGSC0003DMG400032817
stu-miR156f-5p	PGSC0003DMG400034310
stu-miR156f-5p	PGSC0003DMG401004858
stu-miR156f-5p	PGSC0003DMG401029709
stu-miR156g-3p	EPlSTUG00000000791
stu-miR156g-3p	EPlSTUG00000002343
stu-miR156g-3p	PGSC0003DMG400001594
stu-miR156g-3p	PGSC0003DMG400035580
stu-miR156g-3p	PGSC0003DMG402027320
stu-miR156h-3p	EPlSTUG00000000584
stu-miR156h-3p	EPlSTUG00000001300
stu-miR156h-3p	EPlSTUG00000001439
stu-miR156h-3p	EPlSTUG00000002113
stu-miR156h-3p	EPlSTUG00000002136
stu-miR156h-3p	PGSC0003DMG400024391
stu-miR156h-3p	PGSC0003DMG400026502
stu-miR156h-3p	PGSC0003DMG400034443
stu-miR156h-3p	PGSC0003DMG400039799
stu-miR156h-3p	PGSC0003DMG400042417
stu-miR160a-3p	EPlSTUG00000000282
stu-miR160a-3p	EPlSTUG00000003831
stu-miR160a-3p	PGSC0003DMG400030104
stu-miR160a-5p	EPlSTUG00000000282
stu-miR160a-5p	EPlSTUG00000000292
stu-miR160a-5p	EPlSTUG00000001146
stu-miR160a-5p	EPlSTUG00000003831
stu-miR160a-5p	PGSC0003DMG400005305
stu-miR160a-5p	PGSC0003DMG400006939
stu-miR160a-5p	PGSC0003DMG400007029
stu-miR160a-5p	PGSC0003DMG400008081
stu-miR160a-5p	PGSC0003DMG400014507
stu-miR160a-5p	PGSC0003DMG400015477
stu-miR160a-5p	PGSC0003DMG400017585
stu-miR160a-5p	PGSC0003DMG400021560
stu-miR160a-5p	PGSC0003DMG400021598
stu-miR160a-5p	PGSC0003DMG400024320
stu-miR160a-5p	PGSC0003DMG401007028
stu-miR162a-3p	EPlSTUG00000000120
stu-miR162a-3p	EPlSTUG00000000617
stu-miR162a-3p	PGSC0003DMG400005293
stu-miR162a-3p	PGSC0003DMG400012703
stu-miR162a-3p	PGSC0003DMG400015776
stu-miR162a-3p	PGSC0003DMG400038916
stu-miR162a-5p	EPlSTUG00000000120
stu-miR162a-5p	EPlSTUG00000000617
stu-miR162a-5p	PGSC0003DMG400016131
stu-miR162a-5p	PGSC0003DMG400018042
stu-miR162a-5p	PGSC0003DMG400022599
stu-miR164-3p	EPlSTUG00000003293
stu-miR164-3p	PGSC0003DMG400011153
stu-miR164-3p	PGSC0003DMG400015906
stu-miR164-3p	PGSC0003DMG400029755
stu-miR164-3p	PGSC0003DMG400039208
stu-miR164-3p	PGSC0003DMG400041080
stu-miR164-5p	EPlSTUG00000000346
stu-miR164-5p	EPlSTUG00000003293
stu-miR164-5p	PGSC0003DMG400002290
stu-miR164-5p	PGSC0003DMG400009936
stu-miR164-5p	PGSC0003DMG400012403
stu-miR164-5p	PGSC0003DMG400015007
stu-miR164-5p	PGSC0003DMG400019523
stu-miR164-5p	PGSC0003DMG400022134
stu-miR164-5p	PGSC0003DMG400022904
stu-miR164-5p	PGSC0003DMG400025982
stu-miR164-5p	PGSC0003DMG400027950
stu-miR164-5p	PGSC0003DMG400033047
stu-miR164-5p	PGSC0003DMG402029631
stu-miR164-5p	PGSC0003DMG404020840
stu-miR166a-3p	EPlSTUG00000000293
stu-miR166a-3p	EPlSTUG00000001648
stu-miR166a-3p	EPlSTUG00000002074
stu-miR166a-3p	EPlSTUG00000002191
stu-miR166a-3p	EPlSTUG00000002384
stu-miR166a-3p	EPlSTUG00000003788
stu-miR166a-3p	EPlSTUG00000003900
stu-miR166a-5p	EPlSTUG00000000293
stu-miR166a-5p	EPlSTUG00000001648
stu-miR166a-5p	EPlSTUG00000002074
stu-miR166a-5p	EPlSTUG00000002191
stu-miR166a-5p	EPlSTUG00000002384
stu-miR166a-5p	EPlSTUG00000003788
stu-miR166a-5p	EPlSTUG00000003900
stu-miR166a-5p	PGSC0003DMG400025890
stu-miR166a-5p	PGSC0003DMG400031207
stu-miR166a-5p	PGSC0003DMG402005482
stu-miR166b	EPlSTUG00000000293
stu-miR166b	EPlSTUG00000001648
stu-miR166b	EPlSTUG00000002074
stu-miR166b	EPlSTUG00000002191
stu-miR166b	EPlSTUG00000002384
stu-miR166b	EPlSTUG00000003788
stu-miR166b	EPlSTUG00000003900
stu-miR166c-5p	EPlSTUG00000000293
stu-miR166c-5p	EPlSTUG00000001648
stu-miR166c-5p	EPlSTUG00000002074
stu-miR166c-5p	EPlSTUG00000002191
stu-miR166c-5p	EPlSTUG00000002384
stu-miR166c-5p	EPlSTUG00000003788
stu-miR166c-5p	EPlSTUG00000003900
stu-miR166c-5p	PGSC0003DMG400004146
stu-miR166c-5p	PGSC0003DMG400009144
stu-miR166c-5p	PGSC0003DMG400011509
stu-miR166c-5p	PGSC0003DMG400019465
stu-miR166c-5p	PGSC0003DMG400021582
stu-miR166c-5p	PGSC0003DMG400029988
stu-miR166c-5p	PGSC0003DMG400040347
stu-miR166d-5p	EPlSTUG00000000293
stu-miR166d-5p	EPlSTUG00000001648
stu-miR166d-5p	EPlSTUG00000002191
stu-miR166d-5p	EPlSTUG00000003788
stu-miR166d-5p	EPlSTUG00000003900
stu-miR166d-5p	PGSC0003DMG400012335
stu-miR166d-5p	PGSC0003DMG400014799
stu-miR166d-5p	PGSC0003DMG400018825
stu-miR166d-5p	PGSC0003DMG402030235
stu-miR167a-3p	EPlSTUG00000003922
stu-miR167a-3p	EPlSTUG00000003987
stu-miR167b-3p	EPlSTUG00000003922
stu-miR167b-3p	EPlSTUG00000003987
stu-miR167b-3p	PGSC0003DMG400003679
stu-miR167b-3p	PGSC0003DMG400012253
stu-miR167b-3p	PGSC0003DMG400028642
stu-miR167b-3p	PGSC0003DMG400042059
stu-miR167b-3p	PGSC0003DMG400044293
stu-miR167c-3p	EPlSTUG00000000375
stu-miR167c-5p	EPlSTUG00000000375
stu-miR167c-5p	EPlSTUG00000000644
stu-miR167c-5p	EPlSTUG00000003922
stu-miR167c-5p	EPlSTUG00000003987
stu-miR167c-5p	PGSC0003DMG400002985
stu-miR167c-5p	PGSC0003DMG400005252
stu-miR167c-5p	PGSC0003DMG400023474
stu-miR167c-5p	PGSC0003DMG400025273
stu-miR167c-5p	PGSC0003DMG400029945
stu-miR167c-5p	PGSC0003DMG400031222
stu-miR167c-5p	PGSC0003DMG400031356
stu-miR167c-5p	PGSC0003DMG400039210
stu-miR167d-3p	EPlSTUG00000000644
stu-miR167d-3p	EPlSTUG00000003922
stu-miR167d-3p	EPlSTUG00000003987
stu-miR167d-3p	PGSC0003DMG400003777
stu-miR167d-3p	PGSC0003DMG400005647
stu-miR167d-3p	PGSC0003DMG400012402
stu-miR167d-3p	PGSC0003DMG400027718
stu-miR167d-3p	PGSC0003DMG400036153
stu-miR167d-3p	PGSC0003DMG400038706
stu-miR167d-3p	PGSC0003DMG400038769
stu-miR167d-3p	PGSC0003DMG400039210
stu-miR167d-3p	PGSC0003DMG400042645
stu-miR167d-3p	PGSC0003DMG400043661
stu-miR167d-3p	PGSC0003DMG400044933
stu-miR167d-3p	PGSC0003DMG400044977
stu-miR167d-3p	PGSC0003DMG401006212
stu-miR167d-3p	PGSC0003DMG403023117
stu-miR169a-3p	EPlSTUG00000002119
stu-miR169a-3p	EPlSTUG00000002309
stu-miR169a-3p	EPlSTUG00000002941
stu-miR169a-3p	EPlSTUG00000002954
stu-miR169a-3p	EPlSTUG00000003143
stu-miR169a-3p	PGSC0003DMG400000079
stu-miR169a-3p	PGSC0003DMG400001437
stu-miR169a-3p	PGSC0003DMG400002038
stu-miR169a-3p	PGSC0003DMG400002990
stu-miR169a-3p	PGSC0003DMG400003138
stu-miR169a-3p	PGSC0003DMG400003393
stu-miR169a-3p	PGSC0003DMG400004101
stu-miR169a-3p	PGSC0003DMG400007555
stu-miR169a-3p	PGSC0003DMG400011558
stu-miR169a-3p	PGSC0003DMG400011914
stu-miR169a-3p	PGSC0003DMG400012044
stu-miR169a-3p	PGSC0003DMG400013288
stu-miR169a-3p	PGSC0003DMG400013308
stu-miR169a-3p	PGSC0003DMG400014128
stu-miR169a-3p	PGSC0003DMG400015480
stu-miR169a-3p	PGSC0003DMG400020269
stu-miR169a-3p	PGSC0003DMG400020891
stu-miR169a-3p	PGSC0003DMG400021750
stu-miR169a-3p	PGSC0003DMG400026042
stu-miR169a-3p	PGSC0003DMG400027154
stu-miR169a-3p	PGSC0003DMG400029442
stu-miR169a-3p	PGSC0003DMG400030899
stu-miR169a-3p	PGSC0003DMG400036408
stu-miR169a-3p	PGSC0003DMG400037680
stu-miR169a-3p	PGSC0003DMG400038108
stu-miR169a-3p	PGSC0003DMG400038614
stu-miR169a-3p	PGSC0003DMG400039182
stu-miR169a-3p	PGSC0003DMG400040220
stu-miR169a-3p	PGSC0003DMG400043378
stu-miR169a-3p	PGSC0003DMG401000198
stu-miR169a-3p	PGSC0003DMG401011522
stu-miR169a-3p	PGSC0003DMG401012873
stu-miR169a-3p	PGSC0003DMG401019059
stu-miR169a-3p	PGSC0003DMG401020240
stu-miR169a-3p	PGSC0003DMG402002917
stu-miR169a-3p	PGSC0003DMG402005306
stu-miR169a-3p	PGSC0003DMG402030350
stu-miR169d-3p	EPlSTUG00000000947
stu-miR169d-3p	EPlSTUG00000001024
stu-miR169d-3p	EPlSTUG00000001041
stu-miR169d-3p	EPlSTUG00000001343
stu-miR169d-3p	EPlSTUG00000001356
stu-miR169d-3p	EPlSTUG00000001954
stu-miR169d-3p	EPlSTUG00000002683
stu-miR169d-3p	EPlSTUG00000002828
stu-miR169d-3p	EPlSTUG00000002876
stu-miR169d-3p	EPlSTUG00000003504
stu-miR169d-3p	EPlSTUG00000003597
stu-miR169d-3p	EPlSTUG00000003609
stu-miR169d-3p	PGSC0003DMG400000936
stu-miR169d-3p	PGSC0003DMG400003454
stu-miR169d-3p	PGSC0003DMG400005177
stu-miR169d-3p	PGSC0003DMG400021428
stu-miR169d-3p	PGSC0003DMG400022111
stu-miR169d-3p	PGSC0003DMG400025887
stu-miR169d-3p	PGSC0003DMG400026983
stu-miR169d-3p	PGSC0003DMG400037454
stu-miR169f-3p	EPlSTUG00000000004
stu-miR169f-3p	EPlSTUG00000000051
stu-miR169f-3p	EPlSTUG00000000351
stu-miR169f-3p	EPlSTUG00000000354
stu-miR169f-3p	EPlSTUG00000000520
stu-miR169f-3p	EPlSTUG00000000521
stu-miR169f-3p	EPlSTUG00000000883
stu-miR169f-3p	EPlSTUG00000000948
stu-miR169f-3p	EPlSTUG00000000979
stu-miR169f-3p	EPlSTUG00000001096
stu-miR169f-3p	EPlSTUG00000001151
stu-miR169f-3p	EPlSTUG00000001544
stu-miR169f-3p	EPlSTUG00000001640
stu-miR169f-3p	EPlSTUG00000001662
stu-miR169f-3p	EPlSTUG00000001683
stu-miR169f-3p	EPlSTUG00000001931
stu-miR169f-3p	EPlSTUG00000002070
stu-miR169f-3p	EPlSTUG00000002232
stu-miR169f-3p	EPlSTUG00000002574
stu-miR169f-3p	EPlSTUG00000002685
stu-miR169f-3p	EPlSTUG00000002701
stu-miR169f-3p	EPlSTUG00000002877
stu-miR169f-3p	EPlSTUG00000002880
stu-miR169f-3p	EPlSTUG00000003256
stu-miR169f-3p	EPlSTUG00000003460
stu-miR169f-3p	EPlSTUG00000003653
stu-miR169f-3p	EPlSTUG00000003658
stu-miR169f-3p	EPlSTUG00000003824
stu-miR169f-3p	PGSC0003DMG400008518
stu-miR169f-3p	PGSC0003DMG400010257
stu-miR169f-3p	PGSC0003DMG400010372
stu-miR169f-3p	PGSC0003DMG400011307
stu-miR169f-3p	PGSC0003DMG400012200
stu-miR169f-3p	PGSC0003DMG400015540
stu-miR169f-3p	PGSC0003DMG400016625
stu-miR169f-3p	PGSC0003DMG400016669
stu-miR169f-3p	PGSC0003DMG400021101
stu-miR169f-3p	PGSC0003DMG400030343
stu-miR169f-3p	PGSC0003DMG400034418
stu-miR169f-3p	PGSC0003DMG400034631
stu-miR169f-3p	PGSC0003DMG400034784
stu-miR169f-3p	PGSC0003DMG400034813
stu-miR169f-3p	PGSC0003DMG400035136
stu-miR169f-3p	PGSC0003DMG400035659
stu-miR169f-3p	PGSC0003DMG400035737
stu-miR169f-3p	PGSC0003DMG400036148
stu-miR169f-3p	PGSC0003DMG400036169
stu-miR169f-3p	PGSC0003DMG400036198
stu-miR169f-3p	PGSC0003DMG400036777
stu-miR169f-3p	PGSC0003DMG400038410
stu-miR169f-3p	PGSC0003DMG400038585
stu-miR169f-3p	PGSC0003DMG400039639
stu-miR169f-3p	PGSC0003DMG400039727
stu-miR169f-3p	PGSC0003DMG400040228
stu-miR169f-3p	PGSC0003DMG400041001
stu-miR169f-3p	PGSC0003DMG400041098
stu-miR169f-3p	PGSC0003DMG400041108
stu-miR169f-3p	PGSC0003DMG400041720
stu-miR169f-3p	PGSC0003DMG400041789
stu-miR169f-3p	PGSC0003DMG400041834
stu-miR169f-3p	PGSC0003DMG400041878
stu-miR169f-3p	PGSC0003DMG400041968
stu-miR169f-3p	PGSC0003DMG400042255
stu-miR169f-3p	PGSC0003DMG400043152
stu-miR169f-3p	PGSC0003DMG400043215
stu-miR169f-3p	PGSC0003DMG400043635
stu-miR169f-3p	PGSC0003DMG400043790
stu-miR169f-3p	PGSC0003DMG400044276
stu-miR169f-3p	PGSC0003DMG400044748
stu-miR169f-3p	PGSC0003DMG400044852
stu-miR169f-3p	PGSC0003DMG400045098
stu-miR169f-3p	PGSC0003DMG400046275
stu-miR169f-3p	PGSC0003DMG400046677
stu-miR169f-3p	PGSC0003DMG400047156
stu-miR169f-3p	PGSC0003DMG400047221
stu-miR169f-3p	PGSC0003DMG401029598
stu-miR169f-3p	PGSC0003DMG402015781
stu-miR169f-3p	PGSC0003DMG402028565
stu-miR169f-3p	PGSC0003DMG402029598
stu-miR171a-3p	EPlSTUG00000000256
stu-miR171a-3p	EPlSTUG00000000396
stu-miR171a-3p	EPlSTUG00000000727
stu-miR171a-3p	EPlSTUG00000000917
stu-miR171a-3p	EPlSTUG00000001161
stu-miR171a-3p	EPlSTUG00000001435
stu-miR171a-3p	EPlSTUG00000002622
stu-miR171a-3p	EPlSTUG00000002642
stu-miR171a-3p	EPlSTUG00000002649
stu-miR171a-3p	EPlSTUG00000002851
stu-miR171a-3p	EPlSTUG00000003018
stu-miR171a-3p	EPlSTUG00000003150
stu-miR171a-3p	EPlSTUG00000003507
stu-miR171a-3p	EPlSTUG00000003755
stu-miR171a-3p	PGSC0003DMG400004752
stu-miR171a-3p	PGSC0003DMG400012167
stu-miR171a-3p	PGSC0003DMG400012683
stu-miR171a-3p	PGSC0003DMG400025973
stu-miR171a-3p	PGSC0003DMG400026973
stu-miR171a-5p	EPlSTUG00000001435
stu-miR171a-5p	PGSC0003DMG400028388
stu-miR171b-3p	EPlSTUG00000000256
stu-miR171b-3p	EPlSTUG00000000431
stu-miR171b-3p	EPlSTUG00000000444
stu-miR171b-3p	EPlSTUG00000000727
stu-miR171b-3p	EPlSTUG00000000917
stu-miR171b-3p	EPlSTUG00000001161
stu-miR171b-3p	EPlSTUG00000001435
stu-miR171b-3p	EPlSTUG00000002622
stu-miR171b-3p	EPlSTUG00000002649
stu-miR171b-3p	EPlSTUG00000002851
stu-miR171b-3p	EPlSTUG00000003018
stu-miR171b-3p	EPlSTUG00000003150
stu-miR171b-3p	EPlSTUG00000003507
stu-miR171b-3p	EPlSTUG00000003755
stu-miR171b-3p	PGSC0003DMG400004752
stu-miR171b-3p	PGSC0003DMG400006606
stu-miR171b-3p	PGSC0003DMG400006607
stu-miR171b-3p	PGSC0003DMG400007509
stu-miR171b-3p	PGSC0003DMG400007511
stu-miR171b-3p	PGSC0003DMG400012071
stu-miR171b-3p	PGSC0003DMG400025134
stu-miR171b-3p	PGSC0003DMG400025973
stu-miR171b-3p	PGSC0003DMG400039026
stu-miR171b-5p	EPlSTUG00000000444
stu-miR171b-5p	EPlSTUG00000001087
stu-miR171b-5p	EPlSTUG00000001884
stu-miR171b-5p	EPlSTUG00000002622
stu-miR171b-5p	EPlSTUG00000002649
stu-miR171b-5p	EPlSTUG00000002845
stu-miR171b-5p	PGSC0003DMG400010402
stu-miR171b-5p	PGSC0003DMG400015776
stu-miR171b-5p	PGSC0003DMG400023345
stu-miR171b-5p	PGSC0003DMG400025861
stu-miR171b-5p	PGSC0003DMG400030881
stu-miR171b-5p	PGSC0003DMG401029142
stu-miR171c-3p	EPlSTUG00000000256
stu-miR171c-3p	EPlSTUG00000000396
stu-miR171c-3p	EPlSTUG00000000444
stu-miR171c-3p	EPlSTUG00000000727
stu-miR171c-3p	EPlSTUG00000000917
stu-miR171c-3p	EPlSTUG00000001161
stu-miR171c-3p	EPlSTUG00000001435
stu-miR171c-3p	EPlSTUG00000002649
stu-miR171c-3p	EPlSTUG00000002851
stu-miR171c-3p	EPlSTUG00000003018
stu-miR171c-3p	EPlSTUG00000003150
stu-miR171c-3p	EPlSTUG00000003507
stu-miR171c-3p	EPlSTUG00000003755
stu-miR171c-3p	PGSC0003DMG400001414
stu-miR171c-3p	PGSC0003DMG400004752
stu-miR171c-3p	PGSC0003DMG400010441
stu-miR171c-3p	PGSC0003DMG400012683
stu-miR171c-3p	PGSC0003DMG400018099
stu-miR171c-3p	PGSC0003DMG400020157
stu-miR171c-3p	PGSC0003DMG400025973
stu-miR171c-3p	PGSC0003DMG400026973
stu-miR171d-3p	EPlSTUG00000000256
stu-miR171d-3p	EPlSTUG00000000431
stu-miR171d-3p	EPlSTUG00000000727
stu-miR171d-3p	EPlSTUG00000000917
stu-miR171d-3p	EPlSTUG00000001161
stu-miR171d-3p	EPlSTUG00000001435
stu-miR171d-3p	EPlSTUG00000002170
stu-miR171d-3p	EPlSTUG00000002569
stu-miR171d-3p	EPlSTUG00000002622
stu-miR171d-3p	EPlSTUG00000002642
stu-miR171d-3p	EPlSTUG00000002649
stu-miR171d-3p	EPlSTUG00000002851
stu-miR171d-3p	EPlSTUG00000003018
stu-miR171d-3p	EPlSTUG00000003150
stu-miR171d-3p	EPlSTUG00000003507
stu-miR171d-3p	EPlSTUG00000003755
stu-miR171d-3p	PGSC0003DMG400004752
stu-miR171d-3p	PGSC0003DMG400012071
stu-miR171d-3p	PGSC0003DMG400012683
stu-miR171d-3p	PGSC0003DMG400019756
stu-miR171d-3p	PGSC0003DMG400024458
stu-miR171d-3p	PGSC0003DMG400025134
stu-miR171d-3p	PGSC0003DMG400025973
stu-miR171d-3p	PGSC0003DMG400043771
stu-miR171d-5p	EPlSTUG00000000256
stu-miR171d-5p	EPlSTUG00000000396
stu-miR171d-5p	EPlSTUG00000000431
stu-miR171d-5p	EPlSTUG00000000444
stu-miR171d-5p	EPlSTUG00000000727
stu-miR171d-5p	EPlSTUG00000001087
stu-miR171d-5p	EPlSTUG00000001161
stu-miR171d-5p	EPlSTUG00000001884
stu-miR171d-5p	EPlSTUG00000002622
stu-miR171d-5p	EPlSTUG00000002642
stu-miR171d-5p	EPlSTUG00000002649
stu-miR171d-5p	EPlSTUG00000002845
stu-miR171d-5p	EPlSTUG00000002851
stu-miR171d-5p	EPlSTUG00000002924
stu-miR171d-5p	EPlSTUG00000003150
stu-miR171d-5p	PGSC0003DMG400030407
stu-miR171d-5p	PGSC0003DMG400032510
stu-miR171d-5p	PGSC0003DMG400038758
stu-miR171d-5p	PGSC0003DMG400045226
stu-miR172b-3p	EPlSTUG00000000395
stu-miR172b-3p	EPlSTUG00000000518
stu-miR172b-3p	EPlSTUG00000000566
stu-miR172b-3p	EPlSTUG00000001223
stu-miR172b-3p	EPlSTUG00000001696
stu-miR172b-3p	EPlSTUG00000002489
stu-miR172b-3p	EPlSTUG00000002582
stu-miR172b-3p	EPlSTUG00000002603
stu-miR172b-3p	EPlSTUG00000003194
stu-miR172b-3p	EPlSTUG00000003229
stu-miR172b-3p	EPlSTUG00000003250
stu-miR172b-3p	EPlSTUG00000003261
stu-miR172b-3p	EPlSTUG00000003363
stu-miR172b-3p	EPlSTUG00000003479
stu-miR172b-3p	EPlSTUG00000003559
stu-miR172b-3p	EPlSTUG00000003979
stu-miR172b-3p	PGSC0003DMG400000407
stu-miR172b-3p	PGSC0003DMG400001411
stu-miR172b-3p	PGSC0003DMG400001464
stu-miR172b-3p	PGSC0003DMG400001777
stu-miR172b-3p	PGSC0003DMG400004006
stu-miR172b-3p	PGSC0003DMG400006482
stu-miR172b-3p	PGSC0003DMG400006604
stu-miR172b-3p	PGSC0003DMG400006988
stu-miR172b-3p	PGSC0003DMG400008285
stu-miR172b-3p	PGSC0003DMG400008901
stu-miR172b-3p	PGSC0003DMG400011046
stu-miR172b-3p	PGSC0003DMG400011846
stu-miR172b-3p	PGSC0003DMG400012038
stu-miR172b-3p	PGSC0003DMG400013511
stu-miR172b-3p	PGSC0003DMG400017494
stu-miR172b-3p	PGSC0003DMG400019276
stu-miR172b-3p	PGSC0003DMG400019638
stu-miR172b-3p	PGSC0003DMG400020869
stu-miR172b-3p	PGSC0003DMG400024575
stu-miR172b-3p	PGSC0003DMG400024584
stu-miR172b-3p	PGSC0003DMG400025390
stu-miR172b-3p	PGSC0003DMG400025479
stu-miR172b-3p	PGSC0003DMG400027760
stu-miR172b-3p	PGSC0003DMG400027872
stu-miR172b-3p	PGSC0003DMG400027904
stu-miR172b-3p	PGSC0003DMG400027950
stu-miR172b-3p	PGSC0003DMG400030080
stu-miR172b-3p	PGSC0003DMG400040125
stu-miR172b-3p	PGSC0003DMG400044378
stu-miR172b-5p	EPlSTUG00000000395
stu-miR172b-5p	EPlSTUG00000000566
stu-miR172b-5p	EPlSTUG00000001223
stu-miR172b-5p	EPlSTUG00000001696
stu-miR172b-5p	EPlSTUG00000002489
stu-miR172b-5p	EPlSTUG00000002582
stu-miR172b-5p	EPlSTUG00000002603
stu-miR172b-5p	EPlSTUG00000003194
stu-miR172b-5p	EPlSTUG00000003229
stu-miR172b-5p	EPlSTUG00000003250
stu-miR172b-5p	EPlSTUG00000003261
stu-miR172b-5p	EPlSTUG00000003363
stu-miR172b-5p	EPlSTUG00000003479
stu-miR172b-5p	EPlSTUG00000003559
stu-miR172b-5p	EPlSTUG00000003979
stu-miR172b-5p	PGSC0003DMG400003294
stu-miR172b-5p	PGSC0003DMG400009536
stu-miR172b-5p	PGSC0003DMG400011044
stu-miR172b-5p	PGSC0003DMG400011457
stu-miR172b-5p	PGSC0003DMG400011575
stu-miR172b-5p	PGSC0003DMG400014279
stu-miR172b-5p	PGSC0003DMG400016904
stu-miR172b-5p	PGSC0003DMG400017347
stu-miR172b-5p	PGSC0003DMG400028115
stu-miR172b-5p	PGSC0003DMG400029593
stu-miR172b-5p	PGSC0003DMG400030347
stu-miR172b-5p	PGSC0003DMG400035480
stu-miR172b-5p	PGSC0003DMG400035667
stu-miR172b-5p	PGSC0003DMG400040355
stu-miR172b-5p	PGSC0003DMG400046727
stu-miR172b-5p	PGSC0003DMG402003179
stu-miR172c-3p	EPlSTUG00000000395
stu-miR172c-3p	EPlSTUG00000000518
stu-miR172c-3p	EPlSTUG00000000566
stu-miR172c-3p	EPlSTUG00000001223
stu-miR172c-3p	EPlSTUG00000001696
stu-miR172c-3p	EPlSTUG00000002489
stu-miR172c-3p	EPlSTUG00000002582
stu-miR172c-3p	EPlSTUG00000002603
stu-miR172c-3p	EPlSTUG00000003194
stu-miR172c-3p	EPlSTUG00000003229
stu-miR172c-3p	EPlSTUG00000003250
stu-miR172c-3p	EPlSTUG00000003261
stu-miR172c-3p	EPlSTUG00000003363
stu-miR172c-3p	EPlSTUG00000003479
stu-miR172c-3p	EPlSTUG00000003559
stu-miR172c-3p	EPlSTUG00000003979
stu-miR172c-3p	PGSC0003DMG400000125
stu-miR172c-3p	PGSC0003DMG400000407
stu-miR172c-3p	PGSC0003DMG400001018
stu-miR172c-3p	PGSC0003DMG400001411
stu-miR172c-3p	PGSC0003DMG400001464
stu-miR172c-3p	PGSC0003DMG400001777
stu-miR172c-3p	PGSC0003DMG400002671
stu-miR172c-3p	PGSC0003DMG400002717
stu-miR172c-3p	PGSC0003DMG400003502
stu-miR172c-3p	PGSC0003DMG400004006
stu-miR172c-3p	PGSC0003DMG400005324
stu-miR172c-3p	PGSC0003DMG400006248
stu-miR172c-3p	PGSC0003DMG400006432
stu-miR172c-3p	PGSC0003DMG400006482
stu-miR172c-3p	PGSC0003DMG400006556
stu-miR172c-3p	PGSC0003DMG400006604
stu-miR172c-3p	PGSC0003DMG400006857
stu-miR172c-3p	PGSC0003DMG400006988
stu-miR172c-3p	PGSC0003DMG400008285
stu-miR172c-3p	PGSC0003DMG400008901
stu-miR172c-3p	PGSC0003DMG400009434
stu-miR172c-3p	PGSC0003DMG400011046
stu-miR172c-3p	PGSC0003DMG400011059
stu-miR172c-3p	PGSC0003DMG400011846
stu-miR172c-3p	PGSC0003DMG400012038
stu-miR172c-3p	PGSC0003DMG400012131
stu-miR172c-3p	PGSC0003DMG400012557
stu-miR172c-3p	PGSC0003DMG400012760
stu-miR172c-3p	PGSC0003DMG400013511
stu-miR172c-3p	PGSC0003DMG400014472
stu-miR172c-3p	PGSC0003DMG400014512
stu-miR172c-3p	PGSC0003DMG400017234
stu-miR172c-3p	PGSC0003DMG400017494
stu-miR172c-3p	PGSC0003DMG400018365
stu-miR172c-3p	PGSC0003DMG400019276
stu-miR172c-3p	PGSC0003DMG400019638
stu-miR172c-3p	PGSC0003DMG400020082
stu-miR172c-3p	PGSC0003DMG400020869
stu-miR172c-3p	PGSC0003DMG400021168
stu-miR172c-3p	PGSC0003DMG400021331
stu-miR172c-3p	PGSC0003DMG400022830
stu-miR172c-3p	PGSC0003DMG400024322
stu-miR172c-3p	PGSC0003DMG400024575
stu-miR172c-3p	PGSC0003DMG400024584
stu-miR172c-3p	PGSC0003DMG400025390
stu-miR172c-3p	PGSC0003DMG400025479
stu-miR172c-3p	PGSC0003DMG400025794
stu-miR172c-3p	PGSC0003DMG400026258
stu-miR172c-3p	PGSC0003DMG400027760
stu-miR172c-3p	PGSC0003DMG400027872
stu-miR172c-3p	PGSC0003DMG400027904
stu-miR172c-3p	PGSC0003DMG400027950
stu-miR172c-3p	PGSC0003DMG400029872
stu-miR172c-3p	PGSC0003DMG400030080
stu-miR172c-3p	PGSC0003DMG400030788
stu-miR172c-3p	PGSC0003DMG400031798
stu-miR172c-3p	PGSC0003DMG400032834
stu-miR172c-3p	PGSC0003DMG400039267
stu-miR172c-3p	PGSC0003DMG400040125
stu-miR172c-3p	PGSC0003DMG400040726
stu-miR172c-3p	PGSC0003DMG400041563
stu-miR172c-3p	PGSC0003DMG400044378
stu-miR172c-3p	PGSC0003DMG400045264
stu-miR172c-3p	PGSC0003DMG400047300
stu-miR172c-3p	PGSC0003DMG401001720
stu-miR172c-3p	PGSC0003DMG401006315
stu-miR172c-3p	PGSC0003DMG401008570
stu-miR172c-3p	PGSC0003DMG401018705
stu-miR172c-3p	PGSC0003DMG401022702
stu-miR172c-3p	PGSC0003DMG401026315
stu-miR172c-3p	PGSC0003DMG402029961
stu-miR172c-3p	PGSC0003DMG403001309
stu-miR172c-3p	PGSC0003DMG404008678
stu-miR172d-3p	EPlSTUG00000000395
stu-miR172d-3p	EPlSTUG00000000518
stu-miR172d-3p	EPlSTUG00000000566
stu-miR172d-3p	EPlSTUG00000001223
stu-miR172d-3p	EPlSTUG00000001696
stu-miR172d-3p	EPlSTUG00000002489
stu-miR172d-3p	EPlSTUG00000002582
stu-miR172d-3p	EPlSTUG00000002603
stu-miR172d-3p	EPlSTUG00000003229
stu-miR172d-3p	EPlSTUG00000003250
stu-miR172d-3p	EPlSTUG00000003261
stu-miR172d-3p	EPlSTUG00000003363
stu-miR172d-3p	EPlSTUG00000003479
stu-miR172d-3p	EPlSTUG00000003559
stu-miR172d-3p	EPlSTUG00000003979
stu-miR172d-3p	PGSC0003DMG400001018
stu-miR172d-3p	PGSC0003DMG400001777
stu-miR172d-3p	PGSC0003DMG400002717
stu-miR172d-3p	PGSC0003DMG400004006
stu-miR172d-3p	PGSC0003DMG400006482
stu-miR172d-3p	PGSC0003DMG400006604
stu-miR172d-3p	PGSC0003DMG400006988
stu-miR172d-3p	PGSC0003DMG400008901
stu-miR172d-3p	PGSC0003DMG400011046
stu-miR172d-3p	PGSC0003DMG400012038
stu-miR172d-3p	PGSC0003DMG400017234
stu-miR172d-3p	PGSC0003DMG400024575
stu-miR172d-3p	PGSC0003DMG400025390
stu-miR172d-3p	PGSC0003DMG400025479
stu-miR172d-3p	PGSC0003DMG400027904
stu-miR172d-3p	PGSC0003DMG400027950
stu-miR172d-3p	PGSC0003DMG400030919
stu-miR172d-3p	PGSC0003DMG401006315
stu-miR172d-5p	EPlSTUG00000000395
stu-miR172d-5p	EPlSTUG00000000518
stu-miR172d-5p	EPlSTUG00000000566
stu-miR172d-5p	EPlSTUG00000001223
stu-miR172d-5p	EPlSTUG00000001696
stu-miR172d-5p	EPlSTUG00000002489
stu-miR172d-5p	EPlSTUG00000002582
stu-miR172d-5p	EPlSTUG00000002603
stu-miR172d-5p	EPlSTUG00000003194
stu-miR172d-5p	EPlSTUG00000003229
stu-miR172d-5p	EPlSTUG00000003250
stu-miR172d-5p	EPlSTUG00000003261
stu-miR172d-5p	EPlSTUG00000003363
stu-miR172d-5p	EPlSTUG00000003559
stu-miR172d-5p	EPlSTUG00000003979
stu-miR172d-5p	PGSC0003DMG400000761
stu-miR172d-5p	PGSC0003DMG400001688
stu-miR172d-5p	PGSC0003DMG400002071
stu-miR172d-5p	PGSC0003DMG400002884
stu-miR172d-5p	PGSC0003DMG400003774
stu-miR172d-5p	PGSC0003DMG400003902
stu-miR172d-5p	PGSC0003DMG400006119
stu-miR172d-5p	PGSC0003DMG400008847
stu-miR172d-5p	PGSC0003DMG400009430
stu-miR172d-5p	PGSC0003DMG400011046
stu-miR172d-5p	PGSC0003DMG400012887
stu-miR172d-5p	PGSC0003DMG400013458
stu-miR172d-5p	PGSC0003DMG400015771
stu-miR172d-5p	PGSC0003DMG400019030
stu-miR172d-5p	PGSC0003DMG400027140
stu-miR172d-5p	PGSC0003DMG400027147
stu-miR172d-5p	PGSC0003DMG400028110
stu-miR172d-5p	PGSC0003DMG400028555
stu-miR172d-5p	PGSC0003DMG400029157
stu-miR172d-5p	PGSC0003DMG400034509
stu-miR172d-5p	PGSC0003DMG400034665
stu-miR172d-5p	PGSC0003DMG400034864
stu-miR172d-5p	PGSC0003DMG400035039
stu-miR172d-5p	PGSC0003DMG400035096
stu-miR172d-5p	PGSC0003DMG400035128
stu-miR172d-5p	PGSC0003DMG400035145
stu-miR172d-5p	PGSC0003DMG400035480
stu-miR172d-5p	PGSC0003DMG400035853
stu-miR172d-5p	PGSC0003DMG400036141
stu-miR172d-5p	PGSC0003DMG400036965
stu-miR172d-5p	PGSC0003DMG400037569
stu-miR172d-5p	PGSC0003DMG400038187
stu-miR172d-5p	PGSC0003DMG400038243
stu-miR172d-5p	PGSC0003DMG400038404
stu-miR172d-5p	PGSC0003DMG400039560
stu-miR172d-5p	PGSC0003DMG400040404
stu-miR172d-5p	PGSC0003DMG400041770
stu-miR172d-5p	PGSC0003DMG400042392
stu-miR172d-5p	PGSC0003DMG400043024
stu-miR172d-5p	PGSC0003DMG400044017
stu-miR172d-5p	PGSC0003DMG400044138
stu-miR172d-5p	PGSC0003DMG400044389
stu-miR172d-5p	PGSC0003DMG400044924
stu-miR172d-5p	PGSC0003DMG400045214
stu-miR172d-5p	PGSC0003DMG400045738
stu-miR172d-5p	PGSC0003DMG400045801
stu-miR172d-5p	PGSC0003DMG400045817
stu-miR172d-5p	PGSC0003DMG400045828
stu-miR172d-5p	PGSC0003DMG400045869
stu-miR172d-5p	PGSC0003DMG400046181
stu-miR172d-5p	PGSC0003DMG400046382
stu-miR172d-5p	PGSC0003DMG400046537
stu-miR172d-5p	PGSC0003DMG402028522
stu-miR1886a	PGSC0003DMG400002105
stu-miR1886a	PGSC0003DMG400004345
stu-miR1886a	PGSC0003DMG400006892
stu-miR1886a	PGSC0003DMG400008869
stu-miR1886a	PGSC0003DMG400012210
stu-miR1886a	PGSC0003DMG400014722
stu-miR1886a	PGSC0003DMG400020212
stu-miR1886a	PGSC0003DMG400020781
stu-miR1886a	PGSC0003DMG400021498
stu-miR1886a	PGSC0003DMG400021527
stu-miR1886a	PGSC0003DMG400043600
stu-miR1886g-5p	PGSC0003DMG400007278
stu-miR1886g-5p	PGSC0003DMG400020145
stu-miR1886g-5p	PGSC0003DMG400020212
stu-miR1886g-5p	PGSC0003DMG401014716
stu-miR1886h	PGSC0003DMG400002105
stu-miR1886h	PGSC0003DMG400004345
stu-miR1886h	PGSC0003DMG400006807
stu-miR1886h	PGSC0003DMG400007650
stu-miR1886h	PGSC0003DMG400008869
stu-miR1886h	PGSC0003DMG400019189
stu-miR1886h	PGSC0003DMG400019716
stu-miR1886h	PGSC0003DMG400020212
stu-miR1886h	PGSC0003DMG400020546
stu-miR1886h	PGSC0003DMG400021498
stu-miR1886h	PGSC0003DMG400021527
stu-miR1886h	PGSC0003DMG401014805
stu-miR1886i-3p	PGSC0003DMG400002105
stu-miR1886i-3p	PGSC0003DMG400004345
stu-miR1886i-3p	PGSC0003DMG400007650
stu-miR1886i-3p	PGSC0003DMG400008869
stu-miR1886i-3p	PGSC0003DMG400015233
stu-miR1886i-3p	PGSC0003DMG400019189
stu-miR1886i-3p	PGSC0003DMG400019716
stu-miR1886i-3p	PGSC0003DMG400020212
stu-miR1886i-3p	PGSC0003DMG400021498
stu-miR1886i-3p	PGSC0003DMG400021527
stu-miR1886i-3p	PGSC0003DMG400023703
stu-miR1886i-3p	PGSC0003DMG400026732
stu-miR1886i-3p	PGSC0003DMG400029872
stu-miR1886i-3p	PGSC0003DMG400039678
stu-miR1886i-3p	PGSC0003DMG400045754
stu-miR1919-3p	PGSC0003DMG400000727
stu-miR1919-3p	PGSC0003DMG400029788
stu-miR1919-5p	PGSC0003DMG400002263
stu-miR1919-5p	PGSC0003DMG400002264
stu-miR1919-5p	PGSC0003DMG400010801
stu-miR1919-5p	PGSC0003DMG400042525
stu-miR319-3p	EPlSTUG00000001336
stu-miR319-3p	PGSC0003DMG400005269
stu-miR319-3p	PGSC0003DMG400012396
stu-miR319-3p	PGSC0003DMG400015377
stu-miR319-3p	PGSC0003DMG400015836
stu-miR319-3p	PGSC0003DMG400019904
stu-miR319-3p	PGSC0003DMG400025495
stu-miR319-3p	PGSC0003DMG400028386
stu-miR319-3p	PGSC0003DMG400033360
stu-miR319-3p	PGSC0003DMG400039789
stu-miR319-3p	PGSC0003DMG401029758
stu-miR319-3p	PGSC0003DMG402005658
stu-miR319a-3p	EPlSTUG00000000088
stu-miR319a-3p	EPlSTUG00000000327
stu-miR319a-3p	EPlSTUG00000000725
stu-miR319a-3p	EPlSTUG00000000995
stu-miR319a-3p	EPlSTUG00000001606
stu-miR319a-3p	EPlSTUG00000001612
stu-miR319a-3p	EPlSTUG00000002037
stu-miR319a-3p	EPlSTUG00000003004
stu-miR319a-3p	EPlSTUG00000003042
stu-miR319a-3p	EPlSTUG00000003312
stu-miR319a-3p	EPlSTUG00000003517
stu-miR319a-3p	PGSC0003DMG400022414
stu-miR319a-5p	EPlSTUG00000000088
stu-miR319a-5p	EPlSTUG00000000327
stu-miR319a-5p	EPlSTUG00000001612
stu-miR319a-5p	EPlSTUG00000003004
stu-miR319a-5p	EPlSTUG00000003042
stu-miR319a-5p	PGSC0003DMG400013515
stu-miR319a-5p	PGSC0003DMG400015231
stu-miR319a-5p	PGSC0003DMG400026429
stu-miR319a-5p	PGSC0003DMG400029849
stu-miR319a-5p	PGSC0003DMG400043385
stu-miR319a-5p	PGSC0003DMG401001116
stu-miR319a-5p	PGSC0003DMG402008294
stu-miR319b	EPlSTUG00000000088
stu-miR319b	EPlSTUG00000000327
stu-miR319b	EPlSTUG00000000588
stu-miR319b	EPlSTUG00000000725
stu-miR319b	EPlSTUG00000000735
stu-miR319b	EPlSTUG00000000958
stu-miR319b	EPlSTUG00000000995
stu-miR319b	EPlSTUG00000001100
stu-miR319b	EPlSTUG00000001518
stu-miR319b	EPlSTUG00000001606
stu-miR319b	EPlSTUG00000001612
stu-miR319b	EPlSTUG00000001933
stu-miR319b	EPlSTUG00000002037
stu-miR319b	EPlSTUG00000003004
stu-miR319b	EPlSTUG00000003033
stu-miR319b	EPlSTUG00000003042
stu-miR319b	EPlSTUG00000003312
stu-miR319b	EPlSTUG00000003517
stu-miR319b	PGSC0003DMG400005918
stu-miR319b	PGSC0003DMG400007072
stu-miR319b	PGSC0003DMG400015073
stu-miR319b	PGSC0003DMG400019904
stu-miR319b	PGSC0003DMG400022403
stu-miR319b	PGSC0003DMG400022414
stu-miR319b	PGSC0003DMG400022689
stu-miR319b	PGSC0003DMG400027418
stu-miR319b	PGSC0003DMG400028200
stu-miR319b	PGSC0003DMG400028783
stu-miR319b	PGSC0003DMG400035498
stu-miR319b	PGSC0003DMG402012324
stu-miR3627-3p	PGSC0003DMG400003246
stu-miR3627-3p	PGSC0003DMG400012815
stu-miR3627-3p	PGSC0003DMG400019895
stu-miR3627-3p	PGSC0003DMG400019935
stu-miR3627-5p	PGSC0003DMG401025397
stu-miR384-5p	EPlSTUG00000003864
stu-miR384-5p	EPlSTUG00000003879
stu-miR384-5p	PGSC0003DMG400016815
stu-miR384-5p	PGSC0003DMG400019494
stu-miR384-5p	PGSC0003DMG400020110
stu-miR384-5p	PGSC0003DMG400021245
stu-miR384-5p	PGSC0003DMG400026285
stu-miR384-5p	PGSC0003DMG400034305
stu-miR384-5p	PGSC0003DMG400039651
stu-miR384-5p	PGSC0003DMG402011656
stu-miR390-3p	EPlSTUG00000001437
stu-miR390-3p	EPlSTUG00000002585
stu-miR390-3p	EPlSTUG00000003099
stu-miR390-3p	EPlSTUG00000003923
stu-miR390-3p	PGSC0003DMG400000856
stu-miR390-3p	PGSC0003DMG400006974
stu-miR390-3p	PGSC0003DMG400009602
stu-miR390-3p	PGSC0003DMG400024959
stu-miR390-3p	PGSC0003DMG400026760
stu-miR390-3p	PGSC0003DMG400040634
stu-miR390-3p	PGSC0003DMG401001610
stu-miR390-5p	EPlSTUG00000002585
stu-miR390-5p	EPlSTUG00000003099
stu-miR390-5p	EPlSTUG00000003923
stu-miR390-5p	PGSC0003DMG400002618
stu-miR390-5p	PGSC0003DMG400004146
stu-miR390-5p	PGSC0003DMG400004584
stu-miR390-5p	PGSC0003DMG400008021
stu-miR390-5p	PGSC0003DMG400013085
stu-miR390-5p	PGSC0003DMG400015806
stu-miR390-5p	PGSC0003DMG400017800
stu-miR390-5p	PGSC0003DMG400017836
stu-miR390-5p	PGSC0003DMG400022139
stu-miR390-5p	PGSC0003DMG400023585
stu-miR390-5p	PGSC0003DMG400026004
stu-miR390-5p	PGSC0003DMG400030443
stu-miR390-5p	PGSC0003DMG400031103
stu-miR390-5p	PGSC0003DMG400034644
stu-miR390-5p	PGSC0003DMG400040039
stu-miR390-5p	PGSC0003DMG401017288
stu-miR390-5p	PGSC0003DMG401027271
stu-miR393-3p	PGSC0003DMG400005791
stu-miR393-5p	PGSC0003DMG400003405
stu-miR393-5p	PGSC0003DMG400005348
stu-miR393-5p	PGSC0003DMG400020729
stu-miR393-5p	PGSC0003DMG400021996
stu-miR393-5p	PGSC0003DMG400022404
stu-miR393-5p	PGSC0003DMG400024033
stu-miR393-5p	PGSC0003DMG400039315
stu-miR393-5p	PGSC0003DMG400042787
stu-miR395a	EPlSTUG00000000054
stu-miR395a	EPlSTUG00000000061
stu-miR395a	EPlSTUG00000000197
stu-miR395a	EPlSTUG00000000215
stu-miR395a	EPlSTUG00000000264
stu-miR395a	EPlSTUG00000000372
stu-miR395a	EPlSTUG00000000398
stu-miR395a	EPlSTUG00000000684
stu-miR395a	EPlSTUG00000000754
stu-miR395a	EPlSTUG00000000894
stu-miR395a	EPlSTUG00000000933
stu-miR395a	EPlSTUG00000001026
stu-miR395a	EPlSTUG00000001107
stu-miR395a	EPlSTUG00000001131
stu-miR395a	EPlSTUG00000001318
stu-miR395a	EPlSTUG00000001337
stu-miR395a	EPlSTUG00000001501
stu-miR395a	EPlSTUG00000001561
stu-miR395a	EPlSTUG00000001592
stu-miR395a	EPlSTUG00000001666
stu-miR395a	EPlSTUG00000001712
stu-miR395a	EPlSTUG00000001773
stu-miR395a	EPlSTUG00000001810
stu-miR395a	EPlSTUG00000001922
stu-miR395a	EPlSTUG00000002034
stu-miR395a	EPlSTUG00000002049
stu-miR395a	EPlSTUG00000002148
stu-miR395a	EPlSTUG00000002154
stu-miR395a	EPlSTUG00000002326
stu-miR395a	EPlSTUG00000002653
stu-miR395a	EPlSTUG00000002690
stu-miR395a	EPlSTUG00000002709
stu-miR395a	EPlSTUG00000002760
stu-miR395a	EPlSTUG00000002871
stu-miR395a	EPlSTUG00000002931
stu-miR395a	EPlSTUG00000003062
stu-miR395a	EPlSTUG00000003105
stu-miR395a	EPlSTUG00000003201
stu-miR395a	EPlSTUG00000003241
stu-miR395a	EPlSTUG00000003263
stu-miR395a	EPlSTUG00000003486
stu-miR395a	EPlSTUG00000003613
stu-miR395a	EPlSTUG00000003661
stu-miR395a	EPlSTUG00000003834
stu-miR395a	EPlSTUG00000003883
stu-miR395a	EPlSTUG00000003967
stu-miR395a	PGSC0003DMG400000403
stu-miR395a	PGSC0003DMG400013437
stu-miR395a	PGSC0003DMG400017008
stu-miR395a	PGSC0003DMG400018943
stu-miR395a	PGSC0003DMG400019091
stu-miR395a	PGSC0003DMG400023978
stu-miR395a	PGSC0003DMG400027912
stu-miR395a	PGSC0003DMG400029810
stu-miR395a	PGSC0003DMG400030403
stu-miR395a	PGSC0003DMG400033689
stu-miR395a	PGSC0003DMG400039127
stu-miR395a	PGSC0003DMG400047189
stu-miR395a	PGSC0003DMG401007428
stu-miR396-3p	EPlSTUG00000000132
stu-miR396-3p	EPlSTUG00000000507
stu-miR396-3p	EPlSTUG00000000928
stu-miR396-3p	EPlSTUG00000002506
stu-miR396-3p	EPlSTUG00000003286
stu-miR396-3p	EPlSTUG00000003529
stu-miR396-3p	PGSC0003DMG400005358
stu-miR396-3p	PGSC0003DMG400020788
stu-miR396-3p	PGSC0003DMG400029913
stu-miR396-3p	PGSC0003DMG400030417
stu-miR396-5p	EPlSTUG00000000132
stu-miR396-5p	EPlSTUG00000000928
stu-miR396-5p	EPlSTUG00000002028
stu-miR396-5p	EPlSTUG00000002506
stu-miR396-5p	EPlSTUG00000003286
stu-miR396-5p	EPlSTUG00000003529
stu-miR396-5p	PGSC0003DMG400001545
stu-miR396-5p	PGSC0003DMG400001735
stu-miR396-5p	PGSC0003DMG400002324
stu-miR396-5p	PGSC0003DMG400002354
stu-miR396-5p	PGSC0003DMG400002622
stu-miR396-5p	PGSC0003DMG400003062
stu-miR396-5p	PGSC0003DMG400005921
stu-miR396-5p	PGSC0003DMG400005950
stu-miR396-5p	PGSC0003DMG400006296
stu-miR396-5p	PGSC0003DMG400006816
stu-miR396-5p	PGSC0003DMG400007182
stu-miR396-5p	PGSC0003DMG400008410
stu-miR396-5p	PGSC0003DMG400008431
stu-miR396-5p	PGSC0003DMG400011316
stu-miR396-5p	PGSC0003DMG400011331
stu-miR396-5p	PGSC0003DMG400017495
stu-miR396-5p	PGSC0003DMG400018239
stu-miR396-5p	PGSC0003DMG400018637
stu-miR396-5p	PGSC0003DMG400019871
stu-miR396-5p	PGSC0003DMG400020558
stu-miR396-5p	PGSC0003DMG400021561
stu-miR396-5p	PGSC0003DMG400024053
stu-miR396-5p	PGSC0003DMG400024344
stu-miR396-5p	PGSC0003DMG400026899
stu-miR396-5p	PGSC0003DMG400030496
stu-miR396-5p	PGSC0003DMG400030498
stu-miR396-5p	PGSC0003DMG400036649
stu-miR396-5p	PGSC0003DMG400036716
stu-miR396-5p	PGSC0003DMG400037000
stu-miR396-5p	PGSC0003DMG400039789
stu-miR396-5p	PGSC0003DMG400043507
stu-miR396-5p	PGSC0003DMG400043976
stu-miR396-5p	PGSC0003DMG400046353
stu-miR396-5p	PGSC0003DMG400047046
stu-miR396-5p	PGSC0003DMG401019061
stu-miR396-5p	PGSC0003DMG401019388
stu-miR396-5p	PGSC0003DMG401023438
stu-miR396-5p	PGSC0003DMG402007600
stu-miR396-5p	PGSC0003DMG402026177
stu-miR396-5p	PGSC0003DMG402026984
stu-miR397-3p	EPlSTUG00000001785
stu-miR397-3p	EPlSTUG00000003117
stu-miR397-3p	PGSC0003DMG400001097
stu-miR397-3p	PGSC0003DMG400003036
stu-miR397-3p	PGSC0003DMG400005894
stu-miR397-3p	PGSC0003DMG400013473
stu-miR397-3p	PGSC0003DMG400013543
stu-miR397-3p	PGSC0003DMG400019624
stu-miR397-3p	PGSC0003DMG400027069
stu-miR397-3p	PGSC0003DMG400027155
stu-miR397-3p	PGSC0003DMG402024473
stu-miR397-3p	PGSC0003DMG402031202
stu-miR397-5p	EPlSTUG00000001785
stu-miR397-5p	EPlSTUG00000003117
stu-miR397-5p	PGSC0003DMG400000684
stu-miR397-5p	PGSC0003DMG400002948
stu-miR397-5p	PGSC0003DMG400003512
stu-miR397-5p	PGSC0003DMG400005258
stu-miR397-5p	PGSC0003DMG400007602
stu-miR397-5p	PGSC0003DMG400008778
stu-miR397-5p	PGSC0003DMG400008826
stu-miR397-5p	PGSC0003DMG400008898
stu-miR397-5p	PGSC0003DMG400009184
stu-miR397-5p	PGSC0003DMG400011019
stu-miR397-5p	PGSC0003DMG400011067
stu-miR397-5p	PGSC0003DMG400015484
stu-miR397-5p	PGSC0003DMG400019185
stu-miR397-5p	PGSC0003DMG400019268
stu-miR397-5p	PGSC0003DMG400020345
stu-miR397-5p	PGSC0003DMG400020355
stu-miR397-5p	PGSC0003DMG400022373
stu-miR397-5p	PGSC0003DMG400024511
stu-miR397-5p	PGSC0003DMG400028236
stu-miR397-5p	PGSC0003DMG400029545
stu-miR397-5p	PGSC0003DMG400030347
stu-miR397-5p	PGSC0003DMG400030376
stu-miR397-5p	PGSC0003DMG400030419
stu-miR397-5p	PGSC0003DMG400040837
stu-miR397-5p	PGSC0003DMG401008903
stu-miR397-5p	PGSC0003DMG402023951
stu-miR397-5p	PGSC0003DMG402028370
stu-miR398a-3p	EPlSTUG00000000230
stu-miR398a-3p	EPlSTUG00000001795
stu-miR398a-3p	PGSC0003DMG400001594
stu-miR398a-3p	PGSC0003DMG400004715
stu-miR398a-3p	PGSC0003DMG400015248
stu-miR398a-3p	PGSC0003DMG400036489
stu-miR398a-5p	PGSC0003DMG400001246
stu-miR398a-5p	PGSC0003DMG400003159
stu-miR398a-5p	PGSC0003DMG400006348
stu-miR398a-5p	PGSC0003DMG400007201
stu-miR398a-5p	PGSC0003DMG400009503
stu-miR398a-5p	PGSC0003DMG400010468
stu-miR398a-5p	PGSC0003DMG400011905
stu-miR398a-5p	PGSC0003DMG400013332
stu-miR398a-5p	PGSC0003DMG400017743
stu-miR398a-5p	PGSC0003DMG400017855
stu-miR398a-5p	PGSC0003DMG400019582
stu-miR398a-5p	PGSC0003DMG400023492
stu-miR398a-5p	PGSC0003DMG400028085
stu-miR398a-5p	PGSC0003DMG400029570
stu-miR398a-5p	PGSC0003DMG400029954
stu-miR398a-5p	PGSC0003DMG400030450
stu-miR398a-5p	PGSC0003DMG401012750
stu-miR398a-5p	PGSC0003DMG401023823
stu-miR398b-3p	EPlSTUG00000000230
stu-miR398b-3p	EPlSTUG00000001795
stu-miR398b-3p	PGSC0003DMG400001594
stu-miR398b-3p	PGSC0003DMG400002947
stu-miR398b-3p	PGSC0003DMG400004304
stu-miR398b-3p	PGSC0003DMG400004715
stu-miR399a-3p	EPlSTUG00000000703
stu-miR399a-3p	EPlSTUG00000001008
stu-miR399a-3p	EPlSTUG00000001776
stu-miR399a-3p	PGSC0003DMG400008384
stu-miR399a-3p	PGSC0003DMG400015191
stu-miR399a-3p	PGSC0003DMG400029724
stu-miR399a-5p	PGSC0003DMG400019789
stu-miR399a-5p	PGSC0003DMG400037486
stu-miR399g-3p	EPlSTUG00000000703
stu-miR399g-3p	PGSC0003DMG400000908
stu-miR399i-3p	EPlSTUG00000000166
stu-miR399i-3p	EPlSTUG00000000195
stu-miR399i-3p	EPlSTUG00000000703
stu-miR399i-3p	EPlSTUG00000000710
stu-miR399i-3p	EPlSTUG00000000863
stu-miR399i-3p	EPlSTUG00000000912
stu-miR399i-3p	EPlSTUG00000001008
stu-miR399i-3p	EPlSTUG00000001658
stu-miR399i-3p	EPlSTUG00000001776
stu-miR399i-3p	EPlSTUG00000001970
stu-miR399i-3p	EPlSTUG00000002041
stu-miR399i-3p	EPlSTUG00000003276
stu-miR399i-3p	EPlSTUG00000003441
stu-miR399i-3p	EPlSTUG00000003470
stu-miR399i-3p	EPlSTUG00000003708
stu-miR399i-3p	EPlSTUG00000003722
stu-miR399i-3p	PGSC0003DMG400017172
stu-miR399i-3p	PGSC0003DMG400018108
stu-miR399i-3p	PGSC0003DMG400024901
stu-miR399i-3p	PGSC0003DMG400025149
stu-miR399i-3p	PGSC0003DMG400029724
stu-miR399j-3p	EPlSTUG00000000703
stu-miR399j-3p	EPlSTUG00000001008
stu-miR399j-3p	EPlSTUG00000001776
stu-miR399j-3p	PGSC0003DMG400015191
stu-miR399j-5p	PGSC0003DMG400017862
stu-miR399j-5p	PGSC0003DMG400044641
stu-miR399j-5p	PGSC0003DMG401019151
stu-miR408a-3p	EPlSTUG00000002060
stu-miR408a-3p	EPlSTUG00000003535
stu-miR408a-3p	PGSC0003DMG400003683
stu-miR408a-3p	PGSC0003DMG400008778
stu-miR408a-3p	PGSC0003DMG400018286
stu-miR408a-3p	PGSC0003DMG400021640
stu-miR408a-3p	PGSC0003DMG400023751
stu-miR408a-3p	PGSC0003DMG400026413
stu-miR408a-3p	PGSC0003DMG400027168
stu-miR408a-3p	PGSC0003DMG400030557
stu-miR408a-3p	PGSC0003DMG400040373
stu-miR408a-3p	PGSC0003DMG400043875
stu-miR408a-3p	PGSC0003DMG401027116
stu-miR408a-3p	PGSC0003DMG402023951
stu-miR408a-3p	PGSC0003DMG402027116
stu-miR408a-3p	PGSC0003DMG402032165
stu-miR408a-5p	EPlSTUG00000002060
stu-miR408a-5p	EPlSTUG00000002607
stu-miR408a-5p	EPlSTUG00000003535
stu-miR408a-5p	PGSC0003DMG400018286
stu-miR408a-5p	PGSC0003DMG400018304
stu-miR408b-3p	EPlSTUG00000002060
stu-miR408b-3p	EPlSTUG00000002669
stu-miR408b-3p	EPlSTUG00000003535
stu-miR408b-3p	PGSC0003DMG400011145
stu-miR408b-3p	PGSC0003DMG400011961
stu-miR408b-3p	PGSC0003DMG400018286
stu-miR408b-3p	PGSC0003DMG400019788
stu-miR408b-3p	PGSC0003DMG400023751
stu-miR408b-3p	PGSC0003DMG400030839
stu-miR408b-3p	PGSC0003DMG400037877
stu-miR408b-3p	PGSC0003DMG401027116
stu-miR408b-3p	PGSC0003DMG402027116
stu-miR408b-5p	EPlSTUG00000002060
stu-miR408b-5p	EPlSTUG00000003535
stu-miR408b-5p	PGSC0003DMG400008150
stu-miR408b-5p	PGSC0003DMG400018286
stu-miR408b-5p	PGSC0003DMG400024073
stu-miR408b-5p	PGSC0003DMG400026904
stu-miR408b-5p	PGSC0003DMG400027565
stu-miR4376-3p	PGSC0003DMG400005276
stu-miR4376-3p	PGSC0003DMG400006107
stu-miR4376-3p	PGSC0003DMG400006497
stu-miR4376-3p	PGSC0003DMG400006993
stu-miR4376-3p	PGSC0003DMG400010715
stu-miR4376-3p	PGSC0003DMG400012028
stu-miR4376-3p	PGSC0003DMG400012586
stu-miR4376-3p	PGSC0003DMG400013344
stu-miR4376-3p	PGSC0003DMG400014587
stu-miR4376-3p	PGSC0003DMG400019236
stu-miR4376-3p	PGSC0003DMG400020777
stu-miR4376-3p	PGSC0003DMG400020795
stu-miR4376-3p	PGSC0003DMG400020801
stu-miR4376-3p	PGSC0003DMG400021658
stu-miR4376-3p	PGSC0003DMG400022541
stu-miR4376-3p	PGSC0003DMG400022955
stu-miR4376-3p	PGSC0003DMG400025500
stu-miR4376-3p	PGSC0003DMG400027268
stu-miR4376-3p	PGSC0003DMG400029059
stu-miR4376-3p	PGSC0003DMG400029654
stu-miR4376-3p	PGSC0003DMG400030894
stu-miR4376-3p	PGSC0003DMG400036049
stu-miR4376-3p	PGSC0003DMG400037126
stu-miR4376-3p	PGSC0003DMG401000410
stu-miR4376-3p	PGSC0003DMG401002229
stu-miR4376-3p	PGSC0003DMG401007403
stu-miR4376-3p	PGSC0003DMG401012699
stu-miR4376-3p	PGSC0003DMG401025083
stu-miR4376-3p	PGSC0003DMG401028577
stu-miR4376-3p	PGSC0003DMG401029823
stu-miR4376-5p	PGSC0003DMG400019438
stu-miR4376-5p	PGSC0003DMG400020777
stu-miR4376-5p	PGSC0003DMG400024159
stu-miR4376-5p	PGSC0003DMG400024209
stu-miR4376-5p	PGSC0003DMG400029335
stu-miR4376-5p	PGSC0003DMG400029425
stu-miR477a-3p	PGSC0003DMG400006350
stu-miR477a-3p	PGSC0003DMG400011044
stu-miR477a-3p	PGSC0003DMG400011432
stu-miR477a-3p	PGSC0003DMG400020717
stu-miR477a-3p	PGSC0003DMG400030059
stu-miR477a-3p	PGSC0003DMG402024469
stu-miR477a-5p	EPlSTUG00000001274
stu-miR477a-5p	EPlSTUG00000003660
stu-miR477a-5p	PGSC0003DMG400001792
stu-miR477a-5p	PGSC0003DMG400015255
stu-miR477a-5p	PGSC0003DMG400020262
stu-miR477a-5p	PGSC0003DMG400030790
stu-miR477b-3p	EPlSTUG00000005041
stu-miR477b-3p	PGSC0003DMG400011203
stu-miR477b-3p	PGSC0003DMG400017687
stu-miR477b-3p	PGSC0003DMG400019518
stu-miR477b-3p	PGSC0003DMG400022568
stu-miR477b-3p	PGSC0003DMG400023159
stu-miR477b-3p	PGSC0003DMG402007298
stu-miR477b-5p	EPlSTUG00000001274
stu-miR477b-5p	EPlSTUG00000003660
stu-miR477b-5p	PGSC0003DMG400001792
stu-miR477b-5p	PGSC0003DMG400003006
stu-miR477b-5p	PGSC0003DMG400015255
stu-miR477b-5p	PGSC0003DMG400016231
stu-miR477b-5p	PGSC0003DMG400020262
stu-miR477b-5p	PGSC0003DMG400029289
stu-miR477b-5p	PGSC0003DMG400046549
stu-miR479	EPlSTUG00000002170
stu-miR479	EPlSTUG00000002569
stu-miR479	EPlSTUG00000003018
stu-miR479	EPlSTUG00000003507
stu-miR479	PGSC0003DMG400008998
stu-miR479	PGSC0003DMG400010772
stu-miR479	PGSC0003DMG400012071
stu-miR479	PGSC0003DMG400017285
stu-miR479	PGSC0003DMG400019273
stu-miR479	PGSC0003DMG400020349
stu-miR479	PGSC0003DMG400044311
stu-miR479	PGSC0003DMG400046243
stu-miR482a-3p	PGSC0003DMG400002820
stu-miR482a-3p	PGSC0003DMG400002913
stu-miR482a-3p	PGSC0003DMG400004874
stu-miR482a-3p	PGSC0003DMG400005470
stu-miR482a-3p	PGSC0003DMG400006003
stu-miR482a-3p	PGSC0003DMG400006800
stu-miR482a-3p	PGSC0003DMG400007743
stu-miR482a-3p	PGSC0003DMG400010792
stu-miR482a-3p	PGSC0003DMG400011185
stu-miR482a-3p	PGSC0003DMG400015556
stu-miR482a-3p	PGSC0003DMG400015596
stu-miR482a-3p	PGSC0003DMG400016372
stu-miR482a-3p	PGSC0003DMG400016808
stu-miR482a-3p	PGSC0003DMG400016993
stu-miR482a-3p	PGSC0003DMG400017561
stu-miR482a-3p	PGSC0003DMG400018216
stu-miR482a-3p	PGSC0003DMG400020722
stu-miR482a-3p	PGSC0003DMG400020935
stu-miR482a-3p	PGSC0003DMG400022785
stu-miR482a-3p	PGSC0003DMG400023005
stu-miR482a-3p	PGSC0003DMG400023006
stu-miR482a-3p	PGSC0003DMG400026433
stu-miR482a-3p	PGSC0003DMG400031065
stu-miR482a-3p	PGSC0003DMG400044837
stu-miR482a-3p	PGSC0003DMG401020581
stu-miR482a-3p	PGSC0003DMG401020721
stu-miR482a-3p	PGSC0003DMG401026018
stu-miR482a-3p	PGSC0003DMG401026432
stu-miR482a-3p	PGSC0003DMG402009818
stu-miR482a-3p	PGSC0003DMG402020581
stu-miR482a-3p	PGSC0003DMG402020721
stu-miR482a-5p	PGSC0003DMG400000295
stu-miR482a-5p	PGSC0003DMG400000909
stu-miR482a-5p	PGSC0003DMG400004796
stu-miR482a-5p	PGSC0003DMG400010065
stu-miR482a-5p	PGSC0003DMG400010840
stu-miR482a-5p	PGSC0003DMG400014275
stu-miR482a-5p	PGSC0003DMG400017175
stu-miR482a-5p	PGSC0003DMG400017177
stu-miR482a-5p	PGSC0003DMG400019553
stu-miR482a-5p	PGSC0003DMG400024019
stu-miR482a-5p	PGSC0003DMG400025134
stu-miR482a-5p	PGSC0003DMG400025284
stu-miR482a-5p	PGSC0003DMG400038586
stu-miR482a-5p	PGSC0003DMG400043350
stu-miR482a-5p	PGSC0003DMG400045800
stu-miR482a-5p	PGSC0003DMG401005796
stu-miR482a-5p	PGSC0003DMG401011681
stu-miR482a-5p	PGSC0003DMG401031045
stu-miR482b-3p	PGSC0003DMG400000888
stu-miR482b-3p	PGSC0003DMG400001992
stu-miR482b-3p	PGSC0003DMG400001996
stu-miR482b-3p	PGSC0003DMG400004874
stu-miR482b-3p	PGSC0003DMG400009635
stu-miR482b-3p	PGSC0003DMG400013543
stu-miR482b-3p	PGSC0003DMG400013889
stu-miR482b-3p	PGSC0003DMG400014047
stu-miR482b-3p	PGSC0003DMG400015693
stu-miR482b-3p	PGSC0003DMG400019627
stu-miR482b-3p	PGSC0003DMG400022699
stu-miR482b-3p	PGSC0003DMG400026545
stu-miR482b-3p	PGSC0003DMG400026573
stu-miR482b-3p	PGSC0003DMG400030267
stu-miR482b-3p	PGSC0003DMG400030780
stu-miR482b-3p	PGSC0003DMG400033670
stu-miR482b-3p	PGSC0003DMG400043400
stu-miR482b-3p	PGSC0003DMG401015682
stu-miR482b-3p	PGSC0003DMG401027371
stu-miR482b-3p	PGSC0003DMG402002428
stu-miR482b-3p	PGSC0003DMG402027371
stu-miR482b-3p	PGSC0003DMG403016979
stu-miR482b-5p	PGSC0003DMG400010282
stu-miR482b-5p	PGSC0003DMG400017665
stu-miR482b-5p	PGSC0003DMG400030780
stu-miR482b-5p	PGSC0003DMG401031123
stu-miR482c	PGSC0003DMG400001983
stu-miR482c	PGSC0003DMG400002799
stu-miR482c	PGSC0003DMG400004874
stu-miR482c	PGSC0003DMG400007608
stu-miR482c	PGSC0003DMG400008588
stu-miR482c	PGSC0003DMG400008697
stu-miR482c	PGSC0003DMG400009324
stu-miR482c	PGSC0003DMG400011398
stu-miR482c	PGSC0003DMG400012650
stu-miR482c	PGSC0003DMG400013094
stu-miR482c	PGSC0003DMG400014943
stu-miR482c	PGSC0003DMG400017060
stu-miR482c	PGSC0003DMG400018050
stu-miR482c	PGSC0003DMG400019799
stu-miR482c	PGSC0003DMG400019803
stu-miR482c	PGSC0003DMG400019804
stu-miR482c	PGSC0003DMG400020935
stu-miR482c	PGSC0003DMG400021936
stu-miR482c	PGSC0003DMG400029590
stu-miR482c	PGSC0003DMG400030855
stu-miR482c	PGSC0003DMG400030856
stu-miR482c	PGSC0003DMG400038020
stu-miR482c	PGSC0003DMG401009305
stu-miR482c	PGSC0003DMG401021043
stu-miR482c	PGSC0003DMG401022350
stu-miR482c	PGSC0003DMG401030883
stu-miR482c	PGSC0003DMG402009305
stu-miR482c	PGSC0003DMG402026432
stu-miR482c	PGSC0003DMG402029312
stu-miR482c	PGSC0003DMG402030883
stu-miR482d-3p	PGSC0003DMG400001981
stu-miR482d-3p	PGSC0003DMG400001983
stu-miR482d-3p	PGSC0003DMG400001994
stu-miR482d-3p	PGSC0003DMG400002980
stu-miR482d-3p	PGSC0003DMG400006019
stu-miR482d-3p	PGSC0003DMG400006531
stu-miR482d-3p	PGSC0003DMG400007344
stu-miR482d-3p	PGSC0003DMG400007605
stu-miR482d-3p	PGSC0003DMG400009455
stu-miR482d-3p	PGSC0003DMG400010946
stu-miR482d-3p	PGSC0003DMG400011520
stu-miR482d-3p	PGSC0003DMG400011521
stu-miR482d-3p	PGSC0003DMG400011523
stu-miR482d-3p	PGSC0003DMG400011527
stu-miR482d-3p	PGSC0003DMG400011528
stu-miR482d-3p	PGSC0003DMG400011529
stu-miR482d-3p	PGSC0003DMG400011920
stu-miR482d-3p	PGSC0003DMG400011924
stu-miR482d-3p	PGSC0003DMG400013736
stu-miR482d-3p	PGSC0003DMG400014838
stu-miR482d-3p	PGSC0003DMG400016823
stu-miR482d-3p	PGSC0003DMG400018046
stu-miR482d-3p	PGSC0003DMG400018570
stu-miR482d-3p	PGSC0003DMG400018572
stu-miR482d-3p	PGSC0003DMG400018903
stu-miR482d-3p	PGSC0003DMG400019669
stu-miR482d-3p	PGSC0003DMG400021477
stu-miR482d-3p	PGSC0003DMG400023273
stu-miR482d-3p	PGSC0003DMG400024231
stu-miR482d-3p	PGSC0003DMG400024234
stu-miR482d-3p	PGSC0003DMG400024429
stu-miR482d-3p	PGSC0003DMG400024430
stu-miR482d-3p	PGSC0003DMG400027407
stu-miR482d-3p	PGSC0003DMG400029178
stu-miR482d-3p	PGSC0003DMG400030044
stu-miR482d-3p	PGSC0003DMG400030496
stu-miR482d-3p	PGSC0003DMG400030497
stu-miR482d-3p	PGSC0003DMG400030498
stu-miR482d-3p	PGSC0003DMG400030780
stu-miR482d-3p	PGSC0003DMG400032572
stu-miR482d-3p	PGSC0003DMG400032573
stu-miR482d-3p	PGSC0003DMG400032576
stu-miR482d-3p	PGSC0003DMG400032584
stu-miR482d-3p	PGSC0003DMG401002242
stu-miR482d-3p	PGSC0003DMG401003025
stu-miR482d-3p	PGSC0003DMG401007575
stu-miR482d-3p	PGSC0003DMG401009818
stu-miR482d-3p	PGSC0003DMG401011522
stu-miR482d-3p	PGSC0003DMG401011526
stu-miR482d-3p	PGSC0003DMG401016933
stu-miR482d-3p	PGSC0003DMG401027371
stu-miR482d-3p	PGSC0003DMG402001979
stu-miR482d-3p	PGSC0003DMG402018576
stu-miR482d-3p	PGSC0003DMG402027371
stu-miR482d-3p	PGSC0003DMG402032547
stu-miR482d-5p	PGSC0003DMG400000555
stu-miR482d-5p	PGSC0003DMG400000582
stu-miR482d-5p	PGSC0003DMG400003105
stu-miR482d-5p	PGSC0003DMG400006877
stu-miR482d-5p	PGSC0003DMG400007158
stu-miR482d-5p	PGSC0003DMG400007424
stu-miR482d-5p	PGSC0003DMG400012232
stu-miR482d-5p	PGSC0003DMG400015452
stu-miR482d-5p	PGSC0003DMG400020397
stu-miR482d-5p	PGSC0003DMG400020817
stu-miR482d-5p	PGSC0003DMG400022854
stu-miR482d-5p	PGSC0003DMG400028851
stu-miR482d-5p	PGSC0003DMG400044024
stu-miR482d-5p	PGSC0003DMG400045690
stu-miR482d-5p	PGSC0003DMG400045713
stu-miR482d-5p	PGSC0003DMG401022142
stu-miR482e-3p	PGSC0003DMG400001081
stu-miR482e-3p	PGSC0003DMG400001981
stu-miR482e-3p	PGSC0003DMG400001983
stu-miR482e-3p	PGSC0003DMG400001992
stu-miR482e-3p	PGSC0003DMG400001994
stu-miR482e-3p	PGSC0003DMG400001996
stu-miR482e-3p	PGSC0003DMG400002980
stu-miR482e-3p	PGSC0003DMG400004277
stu-miR482e-3p	PGSC0003DMG400004295
stu-miR482e-3p	PGSC0003DMG400006531
stu-miR482e-3p	PGSC0003DMG400007605
stu-miR482e-3p	PGSC0003DMG400007870
stu-miR482e-3p	PGSC0003DMG400007872
stu-miR482e-3p	PGSC0003DMG400009455
stu-miR482e-3p	PGSC0003DMG400011527
stu-miR482e-3p	PGSC0003DMG400011528
stu-miR482e-3p	PGSC0003DMG400011568
stu-miR482e-3p	PGSC0003DMG400013090
stu-miR482e-3p	PGSC0003DMG400013091
stu-miR482e-3p	PGSC0003DMG400016823
stu-miR482e-3p	PGSC0003DMG400018046
stu-miR482e-3p	PGSC0003DMG400018903
stu-miR482e-3p	PGSC0003DMG400022785
stu-miR482e-3p	PGSC0003DMG400022980
stu-miR482e-3p	PGSC0003DMG400024055
stu-miR482e-3p	PGSC0003DMG400024202
stu-miR482e-3p	PGSC0003DMG400024273
stu-miR482e-3p	PGSC0003DMG400024429
stu-miR482e-3p	PGSC0003DMG400024430
stu-miR482e-3p	PGSC0003DMG400027377
stu-miR482e-3p	PGSC0003DMG400027407
stu-miR482e-3p	PGSC0003DMG400029415
stu-miR482e-3p	PGSC0003DMG400030496
stu-miR482e-3p	PGSC0003DMG400030497
stu-miR482e-3p	PGSC0003DMG400030498
stu-miR482e-3p	PGSC0003DMG400030780
stu-miR482e-3p	PGSC0003DMG400044837
stu-miR482e-3p	PGSC0003DMG400046190
stu-miR482e-3p	PGSC0003DMG401002242
stu-miR482e-3p	PGSC0003DMG401002917
stu-miR482e-3p	PGSC0003DMG401003025
stu-miR482e-3p	PGSC0003DMG401007575
stu-miR482e-3p	PGSC0003DMG401009818
stu-miR482e-3p	PGSC0003DMG401011522
stu-miR482e-3p	PGSC0003DMG401016933
stu-miR482e-3p	PGSC0003DMG402001979
stu-miR482e-3p	PGSC0003DMG402009818
stu-miR482e-3p	PGSC0003DMG403001548
stu-miR482e-5p	PGSC0003DMG400001948
stu-miR482e-5p	PGSC0003DMG400018491
stu-miR482e-5p	PGSC0003DMG400021242
stu-miR482e-5p	PGSC0003DMG400030780
stu-miR482e-5p	PGSC0003DMG400039389
stu-miR482e-5p	PGSC0003DMG400042058
stu-miR482e-5p	PGSC0003DMG400044281
stu-miR5303c	PGSC0003DMG400000089
stu-miR5303c	PGSC0003DMG400000273
stu-miR5303c	PGSC0003DMG400000307
stu-miR5303c	PGSC0003DMG400000333
stu-miR5303c	PGSC0003DMG400000347
stu-miR5303c	PGSC0003DMG400000377
stu-miR5303c	PGSC0003DMG400000396
stu-miR5303c	PGSC0003DMG400000462
stu-miR5303c	PGSC0003DMG400000466
stu-miR5303c	PGSC0003DMG400000537
stu-miR5303c	PGSC0003DMG400000598
stu-miR5303c	PGSC0003DMG400000652
stu-miR5303c	PGSC0003DMG400000653
stu-miR5303c	PGSC0003DMG400000673
stu-miR5303c	PGSC0003DMG400000769
stu-miR5303c	PGSC0003DMG400000803
stu-miR5303c	PGSC0003DMG400000856
stu-miR5303c	PGSC0003DMG400001041
stu-miR5303c	PGSC0003DMG400001066
stu-miR5303c	PGSC0003DMG400001079
stu-miR5303c	PGSC0003DMG400001097
stu-miR5303c	PGSC0003DMG400001104
stu-miR5303c	PGSC0003DMG400001108
stu-miR5303c	PGSC0003DMG400001397
stu-miR5303c	PGSC0003DMG400001464
stu-miR5303c	PGSC0003DMG400001498
stu-miR5303c	PGSC0003DMG400001554
stu-miR5303c	PGSC0003DMG400001557
stu-miR5303c	PGSC0003DMG400001606
stu-miR5303c	PGSC0003DMG400001768
stu-miR5303c	PGSC0003DMG400001789
stu-miR5303c	PGSC0003DMG400001840
stu-miR5303c	PGSC0003DMG400001886
stu-miR5303c	PGSC0003DMG400001919
stu-miR5303c	PGSC0003DMG400001999
stu-miR5303c	PGSC0003DMG400002086
stu-miR5303c	PGSC0003DMG400002204
stu-miR5303c	PGSC0003DMG400002482
stu-miR5303c	PGSC0003DMG400002639
stu-miR5303c	PGSC0003DMG400002689
stu-miR5303c	PGSC0003DMG400002700
stu-miR5303c	PGSC0003DMG400002852
stu-miR5303c	PGSC0003DMG400002931
stu-miR5303c	PGSC0003DMG400003007
stu-miR5303c	PGSC0003DMG400003013
stu-miR5303c	PGSC0003DMG400003300
stu-miR5303c	PGSC0003DMG400003324
stu-miR5303c	PGSC0003DMG400003507
stu-miR5303c	PGSC0003DMG400003541
stu-miR5303c	PGSC0003DMG400003564
stu-miR5303c	PGSC0003DMG400003588
stu-miR5303c	PGSC0003DMG400003897
stu-miR5303c	PGSC0003DMG400004351
stu-miR5303c	PGSC0003DMG400004509
stu-miR5303c	PGSC0003DMG400004557
stu-miR5303c	PGSC0003DMG400004604
stu-miR5303c	PGSC0003DMG400004609
stu-miR5303c	PGSC0003DMG400004613
stu-miR5303c	PGSC0003DMG400004634
stu-miR5303c	PGSC0003DMG400004647
stu-miR5303c	PGSC0003DMG400004652
stu-miR5303c	PGSC0003DMG400004674
stu-miR5303c	PGSC0003DMG400004710
stu-miR5303c	PGSC0003DMG400004820
stu-miR5303c	PGSC0003DMG400004985
stu-miR5303c	PGSC0003DMG400005136
stu-miR5303c	PGSC0003DMG400005149
stu-miR5303c	PGSC0003DMG400005367
stu-miR5303c	PGSC0003DMG400005997
stu-miR5303c	PGSC0003DMG400006019
stu-miR5303c	PGSC0003DMG400006172
stu-miR5303c	PGSC0003DMG400006446
stu-miR5303c	PGSC0003DMG400006558
stu-miR5303c	PGSC0003DMG400006638
stu-miR5303c	PGSC0003DMG400006668
stu-miR5303c	PGSC0003DMG400006807
stu-miR5303c	PGSC0003DMG400006825
stu-miR5303c	PGSC0003DMG400007514
stu-miR5303c	PGSC0003DMG400007679
stu-miR5303c	PGSC0003DMG400007683
stu-miR5303c	PGSC0003DMG400007908
stu-miR5303c	PGSC0003DMG400007914
stu-miR5303c	PGSC0003DMG400008014
stu-miR5303c	PGSC0003DMG400008081
stu-miR5303c	PGSC0003DMG400008086
stu-miR5303c	PGSC0003DMG400008373
stu-miR5303c	PGSC0003DMG400008407
stu-miR5303c	PGSC0003DMG400008415
stu-miR5303c	PGSC0003DMG400008519
stu-miR5303c	PGSC0003DMG400008548
stu-miR5303c	PGSC0003DMG400008703
stu-miR5303c	PGSC0003DMG400008814
stu-miR5303c	PGSC0003DMG400008966
stu-miR5303c	PGSC0003DMG400009046
stu-miR5303c	PGSC0003DMG400009362
stu-miR5303c	PGSC0003DMG400009397
stu-miR5303c	PGSC0003DMG400009588
stu-miR5303c	PGSC0003DMG400009698
stu-miR5303c	PGSC0003DMG400009729
stu-miR5303c	PGSC0003DMG400009880
stu-miR5303c	PGSC0003DMG400009941
stu-miR5303c	PGSC0003DMG400010646
stu-miR5303c	PGSC0003DMG400010901
stu-miR5303c	PGSC0003DMG400010947
stu-miR5303c	PGSC0003DMG400010987
stu-miR5303c	PGSC0003DMG400011070
stu-miR5303c	PGSC0003DMG400011132
stu-miR5303c	PGSC0003DMG400011140
stu-miR5303c	PGSC0003DMG400011179
stu-miR5303c	PGSC0003DMG400011212
stu-miR5303c	PGSC0003DMG400011383
stu-miR5303c	PGSC0003DMG400011448
stu-miR5303c	PGSC0003DMG400011476
stu-miR5303c	PGSC0003DMG400011703
stu-miR5303c	PGSC0003DMG400011713
stu-miR5303c	PGSC0003DMG400011788
stu-miR5303c	PGSC0003DMG400011814
stu-miR5303c	PGSC0003DMG400011874
stu-miR5303c	PGSC0003DMG400011910
stu-miR5303c	PGSC0003DMG400012134
stu-miR5303c	PGSC0003DMG400012204
stu-miR5303c	PGSC0003DMG400012307
stu-miR5303c	PGSC0003DMG400012412
stu-miR5303c	PGSC0003DMG400012562
stu-miR5303c	PGSC0003DMG400012696
stu-miR5303c	PGSC0003DMG400012711
stu-miR5303c	PGSC0003DMG400012760
stu-miR5303c	PGSC0003DMG400012806
stu-miR5303c	PGSC0003DMG400012816
stu-miR5303c	PGSC0003DMG400012822
stu-miR5303c	PGSC0003DMG400012890
stu-miR5303c	PGSC0003DMG400013186
stu-miR5303c	PGSC0003DMG400013235
stu-miR5303c	PGSC0003DMG400013408
stu-miR5303c	PGSC0003DMG400013493
stu-miR5303c	PGSC0003DMG400013578
stu-miR5303c	PGSC0003DMG400013579
stu-miR5303c	PGSC0003DMG400013587
stu-miR5303c	PGSC0003DMG400013655
stu-miR5303c	PGSC0003DMG400013700
stu-miR5303c	PGSC0003DMG400013903
stu-miR5303c	PGSC0003DMG400013974
stu-miR5303c	PGSC0003DMG400014250
stu-miR5303c	PGSC0003DMG400014340
stu-miR5303c	PGSC0003DMG400014393
stu-miR5303c	PGSC0003DMG400014413
stu-miR5303c	PGSC0003DMG400014443
stu-miR5303c	PGSC0003DMG400014467
stu-miR5303c	PGSC0003DMG400014497
stu-miR5303c	PGSC0003DMG400014503
stu-miR5303c	PGSC0003DMG400014595
stu-miR5303c	PGSC0003DMG400014708
stu-miR5303c	PGSC0003DMG400014722
stu-miR5303c	PGSC0003DMG400014838
stu-miR5303c	PGSC0003DMG400014877
stu-miR5303c	PGSC0003DMG400014954
stu-miR5303c	PGSC0003DMG400015233
stu-miR5303c	PGSC0003DMG400015298
stu-miR5303c	PGSC0003DMG400015327
stu-miR5303c	PGSC0003DMG400015373
stu-miR5303c	PGSC0003DMG400015450
stu-miR5303c	PGSC0003DMG400015561
stu-miR5303c	PGSC0003DMG400016016
stu-miR5303c	PGSC0003DMG400016177
stu-miR5303c	PGSC0003DMG400016189
stu-miR5303c	PGSC0003DMG400016198
stu-miR5303c	PGSC0003DMG400016248
stu-miR5303c	PGSC0003DMG400016363
stu-miR5303c	PGSC0003DMG400016389
stu-miR5303c	PGSC0003DMG400016416
stu-miR5303c	PGSC0003DMG400017022
stu-miR5303c	PGSC0003DMG400017069
stu-miR5303c	PGSC0003DMG400017165
stu-miR5303c	PGSC0003DMG400017524
stu-miR5303c	PGSC0003DMG400017572
stu-miR5303c	PGSC0003DMG400017620
stu-miR5303c	PGSC0003DMG400018169
stu-miR5303c	PGSC0003DMG400018467
stu-miR5303c	PGSC0003DMG400018523
stu-miR5303c	PGSC0003DMG400018622
stu-miR5303c	PGSC0003DMG400018679
stu-miR5303c	PGSC0003DMG400018754
stu-miR5303c	PGSC0003DMG400018831
stu-miR5303c	PGSC0003DMG400019310
stu-miR5303c	PGSC0003DMG400019704
stu-miR5303c	PGSC0003DMG400019744
stu-miR5303c	PGSC0003DMG400019819
stu-miR5303c	PGSC0003DMG400019841
stu-miR5303c	PGSC0003DMG400020515
stu-miR5303c	PGSC0003DMG400020655
stu-miR5303c	PGSC0003DMG400020781
stu-miR5303c	PGSC0003DMG400020803
stu-miR5303c	PGSC0003DMG400020996
stu-miR5303c	PGSC0003DMG400021245
stu-miR5303c	PGSC0003DMG400021249
stu-miR5303c	PGSC0003DMG400021308
stu-miR5303c	PGSC0003DMG400021331
stu-miR5303c	PGSC0003DMG400021343
stu-miR5303c	PGSC0003DMG400021362
stu-miR5303c	PGSC0003DMG400021378
stu-miR5303c	PGSC0003DMG400021546
stu-miR5303c	PGSC0003DMG400022178
stu-miR5303c	PGSC0003DMG400022268
stu-miR5303c	PGSC0003DMG400022300
stu-miR5303c	PGSC0003DMG400022379
stu-miR5303c	PGSC0003DMG400022417
stu-miR5303c	PGSC0003DMG400022660
stu-miR5303c	PGSC0003DMG400022716
stu-miR5303c	PGSC0003DMG400022756
stu-miR5303c	PGSC0003DMG400022766
stu-miR5303c	PGSC0003DMG400022829
stu-miR5303c	PGSC0003DMG400023001
stu-miR5303c	PGSC0003DMG400023353
stu-miR5303c	PGSC0003DMG400023403
stu-miR5303c	PGSC0003DMG400023458
stu-miR5303c	PGSC0003DMG400023471
stu-miR5303c	PGSC0003DMG400023475
stu-miR5303c	PGSC0003DMG400023497
stu-miR5303c	PGSC0003DMG400023589
stu-miR5303c	PGSC0003DMG400023708
stu-miR5303c	PGSC0003DMG400023817
stu-miR5303c	PGSC0003DMG400023820
stu-miR5303c	PGSC0003DMG400023852
stu-miR5303c	PGSC0003DMG400023935
stu-miR5303c	PGSC0003DMG400024073
stu-miR5303c	PGSC0003DMG400024167
stu-miR5303c	PGSC0003DMG400024874
stu-miR5303c	PGSC0003DMG400024979
stu-miR5303c	PGSC0003DMG400025007
stu-miR5303c	PGSC0003DMG400025021
stu-miR5303c	PGSC0003DMG400025399
stu-miR5303c	PGSC0003DMG400025433
stu-miR5303c	PGSC0003DMG400025436
stu-miR5303c	PGSC0003DMG400025465
stu-miR5303c	PGSC0003DMG400025495
stu-miR5303c	PGSC0003DMG400025543
stu-miR5303c	PGSC0003DMG400025626
stu-miR5303c	PGSC0003DMG400025692
stu-miR5303c	PGSC0003DMG400025725
stu-miR5303c	PGSC0003DMG400025975
stu-miR5303c	PGSC0003DMG400026014
stu-miR5303c	PGSC0003DMG400026019
stu-miR5303c	PGSC0003DMG400026112
stu-miR5303c	PGSC0003DMG400026236
stu-miR5303c	PGSC0003DMG400026303
stu-miR5303c	PGSC0003DMG400026359
stu-miR5303c	PGSC0003DMG400026428
stu-miR5303c	PGSC0003DMG400026456
stu-miR5303c	PGSC0003DMG400026523
stu-miR5303c	PGSC0003DMG400026526
stu-miR5303c	PGSC0003DMG400026750
stu-miR5303c	PGSC0003DMG400026867
stu-miR5303c	PGSC0003DMG400026989
stu-miR5303c	PGSC0003DMG400027099
stu-miR5303c	PGSC0003DMG400027544
stu-miR5303c	PGSC0003DMG400027682
stu-miR5303c	PGSC0003DMG400027697
stu-miR5303c	PGSC0003DMG400027848
stu-miR5303c	PGSC0003DMG400027904
stu-miR5303c	PGSC0003DMG400028031
stu-miR5303c	PGSC0003DMG400028061
stu-miR5303c	PGSC0003DMG400028123
stu-miR5303c	PGSC0003DMG400028154
stu-miR5303c	PGSC0003DMG400028169
stu-miR5303c	PGSC0003DMG400028214
stu-miR5303c	PGSC0003DMG400028233
stu-miR5303c	PGSC0003DMG400028267
stu-miR5303c	PGSC0003DMG400028305
stu-miR5303c	PGSC0003DMG400028599
stu-miR5303c	PGSC0003DMG400028961
stu-miR5303c	PGSC0003DMG400028982
stu-miR5303c	PGSC0003DMG400029005
stu-miR5303c	PGSC0003DMG400029030
stu-miR5303c	PGSC0003DMG400029158
stu-miR5303c	PGSC0003DMG400029178
stu-miR5303c	PGSC0003DMG400029329
stu-miR5303c	PGSC0003DMG400029537
stu-miR5303c	PGSC0003DMG400029553
stu-miR5303c	PGSC0003DMG400029652
stu-miR5303c	PGSC0003DMG400029793
stu-miR5303c	PGSC0003DMG400029820
stu-miR5303c	PGSC0003DMG400029827
stu-miR5303c	PGSC0003DMG400029856
stu-miR5303c	PGSC0003DMG400030001
stu-miR5303c	PGSC0003DMG400030092
stu-miR5303c	PGSC0003DMG400030301
stu-miR5303c	PGSC0003DMG400030492
stu-miR5303c	PGSC0003DMG400030526
stu-miR5303c	PGSC0003DMG400030566
stu-miR5303c	PGSC0003DMG400030710
stu-miR5303c	PGSC0003DMG400030735
stu-miR5303c	PGSC0003DMG400030737
stu-miR5303c	PGSC0003DMG400030851
stu-miR5303c	PGSC0003DMG400030911
stu-miR5303c	PGSC0003DMG400030961
stu-miR5303c	PGSC0003DMG400030997
stu-miR5303c	PGSC0003DMG400031111
stu-miR5303c	PGSC0003DMG400031130
stu-miR5303c	PGSC0003DMG400031257
stu-miR5303c	PGSC0003DMG400031371
stu-miR5303c	PGSC0003DMG400031876
stu-miR5303c	PGSC0003DMG400032120
stu-miR5303c	PGSC0003DMG400032138
stu-miR5303c	PGSC0003DMG400032146
stu-miR5303c	PGSC0003DMG400032263
stu-miR5303c	PGSC0003DMG400032483
stu-miR5303c	PGSC0003DMG400032498
stu-miR5303c	PGSC0003DMG400032816
stu-miR5303c	PGSC0003DMG400033335
stu-miR5303c	PGSC0003DMG400033631
stu-miR5303c	PGSC0003DMG400034444
stu-miR5303c	PGSC0003DMG401002397
stu-miR5303c	PGSC0003DMG401005074
stu-miR5303c	PGSC0003DMG401006653
stu-miR5303c	PGSC0003DMG401008489
stu-miR5303c	PGSC0003DMG401008915
stu-miR5303c	PGSC0003DMG401010824
stu-miR5303c	PGSC0003DMG401011400
stu-miR5303c	PGSC0003DMG401013267
stu-miR5303c	PGSC0003DMG401013561
stu-miR5303c	PGSC0003DMG401014048
stu-miR5303c	PGSC0003DMG401015240
stu-miR5303c	PGSC0003DMG401015451
stu-miR5303c	PGSC0003DMG401016333
stu-miR5303c	PGSC0003DMG401016933
stu-miR5303c	PGSC0003DMG401016989
stu-miR5303c	PGSC0003DMG401018347
stu-miR5303c	PGSC0003DMG401018785
stu-miR5303c	PGSC0003DMG401019343
stu-miR5303c	PGSC0003DMG401019589
stu-miR5303c	PGSC0003DMG401020076
stu-miR5303c	PGSC0003DMG401020104
stu-miR5303c	PGSC0003DMG401021988
stu-miR5303c	PGSC0003DMG401023527
stu-miR5303c	PGSC0003DMG401024306
stu-miR5303c	PGSC0003DMG401025863
stu-miR5303c	PGSC0003DMG401026219
stu-miR5303c	PGSC0003DMG401027064
stu-miR5303c	PGSC0003DMG401027811
stu-miR5303c	PGSC0003DMG401028807
stu-miR5303c	PGSC0003DMG401028933
stu-miR5303c	PGSC0003DMG401029307
stu-miR5303c	PGSC0003DMG402000361
stu-miR5303c	PGSC0003DMG402001013
stu-miR5303c	PGSC0003DMG402001926
stu-miR5303c	PGSC0003DMG402004066
stu-miR5303c	PGSC0003DMG402005938
stu-miR5303c	PGSC0003DMG402006579
stu-miR5303c	PGSC0003DMG402007356
stu-miR5303c	PGSC0003DMG402012883
stu-miR5303c	PGSC0003DMG402012957
stu-miR5303c	PGSC0003DMG402013112
stu-miR5303c	PGSC0003DMG402015205
stu-miR5303c	PGSC0003DMG402016396
stu-miR5303c	PGSC0003DMG402016933
stu-miR5303c	PGSC0003DMG402017925
stu-miR5303c	PGSC0003DMG402018962
stu-miR5303c	PGSC0003DMG402022694
stu-miR5303c	PGSC0003DMG402024348
stu-miR5303c	PGSC0003DMG402025863
stu-miR5303c	PGSC0003DMG402027166
stu-miR5303c	PGSC0003DMG402028796
stu-miR5303c	PGSC0003DMG402028807
stu-miR5303c	PGSC0003DMG402030499
stu-miR5303c	PGSC0003DMG403008663
stu-miR5303c	PGSC0003DMG403016183
stu-miR5303c	PGSC0003DMG403019442
stu-miR5303e	PGSC0003DMG400000138
stu-miR5303e	PGSC0003DMG400000213
stu-miR5303e	PGSC0003DMG400000349
stu-miR5303e	PGSC0003DMG400000360
stu-miR5303e	PGSC0003DMG400000449
stu-miR5303e	PGSC0003DMG400000462
stu-miR5303e	PGSC0003DMG400000598
stu-miR5303e	PGSC0003DMG400000978
stu-miR5303e	PGSC0003DMG400001057
stu-miR5303e	PGSC0003DMG400001097
stu-miR5303e	PGSC0003DMG400001108
stu-miR5303e	PGSC0003DMG400001397
stu-miR5303e	PGSC0003DMG400001460
stu-miR5303e	PGSC0003DMG400001501
stu-miR5303e	PGSC0003DMG400001557
stu-miR5303e	PGSC0003DMG400001789
stu-miR5303e	PGSC0003DMG400001838
stu-miR5303e	PGSC0003DMG400001840
stu-miR5303e	PGSC0003DMG400001876
stu-miR5303e	PGSC0003DMG400002046
stu-miR5303e	PGSC0003DMG400002392
stu-miR5303e	PGSC0003DMG400002689
stu-miR5303e	PGSC0003DMG400002694
stu-miR5303e	PGSC0003DMG400002700
stu-miR5303e	PGSC0003DMG400002759
stu-miR5303e	PGSC0003DMG400003324
stu-miR5303e	PGSC0003DMG400003492
stu-miR5303e	PGSC0003DMG400003541
stu-miR5303e	PGSC0003DMG400003564
stu-miR5303e	PGSC0003DMG400003681
stu-miR5303e	PGSC0003DMG400003709
stu-miR5303e	PGSC0003DMG400003774
[truncated: 6,989 more rows]
