# Supplementary material for: Genome-wide miRNA expression profiling in potato (Solanum tuberosum L.) reveals TOR-dependent post-transcriptional gene regulatory networks in diverse metabolic pathway
Source: PeerJ. 2021 Jan 14;9:e10704. doi: 10.7717/peerj.10704 (PMC7811781; doi:10.7717/peerj.10704)
Supplement: Supplemental Information 8 [file peerj-09-10704-s008.xls]

## Sheet: Sheet1
Table S7 The annotation of putative targets of DE miRNAs identified in this study
Gene ID	Function
PGSC0003DMG400000021	Glucose/ribitol dehydrogenase||Short-chain dehydrogenase/reductase SDR||NAD(P)-binding domain
PGSC0003DMG400000027	Myb domain||SANT/Myb domain||Homeodomain-like
PGSC0003DMG400000049	Ccr4-not transcription complex
PGSC0003DMG400000060	Protein of unknown function DUF604
PGSC0003DMG400000079	BAG domain||IQ motif, EF-hand binding site
PGSC0003DMG400000089	Aldose 1-/Glucose-6-phosphate 1-epimerase||Glycoside hydrolase-type carbohydrate-binding||Glycoside hydrolase-type carbohydrate-binding, subgroup||Glucose-6-phosphate 1-epimerase
PGSC0003DMG400000092	Mitochondrial carrier domain||Mitochondrial substrate/solute carrier||Mitochondrial carrier protein
PGSC0003DMG400000125	Protein of unknown function DUF4079
PGSC0003DMG400000138	PAP/25A-associated||Nucleotidyl transferase domain
PGSC0003DMG400000169	BZR1, transcriptional repressor||Glycoside hydrolase, catalytic domain||Glycoside hydrolase, superfamily||Glycoside hydrolase, family 14B, plant||Glycoside hydrolase, family 14
PGSC0003DMG400000206	Exoribonuclease, phosphorolytic domain 2||Exoribonuclease, phosphorolytic domain 1||Ribosomal protein S5 domain 2-type fold||PNPase/RNase PH domain
PGSC0003DMG400000213	Histone-fold||Histone H3||Histone core
PGSC0003DMG400000227	P-loop containing nucleoside triphosphate hydrolase||Dynamin, GTPase region, conserved site||GTPase effector domain, GED||Dynamin GTPase effector||Dynamin, GTPase domain||Dynamin||Dynamin central domain
PGSC0003DMG400000273	Serine/threonine-protein kinase, active site||Protein kinase, catalytic domain||Protein kinase-like domain||Serine/threonine- / dual-specificity protein kinase, catalytic domain||Protein kinase, ATP binding site||Serine-threonine/tyrosine-protein kinase catalytic domain
PGSC0003DMG400000279	Uncharacterised protein family UPF0197
PGSC0003DMG400000295	Hexokinase||Hexokinase, C-terminal||Hexokinase, N-terminal
PGSC0003DMG400000297	Senescence/spartin-associated
PGSC0003DMG400000298	Protein-tyrosine phosphatase-like||Initiator tRNA phosphoribosyl transferase
PGSC0003DMG400000304	Small GTP-binding protein domain||P-loop containing nucleoside triphosphate hydrolase||Small GTPase superfamily, Rho type||Small GTPase superfamily
PGSC0003DMG400000307	ABI family
PGSC0003DMG400000308	Domain of unknown function DUF4378
PGSC0003DMG400000322	NIG
PGSC0003DMG400000333	Lycopene cyclase, beta/epsilon||Lycopene cyclase-type, FAD-binding
PGSC0003DMG400000335	Oxygen oxidoreductase covalent FAD-binding site||Helix-loop-helix domain||FAD-binding, type 2, subdomain 1||Cytokinin dehydrogenase 1, FAD/cytokinin binding domain||CO dehydrogenase flavoprotein-like, FAD-binding, subdomain 2||FAD-binding, type 2||FAD linked oxidase, N-terminal||Vanillyl-alcohol oxidase/Cytokinin dehydrogenase C-terminal domain||FAD-linked oxidase-like, C-terminal
PGSC0003DMG400000340	Myb domain||SANT/Myb domain||Zinc finger, CCHC-type||Myb domain, plants||Homeodomain-like
PGSC0003DMG400000347	Amidohydrolase||Peptidase M20||Peptidase M20, dimerisation
PGSC0003DMG400000360	Malic enzyme, N-terminal||Malic enzyme, conserved site||Malic oxidoreductase||NAD(P)-binding domain||Malic enzyme, NAD-binding
PGSC0003DMG400000366	Exostosin-like
PGSC0003DMG400000375	Aux/IAA-ARF-dimerisation||AUX/IAA protein
PGSC0003DMG400000377	Plant specific Rop nucleotide exchanger, PRONE
PGSC0003DMG400000394	Brix domain||Anticodon-binding
PGSC0003DMG400000396	Zinc finger, RING/FYVE/PHD-type||Armadillo-type fold||U box domain||Armadillo||Armadillo-like helical
PGSC0003DMG400000407	Replication factor A, C-terminal||Nucleic acid-binding, OB-fold
PGSC0003DMG400000435	Protein of unknown function DUF3411
PGSC0003DMG400000449	Snf7
PGSC0003DMG400000457	Pheophorbide a oxygenase||Rieske [2Fe-2S] iron-sulphur domain
PGSC0003DMG400000459	Zinc finger, RING/FYVE/PHD-type||Zinc finger, PHD-finger||Acyl-CoA N-acyltransferase||Zinc finger, FYVE/PHD-type||Zinc finger, PHD-type, conserved site||Zinc finger, PHD-type
PGSC0003DMG400000462	Nucleotide-binding, alpha-beta plait||RNA recognition motif domain
PGSC0003DMG400000465	Lipase, GDSL, active site||Esterase, SGNH hydrolase-type, subgroup||Lipase, GDSL
PGSC0003DMG400000466	Lecithin:cholesterol/phospholipid:diacylglycerol acyltransferase||Alpha/Beta hydrolase fold
PGSC0003DMG400000486	Pyridine nucleotide-disulphide oxidoreductase, FAD/NAD(P)-binding domain||Pyridine nucleotide-disulphide oxidoreductase, NAD-binding domain||FAD-dependent pyridine nucleotide-disulphide oxidoreductase||FAD/NAD-linked reductase, dimerisation
PGSC0003DMG400000537	TGS-like||RelA/SpoT||TGS||Beta-grasp domain||HD/PDEase domain
PGSC0003DMG400000598	Conserved gene of unknown function
PGSC0003DMG400000608	Pectin lyase fold||Glycoside hydrolase, family 28||Parallel beta-helix repeat||Pectin lyase fold/virulence factor
PGSC0003DMG400000652	Protein kinase-like domain||Serine/threonine-protein kinase, active site||Protein kinase, catalytic domain
PGSC0003DMG400000653	Agmatine deiminase||Peptidyl-arginine deiminase, Porphyromonas-type
PGSC0003DMG400000657	Tetraspanin/Peripherin
PGSC0003DMG400000673	Zinc finger, RING/FYVE/PHD-type||Zinc finger, FYVE/PHD-type||Zinc finger, PHD-finger||Zinc finger, PHD-type, conserved site||Bromo adjacent homology (BAH) domain||Zinc finger, PHD-type
PGSC0003DMG400000677	Gene of unknown function
PGSC0003DMG400000754	Serine/threonine-protein kinase, active site||Protein kinase, catalytic domain||Serine/threonine- / dual-specificity protein kinase, catalytic domain||EF-hand-like domain||Protein kinase, ATP binding site||Protein kinase-like domain||Calcium-binding EF-hand
PGSC0003DMG400000761	Multicopper oxidase, type 3||Cupredoxin||Multicopper oxidase, type 1||Multicopper oxidase, type 2
PGSC0003DMG400000769	Gene of unknown function
PGSC0003DMG400000803	Cytochrome b561, eukaryote||Cytochrome b561/ferric reductase transmembrane
PGSC0003DMG400000810	Malectin-like carbohydrate-binding domain||Leucine-rich repeat
PGSC0003DMG400000813	NB-ARC||P-loop containing nucleoside triphosphate hydrolase
PGSC0003DMG400000818	Amino acid transporter, transmembrane
PGSC0003DMG400000856	Serine-threonine/tyrosine-protein kinase catalytic domain||Protein kinase, ATP binding site||Concanavalin A-like lectin/glucanase, subgroup||Protein kinase-like domain||Serine/threonine-protein kinase, active site||Protein kinase, catalytic domain
PGSC0003DMG400000864	Porin domain||Eukaryotic porin/Tom40||Porin, eukaryotic type
PGSC0003DMG400000869	Quinonprotein alcohol dehydrogenase-like domain||Pyrrolo-quinoline quinone beta-propeller repeat||Quinonprotein alcohol dehydrogenase-like
PGSC0003DMG400000891	Peptidase S8, subtilisin-related||Proteinase inhibitor I9
PGSC0003DMG400000908	Zinc finger, RING-type||Zinc finger, RING/FYVE/PHD-type
PGSC0003DMG400000912	TMP21-related||GOLD
PGSC0003DMG400000930	TRAM/LAG1/CLN8 homology domain
PGSC0003DMG400000957	tRNA isopentenyltransferase||P-loop containing nucleoside triphosphate hydrolase
PGSC0003DMG400000962	Gene of unknown function
PGSC0003DMG400000978	Fatty acid desaturase, type 2||Stearoyl-ACP desaturase, conserved site||Ribonucleotide reductase-related||Ferritin/ribonucleotide reductase-like
PGSC0003DMG400001009	Gene of unknown function
PGSC0003DMG400001016	Protein kinase, ATP binding site||Leucine rich repeats (2 copies)||Leucine-rich repeat-containing N-terminal, type 2||O-acyltransferase, WSD1, C-terminal||Concanavalin A-like lectin/glucanase, subgroup||Protein kinase-like domain||Protein kinase, catalytic domain||Serine/threonine-protein kinase, active site||Leucine-rich repeat
PGSC0003DMG400001018	Gene of unknown function
PGSC0003DMG400001041	Drug/metabolite transporter||Domain of unknown function DUF250||Tpt phosphate/phosphoenolpyruvate translocator
PGSC0003DMG400001047	Domain of unknown function DUF1692||Thioredoxin domain||Thioredoxin-like fold
PGSC0003DMG400001057	SOUL haem-binding protein||Regulatory factor, effector, bacterial||Protein of unknown function DUF2358
PGSC0003DMG400001058	FAE1/Type III polyketide synthase-like protein||Thiolase-like, subgroup||Very-long-chain 3-ketoacyl-CoA synthase||3-Oxoacyl-[acyl-carrier-protein (ACP)] synthase III C-terminal||Thiolase-like
PGSC0003DMG400001064	Conserved gene of unknown function
PGSC0003DMG400001066	RmlC-like jelly roll fold||Ankyrin repeat||Cyclic nucleotide-binding domain||Cyclic nucleotide-binding-like||Ion transport domain||Ankyrin repeat-containing domain||Potassium channel, voltage-dependent, EAG/ELK/ERG||Potassium channel, plant-type
PGSC0003DMG400001078	Cytochrome P450||Cytochrome P450, E-class, group IV
PGSC0003DMG400001079	Glycosyl transferase, family 19
PGSC0003DMG400001082	ATPase, V0 complex, subunit E
PGSC0003DMG400001083	DNA topoisomerase I, catalytic core, eukaryotic-type||DNA topoisomerase I, catalytic core, alpha-helical subdomain, eukaryotic-type||DNA topoisomerase I, catalytic core, alpha/beta subdomain, eukaryotic-type||DNA topoisomerase I, active site||Topoisomerase I C-terminal domain||DNA topoisomerase I, DNA binding, eukaryotic-type||DNA topoisomerase I||DNA topoisomerase I, DNA binding, mixed alpha/bet…
PGSC0003DMG400001090	AT hook, DNA-binding motif
PGSC0003DMG400001097	Pollen Ole e 1 allergen/extensin
PGSC0003DMG400001098	Cytochrome P450, conserved site||Cytochrome P450, E-class, group I||Cytochrome P450
PGSC0003DMG400001104	Helicase, C-terminal||DNA/RNA helicase, DEAD/DEAH box type, N-terminal||RNA helicase, DEAD-box type, Q motif||P-loop containing nucleoside triphosphate hydrolase||Helicase, superfamily 1/2, ATP-binding domain
PGSC0003DMG400001108	S-adenosyl-L-methionine-dependent methyltransferase-like
PGSC0003DMG400001118	Zinc finger, DHHC-type, palmitoyltransferase
PGSC0003DMG400001197	PMR5 N-terminal domain||PC-Esterase
PGSC0003DMG400001228	Cytochrome b5, heme-binding site||Cytochrome b5
PGSC0003DMG400001232	BTB/POZ fold||BTB/POZ||NPH3 domain||BTB/POZ-like
PGSC0003DMG400001246	Amidohydrolase 1||Urease, gamma/gamma-beta subunit||Urease, beta subunit||Metal-dependent hydrolase, composite domain||Urease, alpha subunit, C-terminal||Urease nickel binding site||Urease, alpha subunit||Urease alpha-subunit, N-terminal
PGSC0003DMG400001296	Transcription factor E2F/dimerisation partner (TDP)||E2F Family||Winged helix-turn-helix transcription repressor DNA-binding
PGSC0003DMG400001297	Gene of unknown function
PGSC0003DMG400001326	SMCs flexible hinge||RecF/RecN/SMC||Structural maintenance of chromosomes protein||P-loop containing nucleoside triphosphate hydrolase
PGSC0003DMG400001365	Winged helix-turn-helix transcription repressor DNA-binding||Eukaryotic translation initiation factor 3 subunit M||Proteasome component (PCI) domain
PGSC0003DMG400001397	Histone deacetylase interacting||Paired amphipathic helix
PGSC0003DMG400001411	S-adenosyl-L-methionine-dependent methyltransferase-like||Putative S-adenosyl-L-methionine-dependent methyltransferase MidA
PGSC0003DMG400001437	Cupredoxin||Plastocyanin-like
PGSC0003DMG400001460	Protein of unknown function DUF1675
PGSC0003DMG400001464	Mitochondrial carrier protein||Mitochondrial substrate/solute carrier||Mitochondrial carrier domain
PGSC0003DMG400001495	START-like domain||Nucleotide-binding, alpha-beta plait||RNA recognition motif domain||Bet v I type allergen||Bet v I domain
PGSC0003DMG400001498	Aux/IAA-ARF-dimerisation||AUX/IAA protein
PGSC0003DMG400001501	Sec20
PGSC0003DMG400001554	UspA||Rossmann-like alpha/beta/alpha sandwich fold
PGSC0003DMG400001556	Transcription factor GRAS||BolA protein
PGSC0003DMG400001557	Histone H3-K9 methyltransferase, plant||Pre-SET domain||PUA-like domain||SET domain||SRA-YDG
PGSC0003DMG400001570	Catalase, mono-functional, haem-containing||Catalase-like domain||Catalase haem-binding site||Catalase core domain||Catalase, mono-functional, haem-containing, clades 1 and 3||Catalase immune-responsive domain||Catalase active site
PGSC0003DMG400001573	Trimeric LpxA-like||Serine acetyltransferase, N-terminal||Serine O-acetyltransferase||Hexapeptide transferase, conserved site||Bacterial transferase hexapeptide repeat
PGSC0003DMG400001594	Helix-loop-helix domain
PGSC0003DMG400001606	RNA recognition motif domain||Nucleotide-binding, alpha-beta plait
PGSC0003DMG400001656	ATPase, F0 complex, subunit E, mitochondrial
PGSC0003DMG400001683	PIG-P
PGSC0003DMG400001688	Protein of unknown function DUF581
PGSC0003DMG400001703	Sister chromatid cohesion protein DCC1
PGSC0003DMG400001741	Conserved gene of unknown function
PGSC0003DMG400001768	IQ motif, EF-hand binding site||Domain of unknown function DUF4005
PGSC0003DMG400001777	Zinc finger, RING/FYVE/PHD-type||Zinc finger, RING-type
PGSC0003DMG400001780	HAUS augmin-like complex subunit 7-like||Plant nuclear matrix 1
PGSC0003DMG400001789	Complex 1 LYR protein
PGSC0003DMG400001805	Calcium-binding EF-hand||EF-hand-like domain
PGSC0003DMG400001826	Gene of unknown function
PGSC0003DMG400001838	Centromere protein Cenp-O
PGSC0003DMG400001840	Reticulon
PGSC0003DMG400001844	Pectinesterase inhibitor
PGSC0003DMG400001876	Conserved gene of unknown function
PGSC0003DMG400001886	Membrane bound O-acyl transferase, MBOAT
PGSC0003DMG400001909	Multi antimicrobial extrusion protein
PGSC0003DMG400001912	Alpha-D-phosphohexomutase, alpha/beta/alpha domain II||Alpha-D-phosphohexomutase, C-terminal||Alpha-D-phosphohexomutase, alpha/beta/alpha domain III||Alpha-D-phosphohexomutase, alpha/beta/alpha I/II/III||Alpha-D-phosphohexomutase, alpha/beta/alpha domain I||Alpha-D-phosphohexomutase superfamily
PGSC0003DMG400001914	Terpene synthase, metal-binding domain||Terpene synthase-like||Terpenoid cyclases/protein prenyltransferase alpha-alpha toroid||Terpenoid synthase
PGSC0003DMG400001919	Helix-loop-helix domain
PGSC0003DMG400001921	Ribonuclease H domain||Ribonuclease H1, N-terminal||Ribonuclease H-like domain||Ribosomal protein L9/RNase H1, N-terminal
PGSC0003DMG400001932	NAD(P)-binding domain||Dehydrogenase, multihelical||6-phosphogluconate dehydrogenase, NADP-binding||6-phosphogluconate dehydrogenase, C-terminal-like||6-phosphogluconate dehydrogenase, decarboxylating||Fibritin/6-phosphogluconate dehydrogenase, C-terminal extension||6-phosphogluconate dehydrogenase, C-terminal
PGSC0003DMG400001936	Conserved gene of unknown function
PGSC0003DMG400001963	F-box domain, cyclin-like
PGSC0003DMG400001999	Basic-leucine zipper domain
PGSC0003DMG400002009	Alpha crystallin/Hsp20 domain||HSP20-like chaperone
PGSC0003DMG400002012	Protein kinase-like domain||Protein kinase, catalytic domain||Leucine-rich repeat-containing N-terminal, type 2||Serine-threonine/tyrosine-protein kinase catalytic domain||Leucine-rich repeat
PGSC0003DMG400002017	S-locus glycoprotein||Protein kinase-like domain||Concanavalin A-like lectin/glucanase, subgroup||Bulb-type lectin domain||Serine/threonine-protein kinase, active site||Protein kinase, catalytic domain
PGSC0003DMG400002021	Domain of unknown function DUF632||Domain of unknown function DUF630
PGSC0003DMG400002037	Pyridoxal phosphate-dependent transferase, major region, subdomain 1||Pyridoxal phosphate-dependent transferase, major domain||Tyrosine/nicotianamine aminotransferase||Pyridoxal phosphate-dependent transferase, major region, subdomain 2||Aminotransferase, class I/classII||Tyrosine transaminase||Aminotransferases, class-I, pyridoxal-phosphate-binding site
PGSC0003DMG400002038	Protein kinase, catalytic domain||Serine/threonine-protein kinase, active site||Protein kinase, ATP binding site||Concanavalin A-like lectin/glucanase, subgroup||Protein kinase-like domain||Wall-associated receptor kinase galacturonan-binding domain||Serine-threonine/tyrosine-protein kinase catalytic domain
PGSC0003DMG400002042	Phosphoenolpyruvate carboxykinase, C-terminal||Phosphoenolpyruvate carboxykinase, ATP-utilising||Phosphoenolpyruvate carboxykinase, N-terminal
PGSC0003DMG400002071	Pentatricopeptide repeat||Tetratricopeptide-like helical
PGSC0003DMG400002086	Vacuolar protein sorting-associated, VPS28, C-terminal||Vacuolar protein sorting-associated, VPS28, N-terminal||Vacuolar protein sorting-associated, VPS28
PGSC0003DMG400002105	Gene of unknown function
PGSC0003DMG400002120	Ribosomal protein S21e, conserved site||Ribosomal protein S21e
PGSC0003DMG400002127	Gene of unknown function
PGSC0003DMG400002139	Transcription factor GRAS
PGSC0003DMG400002161	SIS
PGSC0003DMG400002199	Galactose-binding domain-like||PITH domain
PGSC0003DMG400002204	Alpha/Beta hydrolase fold||Ndr
PGSC0003DMG400002290	Domain of unknown function DUF221||Domain of unknown function DUF4463
PGSC0003DMG400002319	Fanconi Anaemia group E protein, C-terminal
PGSC0003DMG400002336	Aldo/keto reductase||NADP-dependent oxidoreductase domain
PGSC0003DMG400002389	Chaperonin Cpn10, conserved site||Chaperonin 21, chloroplast||Chaperonin Cpn10||GroES-like
PGSC0003DMG400002411	Zinc finger, C2H2||Zinc finger, C2H2-like
PGSC0003DMG400002432	Gene of unknown function
PGSC0003DMG400002482	GTP binding domain||GTP1/OBG, conserved site||TGS-like||Small GTP-binding protein domain||P-loop containing nucleoside triphosphate hydrolase||TGS
PGSC0003DMG400002485	Zinc finger, PHD-finger||Zinc finger, FYVE/PHD-type||Zinc finger, RING/FYVE/PHD-type||Protein of unknown function DUF3594||Zinc finger, PHD-type||Zinc finger, PHD-type, conserved site
PGSC0003DMG400002495	Zinc finger, C2H2-like||Zinc finger C2H2-type/integrase DNA-binding domain||Zinc finger, C2H2
PGSC0003DMG400002500	Conserved gene of unknown function
PGSC0003DMG400002505	Nucleotide-binding, alpha-beta plait||RNA recognition motif domain
PGSC0003DMG400002534	Nucleoporin, NUP53||RNA-recognition motif (RRM) Nup35-type domain
PGSC0003DMG400002584	Tudor-like, plant||Agenet-like domain||Protein of unknown function DUF724
PGSC0003DMG400002585	Chaperonin Cpn60/TCP-1||GroEL-like apical domain||Chaperonin Cpn60||Chaperonin Cpn60, conserved site||GroEL-like equatorial domain
PGSC0003DMG400002611	Gene of unknown function
PGSC0003DMG400002639	Tetratricopeptide repeat||Tetratricopeptide repeat-containing domain||N-terminal acetyltransferase A, auxiliary subunit||Tetratricopeptide-like helical
PGSC0003DMG400002641	Ran binding domain||Nuclear pore complex, NUP2/50/61||Pleckstrin homology-like domain
PGSC0003DMG400002658	Alpha/Beta hydrolase fold
PGSC0003DMG400002660	Basic-leucine zipper domain
PGSC0003DMG400002669	Metallo-dependent phosphatase-like||Metallophosphoesterase domain||DNA repair protein Mre11
PGSC0003DMG400002671	G10 protein||BUD31/G10-related, conserved site
PGSC0003DMG400002678	Conserved gene of unknown function
PGSC0003DMG400002681	Aminotransferase-like, plant mobile domain
PGSC0003DMG400002689	Protein kinase-like domain||Protein kinase, catalytic domain||Serine-threonine/tyrosine-protein kinase catalytic domain||Leucine-rich repeat
PGSC0003DMG400002693	Protein kinase, catalytic domain||Serine/threonine-protein kinase, active site||Protein kinase, ATP binding site||Protein kinase-like domain
PGSC0003DMG400002700	F-box associated domain, type 3||F-box associated interaction domain
PGSC0003DMG400002710	SANT/Myb domain||Myb-like domain
PGSC0003DMG400002713	Serine/threonine-specific protein phosphatase/bis(5-nucleosyl)-tetraphosphatase||Metallophosphoesterase domain||Metallo-dependent phosphatase-like
PGSC0003DMG400002717	RNA polymerase II, large subunit, CTD||ENTH/VHS||Zinc finger, C2H2-like||RNA polymerase II-binding domain||Zinc finger, C2H2
PGSC0003DMG400002745	Cold acclimation WCOR413
PGSC0003DMG400002747	Serine/threonine- / dual-specificity protein kinase, catalytic domain||Protein kinase, ATP binding site||Protein kinase-like domain||Protein kinase, catalytic domain||Serine/threonine-protein kinase, active site
PGSC0003DMG400002758	Tudor-like, plant||Agenet-like domain
PGSC0003DMG400002759	Armadillo||Armadillo-like helical||Importin-alpha, importin-beta-binding domain||Armadillo-type fold||Importin subunit alpha
PGSC0003DMG400002762	-||Ferroporti-1||Major facilitator superfamily domain, general substrate transporter
PGSC0003DMG400002802	Pentatricopeptide repeat||Tetratricopeptide-like helical
PGSC0003DMG400002818	Appr-1-p processing||CRAL-TRIO domain
PGSC0003DMG400002852	TMP21-related||GOLD
PGSC0003DMG400002871	Gag-polypeptide of LTR copia-type
PGSC0003DMG400002883	YABBY protein||High mobility group, superfamily
PGSC0003DMG400002884	Protein kinase, ATP binding site||Serine/threonine- / dual-specificity protein kinase, catalytic domain||NAF/FISL domain||Protein kinase-like domain||Serine/threonine-protein kinase, active site||Protein kinase, catalytic domain||NAF domain
PGSC0003DMG400002885	Leucine-rich repeat-containing N-terminal, type 2||Leucine-rich repeat
PGSC0003DMG400002890	SPX, N-terminal
PGSC0003DMG400002892	Pectin lyase fold||Glycoside hydrolase, family 28||Pectin lyase fold/virulence factor
PGSC0003DMG400002918	Heat shock protein DnaJ, cysteine-rich domain||Methyltransferase FkbM||S-adenosyl-L-methionine-dependent methyltransferase-like
PGSC0003DMG400002928	Alpha crystallin/Hsp20 domain||HSP20-like chaperone
PGSC0003DMG400002931	Pectin lyase fold/virulence factor||Parallel beta-helix repeat||Glycoside hydrolase, family 28||Pectin lyase fold
PGSC0003DMG400002933	PMR5 N-terminal domain||PC-Esterase
PGSC0003DMG400002946	UDP-glucuronosyl/UDP-glucosyltransferase
PGSC0003DMG400002947	NB-ARC||P-loop containing nucleoside triphosphate hydrolase
PGSC0003DMG400002953	NADH:flavin oxidoreductase/NADH oxidase, N-terminal||Aldolase-type TIM barrel||Glutaredoxin||Thioredoxin-like fold
PGSC0003DMG400002967	Rieske [2Fe-2S] iron-sulphur domain
PGSC0003DMG400002985	Bacterial surface antigen (D15)
PGSC0003DMG400002990	Conserved gene of unknown function
PGSC0003DMG400003007	Protein kinase-like domain||Protein kinase, catalytic domain||Serine-threonine/tyrosine-protein kinase catalytic domain
PGSC0003DMG400003013	Glycoside hydrolase family 3||Glycoside hydrolase, family 3, N-terminal||Glycoside hydrolase, superfamily||Glycoside hydrolase family 3 C-terminal domain
PGSC0003DMG400003035	Protein kinase-like domain||Protein kinase, ATP binding site||Serine/threonine-protein kinase, active site||Protein kinase, catalytic domain||Serine-threonine/tyrosine-protein kinase catalytic domain
PGSC0003DMG400003036	IQ motif, EF-hand binding site||Domain of unknown function DUF4005
PGSC0003DMG400003050	Peptidase S54, rhomboid domain||Peptidase S54, rhomboid
PGSC0003DMG400003078	ABC transporter-like||ABC transporter, transmembrane domain||AAA+ ATPase domain||ABC transporter, conserved site||ABC transporter, transmembrane domain, type 1||P-loop containing nucleoside triphosphate hydrolase
PGSC0003DMG400003081	DNA-binding TFAR19-related protein
PGSC0003DMG400003083	Cold acclimation WCOR413
PGSC0003DMG400003089	Oxoglutarate/iron-dependent dioxygenase||Non-haem dioxygenase N-terminal domain||Isopenicillin N synthase-like
PGSC0003DMG400003138	Translation elongation factor Ts, conserved site||Ubiquitin-associated/translation elongation factor EF1B, N-terminal||Nucleic acid-binding, OB-fold||UBA-like||RNA-binding domain, S1||Ribosomal protein S1, RNA-binding domain||Translation elongation factor EFTs/EF1B, dimerisation||Translation elongation factor EFTs/EF1B
PGSC0003DMG400003155	Domain of unknown function DUF4009||AMP-binding, conserved site||AMP-dependent synthetase/ligase
PGSC0003DMG400003164	Conserved gene of unknown function
PGSC0003DMG400003186	Gene of unknown function
PGSC0003DMG400003189	Protein of unknown function DUF1068
PGSC0003DMG400003195	Leucine-rich repeat
PGSC0003DMG400003213	Protein kinase, catalytic domain||Serine/threonine-protein kinase, active site||Protein kinase-like domain||Protein kinase, ATP binding site||EF-hand-like domain||Serine/threonine- / dual-specificity protein kinase, catalytic domain
PGSC0003DMG400003246	Heat shock protein 70kD, C-terminal domain||Heat shock protein 70 family
PGSC0003DMG400003266	Methyltransferase type 11||S-adenosyl-L-methionine-dependent methyltransferase-like
PGSC0003DMG400003300	ELMO domain-containing protein
PGSC0003DMG400003302	RNA recognition motif domain||Nucleotide-binding, alpha-beta plait
PGSC0003DMG400003324	FAD dependent oxidoreductase||Squalene epoxidase||Aromatic-ring hydroxylase-like
PGSC0003DMG400003358	Exostosin-like
PGSC0003DMG400003393	Protein of unknown function DUF869, plant
PGSC0003DMG400003401	Pentatricopeptide repeat||Tetratricopeptide-like helical
PGSC0003DMG400003407	Zinc finger, lateral root primordium type 1||Lateral Root Primordium type 1, C-terminal||Protein of unknown function DUF702
PGSC0003DMG400003485	Plastid lipid-associated protein/fibrillin conserved domain
PGSC0003DMG400003487	Dolichol phosphate-mannose biosynthesis regulatory
PGSC0003DMG400003492	Nucleotide-binding, alpha-beta plait||RNA recognition motif domain
PGSC0003DMG400003501	ESCRT-II complex, vps25 subunit||Winged helix-turn-helix transcription repressor DNA-binding||ESCRT-II complex, Vps25 subunit, N-terminal winged helix
PGSC0003DMG400003502	Gene of unknown function
PGSC0003DMG400003507	Clathrin, heavy chain/VPS, 7-fold repeat||Vacuolar sorting protein 39/Transforming growth factor beta receptor-associated domain 1||Vacuolar sorting protein 39/Transforming growth factor beta receptor-associated domain 2
PGSC0003DMG400003512	Multicopper oxidase, copper-binding site||Cupredoxin||Multicopper oxidase, type 3||Laccase||Multicopper oxidase, type 2||Multicopper oxidase, type 1
PGSC0003DMG400003541	Transcription factor, MADS-box||Transcription factor, K-box
PGSC0003DMG400003547	Uncharacterised protein family UPF0183
PGSC0003DMG400003564	Serine/threonine-protein kinase, active site||Protein kinase, catalytic domain||Protein kinase-like domain||Serine/threonine- / dual-specificity protein kinase, catalytic domain||EF-Hand 1, calcium-binding site||Calcium-binding EF-hand||EF-hand-like domain||Protein kinase, ATP binding site
PGSC0003DMG400003588	NUC153
PGSC0003DMG400003593	Bifunctional nuclease
PGSC0003DMG400003629	ATPase, F0/V0 complex, subunit C||ATPase, V0 complex, proteolipid subunit C, eukaryotic||ATPase, V0 complex, proteolipid subunit C
PGSC0003DMG400003663	Conserved gene of unknown function
PGSC0003DMG400003681	Purine 5'-nucleotidase||HAD-like domain||HAD-superfamily hydrolase, subfamily IG, 5'-nucleotidase
PGSC0003DMG400003691	NmrA-like||NAD(P)-binding domain
PGSC0003DMG400003700	Mitogen-activated protein (MAP) kinase, conserved site||Protein kinase, catalytic domain||Serine/threonine-protein kinase, active site||Protein kinase, ATP binding site||Serine/threonine- / dual-specificity protein kinase, catalytic domain||Protein kinase-like domain
PGSC0003DMG400003739	Conserved gene of unknown function
PGSC0003DMG400003747	Chloramphenicol acetyltransferase-like domain||Transferase
PGSC0003DMG400003770	TLDc
PGSC0003DMG400003774	Glycoside hydrolase, family 9, active site||Six-hairpin glycosidase-like||Six-hairpin glycosidase||Glycoside hydrolase, family 9
PGSC0003DMG400003775	Tetrapyrrole methylase, subdomain 2||Tetrapyrrole methylase||Diphthine synthase||Tetrapyrrole methylase, subdomain 1
PGSC0003DMG400003797	F-box associated interaction domain||F-box domain, cyclin-like
PGSC0003DMG400003820	Major facilitator superfamily domain, general substrate transporter||Proton-dependent oligopeptide transporter family
PGSC0003DMG400003844	Rossmann-like alpha/beta/alpha sandwich fold||tRNA-specific 2-thiouridylase||Adenine nucleotide alpha hydrolase-like domains
PGSC0003DMG400003848	Sugar/inositol transporter||Sugar transporter, conserved site||Major facilitator superfamily domain||General substrate transporter||Major facilitator superfamily domain, general substrate transporter
PGSC0003DMG400003859	Domain of unknown function DUF1605||P-loop containing nucleoside triphosphate hydrolase||Helicase, C-terminal||Helicase-associated domain
PGSC0003DMG400003866	Concanavalin A-like lectin/glucanases superfamily||Glycoside hydrolase, family 16||Concanavalin A-like lectin/glucanase, subgroup||Xyloglucan endo-transglycosylase, C-terminal||Xyloglucan endotransglucosylase/hydrolase
PGSC0003DMG400003868	ACT domain
PGSC0003DMG400003889	AAA+ ATPase domain||ABC transporter, conserved site||ABC transporter, transmembrane domain||ABC transporter-like||P-loop containing nucleoside triphosphate hydrolase||ABC transporter, transmembrane domain, type 1
PGSC0003DMG400003894	Protein of unknown function DUF1624
PGSC0003DMG400003896	Cyclophilin-like peptidyl-prolyl cis-trans isomerase domain||Cyclophilin-like domain
PGSC0003DMG400003897	Zinc finger, RING-type||Zinc finger, RING/FYVE/PHD-type||Zinc finger, CTCHY-type||Rubredoxin-type fold||Zinc finger, CHY-type
PGSC0003DMG400003902	Zinc finger, FYVE/PHD-type||Zinc finger, PHD-finger||Acyl-CoA N-acyltransferase||Zinc finger, RING-type||Zinc finger, RING/FYVE/PHD-type||Zinc finger, PHD-type||Zinc finger, PHD-type, conserved site
PGSC0003DMG400003903	ATSMC2
PGSC0003DMG400003915	WRC
PGSC0003DMG400003923	Double Clp-N motif||Clp, N-terminal
PGSC0003DMG400003927	F-box domain, cyclin-like||Protein of unknown function DUF295
PGSC0003DMG400003959	Maspardin||Alpha/Beta hydrolase fold
PGSC0003DMG400003974	Tudor-like, plant||Agenet-like domain
PGSC0003DMG400003981	Acetylglutamate kinase||Aspartate/glutamate/uridylate kinase||Glutamate/acetylglutamate kinase
PGSC0003DMG400004006	AP2/ERF domain||DNA-binding, integrase-type
PGSC0003DMG400004052	Armadillo-like helical||HEAT, type 2||Armadillo-type fold
PGSC0003DMG400004058	Protein kinase-like domain||Protein kinase, catalytic domain||Serine/threonine-protein kinase, active site
PGSC0003DMG400004101	HAD-like domain||ATPase, P-type, cytoplasmic domain N||ATPase, P-type, transmembrane domain||ATPase, P-type, K/Mg/Cd/Cu/Zn/Na/Ca/Na/H-transporter||ATPase, P-type phosphorylation site||ATPase, P-type cation-transporter, N-terminal||ATPase, P-type, ATPase-associated domain||ATPase, P-type, plasma-membrane proton-efflux
PGSC0003DMG400004113	K+ potassium transporter
PGSC0003DMG400004127	NHL repeat||Six-bladed beta-propeller, TolB-like
PGSC0003DMG400004129	Transcription factor MYC/MYB N-terminal
PGSC0003DMG400004142	Gene of unknown function
PGSC0003DMG400004146	Leucine rich repeats (2 copies)||Protein kinase-like domain||Protein kinase, ATP binding site||Serine/threonine-protein kinase, active site||Leucine-rich repeat-containing N-terminal, type 2||Protein kinase, catalytic domain||Leucine-rich repeat
PGSC0003DMG400004163	Conserved gene of unknown function
PGSC0003DMG400004167	P-loop containing nucleoside triphosphate hydrolase||GTP binding domain||GTP-binding protein, ribosome biogenesis, YsxC
PGSC0003DMG400004170	Rossmann-like alpha/beta/alpha sandwich fold||Asparagine synthase, glutamine-hydrolyzing||Class II glutamine amidotransferase domain||Nucleophile aminohydrolases, N-terminal||Asparagine synthase||Glutamine amidotransferase type 2 domain
PGSC0003DMG400004233	Drug/metabolite transporter
PGSC0003DMG400004235	Ribonuclease P/MRP, subunit p29||Reverse transcriptase zinc-binding domain||Rof/RNase P-like
PGSC0003DMG400004333	Conserved gene of unknown function
PGSC0003DMG400004335	SWEET sugar transporter, plants
PGSC0003DMG400004337	SWEET sugar transporter, plants
PGSC0003DMG400004345	Gene of unknown function
PGSC0003DMG400004351	RFR1
PGSC0003DMG400004374	Synaptobrevin||Longin-like domain||Longin domain
PGSC0003DMG400004385	Gene of unknown function
PGSC0003DMG400004394	Legume lectin domain||Legume lectin, alpha chain, conserved site||Concanavalin A-like lectin/glucanase, subgroup||Concanavalin A-like lectin/glucanases superfamily
PGSC0003DMG400004431	Conserved gene of unknown function
PGSC0003DMG400004445	Alpha/Beta hydrolase fold||Partial AB-hydrolase lipase domain
PGSC0003DMG400004465	Gene of unknown function
PGSC0003DMG400004509	LPA2
PGSC0003DMG400004511	Cyclin-like||Cyclin, C-terminal
PGSC0003DMG400004525	ATP binding protein
PGSC0003DMG400004542	Radical SAM||Flavodoxin||Aldolase-type TIM barrel||Flavodoxin/nitric oxide synthase||tRNA wybutosine-synthesis||Flavoprotein-like
PGSC0003DMG400004557	PTAC6
PGSC0003DMG400004580	Helix-loop-helix domain
PGSC0003DMG400004583	JAB1/Mov34/MPN/PAD-1||Eukaryotic translation initiation factor 3 subunit H
PGSC0003DMG400004584	WD40-repeat-containing domain||WD40/YVTN repeat-like-containing domain||WD40 repeat
PGSC0003DMG400004588	ENTH/VHS||Epsin domain, N-terminal||Epsin-like, N-terminal
PGSC0003DMG400004599	Proteinase inhibitor I25, cystatin
PGSC0003DMG400004604	DDB2
PGSC0003DMG400004609	NIG
PGSC0003DMG400004613	NDF1
PGSC0003DMG400004634	ORF106F
PGSC0003DMG400004641	Protein of unknown function DUF604
PGSC0003DMG400004644	Tetratricopeptide repeat 11 Fission 1 protein||Fis1, C-terminal tetratricopeptide repeat||Tetratricopeptide-like helical||Fis1, N-terminal tetratricopeptide repeat
PGSC0003DMG400004647	SIS
PGSC0003DMG400004648	GTP binding domain||GTP-binding protein, orthogonal bundle domain||P-loop containing nucleoside triphosphate hydrolase
PGSC0003DMG400004652	ACI1
PGSC0003DMG400004657	Magnesium transporter NIPA
PGSC0003DMG400004670	Xyloglucan endotransglucosylase/hydrolase||Glycoside hydrolase, family 16, active site||Xyloglucan endo-transglycosylase, C-terminal||Concanavalin A-like lectin/glucanase, subgroup||Glycoside hydrolase, family 16||Concanavalin A-like lectin/glucanases superfamily
PGSC0003DMG400004674	RDM4
PGSC0003DMG400004705	Conserved gene of unknown function
PGSC0003DMG400004710	S-adenosyl-L-methionine-dependent methyltransferase-like||Protein arginine N-methyltransferase
PGSC0003DMG400004711	Tetratricopeptide-like helical||Pentatricopeptide repeat
PGSC0003DMG400004715	Pathogenic type III effector avirulence factor Avr cleavage site
PGSC0003DMG400004725	Leucine rich repeats (2 copies)||Leucine-rich repeat-containing N-terminal, type 2||Leucine-rich repeat
PGSC0003DMG400004739	Peptidase C13, legumain
PGSC0003DMG400004754	Zinc finger, CCHC-type||Zinc finger, HIT-type
PGSC0003DMG400004789	Cupredoxin||Multicopper oxidase, type 3||Multicopper oxidase, type 1||Multicopper oxidase, type 2
PGSC0003DMG400004816	Drug/metabolite transporter
PGSC0003DMG400004820	Domain of unknown function DUF547||Ternary complex factor MIP1, leucine-zipper
PGSC0003DMG400004844	Glucose-methanol-choline oxidoreductase, N-terminal||Glucose-methanol-choline oxidoreductase||Glucose-methanol-choline oxidoreductase, C-terminal
PGSC0003DMG400004852	Conserved gene of unknown function
PGSC0003DMG400004953	Homeodomain||KNOX2||KNOX1||ELK||Homeobox, conserved site||Homeobox KN domain||Homeodomain-like
PGSC0003DMG400004961	Amino acid transporter, transmembrane
PGSC0003DMG400004966	Leucine-rich repeat||Protein kinase-like domain||Protein kinase, ATP binding site||Leucine-rich repeat-containing N-terminal, type 2||Serine/threonine-protein kinase, active site||Protein kinase, catalytic domain
PGSC0003DMG400004975	Flavoprotein
PGSC0003DMG400004980	Major intrinsic protein, conserved site||Major intrinsic protein||Aquaporin-like
PGSC0003DMG400004985	BTB/POZ-like||FAD-dependent glycerol-3-phosphate dehydrogenase||TRAF-like||BTB/POZ fold||BTB/POZ||BTB/Kelch-associated
PGSC0003DMG400004995	Conserved gene of unknown function
PGSC0003DMG400005007	Protein of unknown function DUF604
PGSC0003DMG400005040	UbiB domain||Protein kinase-like domain
PGSC0003DMG400005052	Leucine-rich repeat||NB-ARC||P-loop containing nucleoside triphosphate hydrolase
PGSC0003DMG400005065	NAD(P)-binding domain||NAD-dependent epimerase/dehydratase
PGSC0003DMG400005080	SUF system FeS cluster assembly, SufB||SUF system FeS cluster assembly, SufBD
PGSC0003DMG400005136	2-hydroxyacid dehydrogenase
PGSC0003DMG400005149	Protein phosphatase 2C-like
PGSC0003DMG400005186	WD40-repeat-containing domain||LisH dimerisation motif||WD40/YVTN repeat-like-containing domain||WD40 repeat, conserved site||WD40 repeat||G-protein beta WD-40 repeat||CTLH, C-terminal LisH motif
PGSC0003DMG400005200	START-like domain||Streptomyces cyclase/dehydrase
PGSC0003DMG400005226	Leucine-rich repeat-containing N-terminal, type 2||Leucine-rich repeat
PGSC0003DMG400005253	Conserved gene of unknown function
PGSC0003DMG400005254	Leucine-rich repeat||Leucine-rich repeat-containing N-terminal, type 2||Protein kinase, catalytic domain||Leucine rich repeats (2 copies)||Protein kinase-like domain||Protein kinase, ATP binding site
PGSC0003DMG400005276	NIF system FeS cluster assembly, NifU, C-terminal
PGSC0003DMG400005284	Shikimate, quinate/shikimate dehydrogenase||Aldolase-type TIM barrel||Quinate/shikimate 5-dehydrogenase/glutamyl-tRNA reductase||NAD(P)-binding domain||Shikimate dehydrogenase substrate binding, N-terminal||Dehydroquinase class I
PGSC0003DMG400005324	Ribosomal protein L9||Ribosomal protein L9/RNase H1, N-terminal||Ribosomal protein L9, N-terminal
PGSC0003DMG400005328	Ring finger protein
PGSC0003DMG400005334	Glutaredoxin-like, plant II||Glutaredoxin||Glutaredoxin subgroup||Thioredoxin-like fold
PGSC0003DMG400005339	Peptidase S9B, dipeptidylpeptidase IV N-terminal||WD40/YVTN repeat-like-containing domain||WD40-like Beta Propeller||Six-bladed beta-propeller, TolB-like
PGSC0003DMG400005344	Anti-PCD protein
PGSC0003DMG400005346	Conserved gene of unknown function?
PGSC0003DMG400005367	Nucleic acid binding protein
PGSC0003DMG400005432	STAG
PGSC0003DMG400005454	Zinc finger, RING/FYVE/PHD-type||Zinc finger, UBP-type||Histone deacetylase superfamily
PGSC0003DMG400005465	Cytochrome b5, heme-binding site||Cytochrome b5
PGSC0003DMG400005483	AAA+ ATPase domain||ABC transporter, conserved site||ABC transporter, transmembrane domain||ABC transporter-like||P-loop containing nucleoside triphosphate hydrolase||ABC transporter, transmembrane domain, type 1
PGSC0003DMG400005515	Multicopper oxidase, type 2||L-ascorbate oxidase, plants||Multicopper oxidase, type 1||Cupredoxin||Multicopper oxidase, copper-binding site||Multicopper oxidase, type 3
PGSC0003DMG400005529	Conserved gene of unknown function
PGSC0003DMG400005542	Leucine-rich repeat||Leucine-rich repeat-containing N-terminal, type 2
PGSC0003DMG400005609	WD40 repeat, conserved site||WD40 repeat||WD40/YVTN repeat-like-containing domain||WD40-repeat-containing domain
PGSC0003DMG400005610	Zinc finger, RING-type||Zinc finger, RING/FYVE/PHD-type||Zinc finger, UBP-type||BRCA1-associated 2
PGSC0003DMG400005655	WD40 repeat||WD40 repeat, conserved site||WD40-repeat-containing domain||WD40/YVTN repeat-like-containing domain
PGSC0003DMG400005688	Domain of unknown function DUF292, eukaryotic
PGSC0003DMG400005738	Haem peroxidase||Haem peroxidase, animal
PGSC0003DMG400005740	Drug/metabolite transporter
PGSC0003DMG400005752	Tetratricopeptide TPR2||Tetratricopeptide repeat-containing domain||Tetratricopeptide repeat||Amidase||Amidase signature domain||Tetratricopeptide-like helical
PGSC0003DMG400005780	Major intrinsic protein, conserved site||Major intrinsic protein||Aquaporin-like
PGSC0003DMG400005787	Coiled-coil domain-containing protein
PGSC0003DMG400005799	Thioredoxin-like fold||UBX||Ubiquitin-related domain||UAS
PGSC0003DMG400005804	Zinc finger, RING-CH-type||Zinc finger, RING/FYVE/PHD-type
PGSC0003DMG400005809	Gene of unknown function
PGSC0003DMG400005819	Nin one binding (NOB1) Zn-ribbon-like||D-site 20S pre-rRNA nuclease
PGSC0003DMG400005820	Serine/threonine dehydratase, pyridoxal-phosphate-binding site||Tryptophan synthase beta subunit-like PLP-dependent enzymes superfamily
PGSC0003DMG400005843	Protein of unknown function DUF4228
PGSC0003DMG400005844	Development/cell death domain
PGSC0003DMG400005845	Conserved gene of unknown function
PGSC0003DMG400005848	Homeodomain-like||SANT/Myb domain||Myb domain
PGSC0003DMG400005872	Plant peroxidase||Haem peroxidase||Haem peroxidase, plant/fungal/bacterial
PGSC0003DMG400005894	Transcription factor MYC/MYB N-terminal||Helix-loop-helix domain
PGSC0003DMG400005903	Serine/threonine protein phosphatase, BSU1||Serine/threonine-specific protein phosphatase/bis(5-nucleosyl)-tetraphosphatase||Metallophosphoesterase domain||Kelch-type beta propeller||Kelch repeat type 2||Metallo-dependent phosphatase-like
PGSC0003DMG400005918	Myb domain||SANT/Myb domain||Homeodomain-like
PGSC0003DMG400005919	Molybdopterin biosynthesis MoaE||Molybdopterin synthase catalytic subunit, eukaryotes
PGSC0003DMG400005947	Protein kinase, ATP binding site||Serine/threonine- / dual-specificity protein kinase, catalytic domain||Protein kinase-like domain||Protein kinase, catalytic domain||Serine/threonine-protein kinase, active site
PGSC0003DMG400005955	Protein kinase, catalytic domain||Protein kinase-like domain||Serine/threonine- / dual-specificity protein kinase, catalytic domain||Protein kinase, ATP binding site||Mitogen-activated protein (MAP) kinase, conserved site
PGSC0003DMG400005962	ERV/ALR sulphydryl oxidase||Thioredoxin domain||Thioredoxin, conserved site||Thioredoxin-like fold
PGSC0003DMG400005967	Multi antimicrobial extrusion protein
PGSC0003DMG400005997	Zinc finger, B-box
PGSC0003DMG400006019	Pentatricopeptide repeat
PGSC0003DMG400006075	Cytochrome P450, E-class, group I||Cytochrome P450||Cytochrome P450, conserved site
PGSC0003DMG400006107	F-box domain, cyclin-like||F-box associated interaction domain
PGSC0003DMG400006119	Gene of unknown function
PGSC0003DMG400006155	DNA-binding WRKY
PGSC0003DMG400006169	Nickel/cobalt transporter, high-affinity
PGSC0003DMG400006172	Gene of unknown function
PGSC0003DMG400006208	PetM of cytochrome b6/f complex subunit 7
PGSC0003DMG400006248	KS1 protein
PGSC0003DMG400006339	Sodium/potassium/calcium exchanger
PGSC0003DMG400006350	Armadillo-like helical||Pumilio RNA-binding repeat||Armadillo-type fold||Nucleic acid binding NABP
PGSC0003DMG400006363	DNA/RNA-binding protein Alba-like
PGSC0003DMG400006429	Protein-tyrosine phosphatase, dual specificity phosphatase, eukaryotic||Protein-tyrosine phosphatase, SIW14-like||Protein-tyrosine phosphatase, active site||Protein-tyrosine phosphatase-like
PGSC0003DMG400006432	Exostosin-like
PGSC0003DMG400006446	Dymeclin
PGSC0003DMG400006448	S-adenosyl-L-methionine-dependent methyltransferase-like||O-methyltransferase, family 3
PGSC0003DMG400006482	DNA-binding, integrase-type||AP2/ERF domain
PGSC0003DMG400006491	Ribosomal protein L28e||Ribosomal L28e/Mak16
PGSC0003DMG400006497	PC-Esterase
PGSC0003DMG400006523	Protein of unknown function DUF247, plant
PGSC0003DMG400006539	GrpE nucleotide exchange factor||GrpE nucleotide exchange factor, head||GrpE nucleotide exchange factor, coiled-coil
PGSC0003DMG400006556	Fatty acid hydroxylase
PGSC0003DMG400006558	Mog1/PsbP, alpha/beta/alpha sandwich||Ran-interacting Mog1 protein
PGSC0003DMG400006569	Helix-loop-helix domain
PGSC0003DMG400006578	Protein of unknown function DUF1264
PGSC0003DMG400006590	Pyruvate kinase, barrel||Pyruvate kinase, C-terminal||Pyruvate kinase, active site||Pyruvate kinase, beta-barrel insert domain||Pyruvate kinase-like, insert domain||Pyruvate kinase, alpha/beta||Pyruvate kinase||Pyruvate/Phosphoenolpyruvate kinase
PGSC0003DMG400006604	DNA-binding, integrase-type||AP2/ERF domain
PGSC0003DMG400006636	Sugar transporter, conserved site||Major facilitator superfamily domain||Sugar/inositol transporter||General substrate transporter||Major facilitator superfamily domain, general substrate transporter
PGSC0003DMG400006638	Gene of unknown function
PGSC0003DMG400006668	Conserved gene of unknown function
PGSC0003DMG400006672	Sucrose synthase||Sucrose synthase, plant/cyanobacteria||Glycosyl transferase, family 1
PGSC0003DMG400006683	Aminoacyl-tRNA synthetase, class II (D/K/N)-like
PGSC0003DMG400006731	Pyridoxal-phosphate binding site||Aldolase-type TIM barrel||Alpha-isopropylmalate/homocitrate synthase, conserved site||Pyridoxal phosphate-dependent decarboxylase||Pyridoxal phosphate-dependent transferase, major domain||Pyruvate carboxyltransferase||Pyridoxal phosphate-dependent transferase, major region, subdomain 1
PGSC0003DMG400006777	GNAT domain||Acyl-CoA N-acyltransferase
PGSC0003DMG400006782	Protein of unknown function DUF3411
PGSC0003DMG400006784	Small-subunit processome, Utp21||WD40 repeat||WD40 repeat, conserved site||WD40/YVTN repeat-like-containing domain||WD40-repeat-containing domain
PGSC0003DMG400006807	Zinc finger, RING-type||Zinc finger, RING/FYVE/PHD-type||-
PGSC0003DMG400006821	Pentatricopeptide repeat-containing protein
PGSC0003DMG400006825	F-box domain, cyclin-like
PGSC0003DMG400006855	Sterol methyltransferase C-terminal||ERGosterol biosynthesis methyltransferase||S-adenosyl-L-methionine-dependent methyltransferase-like||Methyltransferase type 11
PGSC0003DMG400006857	Zinc/iron permease
PGSC0003DMG400006892	Ribosomal protein L34Ae||Protein of unknown function DUF1666
PGSC0003DMG400006903	NADH-ubiquinone reductase complex 1 MLRQ subunit
PGSC0003DMG400006912	Gnk2-homologous domain||Protein kinase, catalytic domain||Serine/threonine-protein kinase, active site||Protein kinase, ATP binding site||Concanavalin A-like lectin/glucanase, subgroup||Protein kinase-like domain
PGSC0003DMG400006988	Homeodomain-like||Myb domain, plants||SANT/Myb domain
PGSC0003DMG400006993	Peroxidases heam-ligand binding site||Haem peroxidase, plant/fungal/bacterial||Peroxidase, active site||Haem peroxidase||Plant peroxidase
PGSC0003DMG400007010	Transcription factor MYC/MYB N-terminal||Helix-loop-helix domain
PGSC0003DMG400007020	P-loop containing nucleoside triphosphate hydrolase||DNA recombination and repair protein, RecA-like||DNA recombination/repair protein RecA/RadB, ATP-binding domain||DNA recombination and repair protein Rad51, C-terminal
PGSC0003DMG400007024	Proteophosphoglycan ppg4
PGSC0003DMG400007037	Phosphatidylinositol 3-/4-kinase, catalytic domain||Protein kinase-like domain||Ubiquitin||Ubiquitin-related domain
PGSC0003DMG400007056	Chalcone isomerase||Chalcone isomerase, 3-layer sandwich
PGSC0003DMG400007070	Zinc finger, PARP-type||HAD-like domain||HAD-superfamily hydrolase, subfamily IIIA||Polynucleotide 3'-phosphatase||Polynucleotide kinase 3 phosphatase
PGSC0003DMG400007072	Peptide-N4-(N-acetyl-beta-glucosaminyl)asparagine amidase A
PGSC0003DMG400007076	Cytochrome P450
PGSC0003DMG400007090	Protein kinase-like domain||Protein kinase, catalytic domain||Serine/threonine-protein kinase, active site
PGSC0003DMG400007093	PMR5 N-terminal domain||PC-Esterase
PGSC0003DMG400007142	Alpha/Beta hydrolase fold
PGSC0003DMG400007145	Ribonuclease Zc3h12a-like
PGSC0003DMG400007170	Conserved gene of unknown function
PGSC0003DMG400007177	Tetratricopeptide-like helical||Elongated TPR repeat-containing domain||Peptidyl-prolyl cis-trans isomerase, FKBP-type, domain||Peptidyl-prolyl cis-trans isomerase, FKBP-type||Tetratricopeptide repeat||Tetratricopeptide repeat-containing domain
PGSC0003DMG400007187	Zinc finger, DHHC-type, palmitoyltransferase
PGSC0003DMG400007193	RNA recognition motif domain||Nucleotide-binding, alpha-beta plait
PGSC0003DMG400007238	Gene of unknown function
PGSC0003DMG400007239	BTB/POZ fold||BTB/POZ||BTB/POZ-like||NPH3 domain
PGSC0003DMG400007265	S-adenosyl-L-methionine-dependent methyltransferase-like||Mycolic acid cyclopropane synthase
PGSC0003DMG400007341	Chaperonin-like RbcX
PGSC0003DMG400007347	GINS complex, subunit Sld5||GINS complex
PGSC0003DMG400007358	Multi antimicrobial extrusion protein
PGSC0003DMG400007418	WD40 repeat||Cyclophilin-type peptidyl-prolyl cis-trans isomerase, conserved site||Cyclophilin-like peptidyl-prolyl cis-trans isomerase domain||Cyclophilin-like domain||WD40-repeat-containing domain||WD40/YVTN repeat-like-containing domain
PGSC0003DMG400007420	Uncharacterised protein family UPF0402
PGSC0003DMG400007424	Amino acid transporter, transmembrane
PGSC0003DMG400007426	SART-1 protein
PGSC0003DMG400007457	Helix-loop-helix domain
PGSC0003DMG400007514	Aldolase-type TIM barrel||Alpha-hydroxy acid dehydrogenase, FMN-dependent||FMN-dependent dehydrogenase||FMN-dependent alpha-hydroxy acid dehydrogenase, active site
PGSC0003DMG400007515	CDP-alcohol phosphatidyltransferase||Choline/ethanolamine phosphotransferase
PGSC0003DMG400007516	Conserved gene of unknown function
PGSC0003DMG400007555	JAB1/Mov34/MPN/PAD-1||USP8 dimerisation domain
PGSC0003DMG400007581	Conserved gene of unknown function
PGSC0003DMG400007588	Major facilitator superfamily domain, general substrate transporter||Organic anion transporter polypeptide OATP
PGSC0003DMG400007650	Peptidase C48, SUMO/Sentrin/Ubl1
PGSC0003DMG400007657	Uncharacterised protein family UPF0363
PGSC0003DMG400007678	Domain of unknown function DUF239||Domain of unknown function DUF4409
PGSC0003DMG400007679	Alpha/Beta hydrolase fold
PGSC0003DMG400007683	Sulphate anion transporter, conserved site||Sulphate anion transporter||STAS domain||Sulphate transporter
PGSC0003DMG400007713	Actin cross-linking||Protein of unknown function DUF569
PGSC0003DMG400007715	Zinc finger, C2H2||Zinc finger, C2H2-like
PGSC0003DMG400007743	NB-ARC||Leucine-rich repeat||AAA+ ATPase domain||Toll/interleukin-1 receptor homology (TIR) domain||P-loop containing nucleoside triphosphate hydrolase
PGSC0003DMG400007753	Wound-inducible basic
PGSC0003DMG400007760	Bet v I domain||START-like domain||Major latex protein domain
PGSC0003DMG400007792	Sodium/calcium exchanger membrane region
PGSC0003DMG400007793	Lipoxygenase, conserved site||Lipoxygenase, C-terminal||Lipoxygenase, iron binding site||Lipoxygenase, domain 3||Lipoxygenase||Lipoxygenase, plant
PGSC0003DMG400007819	Protein phosphatase 2C-like||Protein phosphatase 2C||Protein phosphatase 2C, manganese/magnesium aspartate binding site
PGSC0003DMG400007823	Myb domain, plants||Signal transduction response regulator, receiver domain||Response regulator, plant B-type||CheY-like superfamily||Homeodomain-like||SANT/Myb domain||Myb domain
PGSC0003DMG400007827	Helix-loop-helix domain
PGSC0003DMG400007831	Peptidase M17||Peptidase M17, leucyl aminopeptidase, N-terminal||Peptidase M17, leucyl aminopeptidase, C-terminal||Peptidase M17, leucine aminopeptidase
PGSC0003DMG400007849	ClpP/crotonase-like domain||Crotonase, core
PGSC0003DMG400007859	6-phosphogluconate dehydrogenase, C-terminal-like||NAD(P)-binding domain||Dehydrogenase, multihelical||Acetohydroxy acid isomeroreductase C-terminal||Acetohydroxy acid isomeroreductase, catalytic||Acetohydroxy acid isomeroreductase||Ketol-acid reductoisomerase
PGSC0003DMG400007862	Leucine-rich repeat||Serine-threonine/tyrosine-protein kinase catalytic domain||Protein kinase, catalytic domain||Leucine-rich repeat-containing N-terminal, type 2||Protein kinase-like domain
PGSC0003DMG400007879	Fatty acid hydroxylase||NAD(P)-binding domain||Uncharacterised domain Wax2, C-terminal
PGSC0003DMG400007882	eRF1 domain 3||eRF1 domain 2||50S ribosomal protein L30e-like||eRF1 domain 1/Pelota-like||Peptide chain release factor eRF1/aRF1||Peptide Chain Release Factor eRF1/aRF1, N-terminal
PGSC0003DMG400007896	Glycosyl transferase, family 8||Nucleotide-diphospho-sugar transferases
PGSC0003DMG400007900	Reticulon
PGSC0003DMG400007903	Ion transport domain||RmlC-like jelly roll fold||Cyclic nucleotide-binding domain||Potassium channel, voltage-dependent, EAG/ELK/ERG||Cyclic nucleotide-binding-like||IQ motif, EF-hand binding site
PGSC0003DMG400007908	UDP-glucuronosyl/UDP-glucosyltransferase
PGSC0003DMG400007912	Leucine-rich repeat
PGSC0003DMG400007914	C2 calcium-dependent membrane targeting
PGSC0003DMG400007948	Leucine-rich repeat||Protein kinase-like domain||Protein kinase, catalytic domain
PGSC0003DMG400007973	SCP2 sterol-binding domain
PGSC0003DMG400008014	Protein of unknown function DUF827, plant
PGSC0003DMG400008018	Peptidase S10, serine carboxypeptidase||Alpha/Beta hydrolase fold
PGSC0003DMG400008057	Homeobox KN domain||POX||Homeodomain||Homeodomain-like
PGSC0003DMG400008063	FAS1 domain
PGSC0003DMG400008075	P-loop containing nucleoside triphosphate hydrolase||Arsenical pump ATPase, ArsA/Get3||Anion-transporting ATPase-like domain
PGSC0003DMG400008076	Protein disulphide isomerase||Thioredoxin domain||Thioredoxin, conserved site||Thioredoxin-like fold||Disulphide isomerase
PGSC0003DMG400008077	Conserved gene of unknown function
PGSC0003DMG400008081	Aux/IAA-ARF-dimerisation||B3 DNA binding domain||AUX/IAA protein||Auxin response factor||DNA-binding pseudobarrel domain
PGSC0003DMG400008086	Protein of unknown function DUF707
PGSC0003DMG400008109	Glycoside hydrolase, family 35, conserved site||Galactose-binding domain-like||Glycoside hydrolase, family 35||Glycoside hydrolase, catalytic domain||Glycoside hydrolase, superfamily||D-galactoside/L-rhamnose binding SUEL lectin domain
PGSC0003DMG400008131	Glycosyl transferase, family 14
PGSC0003DMG400008148	CCAAT-binding transcription factor, subunit B
PGSC0003DMG400008154	Small GTPase superfamily||Small GTP-binding protein domain||P-loop containing nucleoside triphosphate hydrolase||Small GTPase superfamily, Rab type
PGSC0003DMG400008170	Alpha carbonic anhydrase||Carbonic anhydrase, alpha-class, conserved site||Carbonic anhydrase, alpha-class
PGSC0003DMG400008176	Guanylate kinase, sub-group||Guanylate kinase/L-type calcium channel||Guanylate kinase, conserved site||P-loop containing nucleoside triphosphate hydrolase||Guanylate kinase||Galactose oxidase/kelch, beta-propeller
PGSC0003DMG400008200	Mitochondrial carrier domain||Mitochondrial carrier protein||Mitochondrial substrate/solute carrier
PGSC0003DMG400008250	Gene of unknown function
PGSC0003DMG400008285	Ribosomal protein L18a/LX||Ribosomal protein L18a||50S ribosomal protein L18Ae/60S ribosomal protein L20 and L18a
PGSC0003DMG400008307	NAD(P)-binding domain
PGSC0003DMG400008313	Uncharacterised protein family Ycf23||Aldolase-type TIM barrel||Dihydropteroate synthase-like
PGSC0003DMG400008353	Mannose-binding lectin
PGSC0003DMG400008356	NAD(P)-binding domain||Glutamate/phenylalanine/leucine/valine dehydrogenase, C-terminal||Glutamate/phenylalanine/leucine/valine dehydrogenase, dimerisation domain||Glutamate/phenylalanine/leucine/valine dehydrogenase||Glutamate dehydrogenase
PGSC0003DMG400008366	H/ACA ribonucleoprotein complex, subunit Gar1, eukaryote||Translation elongation/initiation factor/Ribosomal, beta-barrel||H/ACA ribonucleoprotein complex, subunit Gar1/Naf1
PGSC0003DMG400008369	Phosphatidylinositol-4-phosphate 5-kinase, N-terminal domain||Phosphatidylinositol-4-phosphate 5-kinase, core||Phosphatidylinositol-4-phosphate 5-kinase, plant||Phosphatidylinositol-4-phosphate 5-kinase, core, subgroup||Phosphatidylinositol-4-phosphate 5-kinase, C-terminal||Phosphatidylinositol-4-phosphate 5-kinase||MORN motif
PGSC0003DMG400008373	Transcription factor E2F/dimerisation partner (TDP)||Transcription factor DP, C-terminal||Winged helix-turn-helix transcription repressor DNA-binding||Transcription factor DP
PGSC0003DMG400008384	Serine-threonine/tyrosine-protein kinase catalytic domain||Protein kinase-like domain||Protein kinase, ATP binding site||Serine/threonine-protein kinase, active site||Protein kinase, catalytic domain||Serine/threonine-protein kinase CTR1/EDR1||-
PGSC0003DMG400008396	Exostosin-like
PGSC0003DMG400008407	Lipase, GDSL||Esterase, SGNH hydrolase-type, subgroup
PGSC0003DMG400008411	Gene of unknown function
PGSC0003DMG400008415	Conserved gene of unknown function
PGSC0003DMG400008419	Serine-threonine/tyrosine-protein kinase catalytic domain||Protein kinase-like domain||Protein kinase, catalytic domain
PGSC0003DMG400008441	Heavy metal-associated domain, HMA
PGSC0003DMG400008442	Transcription factor GRAS
PGSC0003DMG400008455	Uncharacterised protein family UPF0497, trans-membrane plant subgroup||Uncharacterised protein family UPF0497, trans-membrane plant
PGSC0003DMG400008457	Small GTP-binding protein domain||Small GTPase superfamily, Rab type||P-loop containing nucleoside triphosphate hydrolase||Small GTPase superfamily
PGSC0003DMG400008458	Nucleic acid-binding, OB-fold
PGSC0003DMG400008461	Rho GDP-dissociation inhibitor domain||RHO protein GDP dissociation inhibitor||Immunoglobulin E-set
PGSC0003DMG400008484	C4-dicarboxylate transporter/malic acid transport protein
PGSC0003DMG400008518	Amidase signature domain||Amidase
PGSC0003DMG400008519	Metallophosphoesterase domain||Metallo-dependent phosphatase-like||Phosphoesterase At2g46880
PGSC0003DMG400008548	Conserved gene of unknown function
PGSC0003DMG400008551	Carbamoyl-phosphate synthase, large subunit, N-terminal||Biotin-binding site||ClpP/crotonase-like domain||Rudiment single hybrid motif||Carboxyl transferase||Carbamoyl-phosphate synthetase large subunit-like, ATP-binding domain||Acetyl-coenzyme A carboxyltransferase, N-terminal||Biotin carboxylation domain||Biotin/lipoyl attachment||Single hybrid motif||ATP-grasp fold, subdomain 1||ATP-grasp fold…
PGSC0003DMG400008556	Major intrinsic protein, conserved site||Aquaporin-like||Major intrinsic protein
PGSC0003DMG400008563	60S ribosomal protein L18a, plant?
PGSC0003DMG400008584	Tetratricopeptide repeat-containing domain||Tetratricopeptide-like helical
PGSC0003DMG400008598	Protein of unknown function DUF597
PGSC0003DMG400008639	Glycoside hydrolase-type carbohydrate-binding||-||Glycoside hydrolase-type carbohydrate-binding, subgroup
PGSC0003DMG400008675	Gene of unknown function
PGSC0003DMG400008677	No apical meristem (NAM) protein
PGSC0003DMG400008679	Ankyrin repeat-containing domain||Ankyrin repeat
PGSC0003DMG400008680	RNA recognition motif domain||Nucleotide-binding, alpha-beta plait
PGSC0003DMG400008687	Homeodomain-like||SANT/Myb domain||Myb domain
PGSC0003DMG400008690	Polyprenyl synthetase||Terpenoid synthase
PGSC0003DMG400008692	EF-Hand 1, calcium-binding site||EF-hand-like domain||Calcium-binding EF-hand
PGSC0003DMG400008703	Peptidase aspartic||Peptidase aspartic, active site||Peptidase A1
PGSC0003DMG400008709	Double-stranded RNA-binding-like
PGSC0003DMG400008710	2Fe-2S ferredoxin, iron-sulphur binding site||Aldehyde oxidase/xanthine dehydrogenase, a/b hammerhead||Aldehyde oxidase/xanthine dehydrogenase||CO dehydrogenase flavoprotein, C-terminal||2Fe-2S ferredoxin-type domain||CO dehydrogenase flavoprotein-like, FAD-binding, subdomain 2||FAD-binding, type 2||[2Fe-2S]-binding||Beta-grasp domain||Molybdopterin dehydrogenase, FAD-binding||Aldehyde oxidase/xa…
PGSC0003DMG400008716	Conserved gene of unknown function
PGSC0003DMG400008740	Aconitase/iron regulatory protein 2||Aconitase/isopropylmalate dehydratase||Aconitase/3-isopropylmalate dehydratase large subunit, alpha/beta/alpha||Aconitase A/isopropylmalate dehydratase small subunit, swivel||Aconitase family, 4Fe-4S cluster binding site||Aconitase/3-isopropylmalate dehydratase large subunit, alpha/beta/alpha, subdomain 2||Aconitase/3-isopropylmalate dehydratase, swivel||Aconi…
PGSC0003DMG400008749	Acyl transferase/acyl hydrolase/lysophospholipase||Patatin/Phospholipase A2-related
PGSC0003DMG400008750	Cytochrome P450, E-class, group I||Cytochrome P450||Cytochrome P450, conserved site||Acyl transferase/acyl hydrolase/lysophospholipase
PGSC0003DMG400008794	Major latex protein domain||START-like domain||Bet v I domain
PGSC0003DMG400008814	Prenylated rab acceptor PRA1
PGSC0003DMG400008824	Armadillo-type fold||Armadillo-like helical||Armadillo
PGSC0003DMG400008828	AAA+ ATPase domain||Peptidase M41, FtsH extracellular||ATPase, AAA-type, conserved site||P-loop containing nucleoside triphosphate hydrolase||ATPase, AAA-type, core||Peptidase, FtsH||Peptidase M41
PGSC0003DMG400008845	Zinc finger, RING-type||Zinc finger, RING/FYVE/PHD-type
PGSC0003DMG400008847	Hydantoinaseoxoprolinase, N-terminal||Hydantoinase B/oxoprolinase||Hydantoinase/oxoprolinase
PGSC0003DMG400008850	Short-chain dehydrogenase/reductase SDR||Glucose/ribitol dehydrogenase||NAD(P)-binding domain
PGSC0003DMG400008869	Condensation domain
PGSC0003DMG400008901	Chlorophyll a/b binding protein domain
PGSC0003DMG400008944	Pentatricopeptide repeat||Tetratricopeptide-like helical
PGSC0003DMG400008961	Lipase, GDSL||Esterase, SGNH hydrolase-type, subgroup
PGSC0003DMG400008962	Inosine/uridine-preferring nucleoside hydrolase||Inosine/uridine-preferring nucleoside hydrolase domain
PGSC0003DMG400008966	Gene of unknown function
PGSC0003DMG400008969	Gene of unknown function
PGSC0003DMG400008998	Forkhead-associated (FHA) domain||Protein phosphatase 2C||Protein phosphatase 2C, manganese/magnesium aspartate binding site||SMAD/FHA domain||Protein phosphatase 2C-like
PGSC0003DMG400009004	HSP40/DnaJ peptide-binding||Chaperone DnaJ, C-terminal||Heat shock protein DnaJ, N-terminal
PGSC0003DMG400009046	INO80 complex, subunit Ies2||Zinc finger, HIT-type||PAPA-1-like conserved region
PGSC0003DMG400009053	Agenet-like domain||Protein of unknown function DUF724||Tudor-like, plant
PGSC0003DMG400009079	Splicing factor SF3a60 binding domain||Zinc finger, C2H2-type matrin||Domain of unknown function DUF3449||Zinc finger, C2H2-like
PGSC0003DMG400009129	Zinc finger, RING/FYVE/PHD-type||Zinc finger, RING-type||Zinc finger, SIAH-type||Seven-in-absentia protein, TRAF-like domain||Seven In Absentia Homolog-type||Seven-in-absentia protein, sina||TRAF-like
PGSC0003DMG400009144	Synaptojanin, N-terminal
PGSC0003DMG400009153	GDP-fucose protein O-fucosyltransferase
PGSC0003DMG400009192	Mitochondrial carrier domain||Mitochondrial substrate/solute carrier||Mitochondrial carrier protein
PGSC0003DMG400009217	3-dehydroquinate synthase, prokaryotic-type
PGSC0003DMG400009219	Single hybrid motif||Chloramphenicol acetyltransferase-like domain||Biotin/lipoyl attachment||2-oxoacid dehydrogenase acyltransferase, catalytic domain||E3 binding||2-oxo acid dehydrogenase, lipoyl-binding site
PGSC0003DMG400009226	Mitochodrial transcription termination factor-related
PGSC0003DMG400009231	WD40-repeat-containing domain||WD40/YVTN repeat-like-containing domain||WD40 repeat, conserved site||WD40 repeat||Eukaryotic translation initiation factor 3 subunit I||G-protein beta WD-40 repeat
PGSC0003DMG400009290	Domain of unknown function DUF221||Domain of unknown function DUF4463
PGSC0003DMG400009300	Concanavalin A-like lectin/glucanases superfamily||Glycoside hydrolase, family 16||Concanavalin A-like lectin/glucanase, subgroup||Xyloglucan endo-transglycosylase, C-terminal
PGSC0003DMG400009313	Cytochrome P450, E-class, group I||Cytochrome P450||Cytochrome P450, conserved site
PGSC0003DMG400009317	P-loop containing nucleoside triphosphate hydrolase||Phosphoribulokinase||Phosphoribulokinase/uridine kinase
PGSC0003DMG400009332	TB2/DP1/HVA22-related protein||Zinc finger, C2H2||Ribonuclease H domain||Zinc finger, C2H2-like||Ribonuclease H-like domain
PGSC0003DMG400009349	Transcription factor, MADS-box||Transcription factor, K-box
PGSC0003DMG400009353	Tify||Zinc finger, GATA-type||Zinc finger, NHR/GATA-type||CCT domain
PGSC0003DMG400009360	Conserved gene of unknown function
PGSC0003DMG400009362	O-fucosyltransferase, plant||GDP-fucose protein O-fucosyltransferase
PGSC0003DMG400009388	Basic-leucine zipper domain
PGSC0003DMG400009397	Homeobox protein
PGSC0003DMG400009430	Amidase, hydantoinase/carbamoylase||Peptidase M20, dimerisation||Peptidase M20
PGSC0003DMG400009434	VQ motif-containing protein
PGSC0003DMG400009449	DOG1 domain||Basic-leucine zipper domain
PGSC0003DMG400009454	Peptidase A22B, signal peptide peptidase||Peptidase A22, presenilin signal peptide
PGSC0003DMG400009473	Cyclin C/H/T/L||CyclinH/Ccl1||Cyclin-like||Cyclin, N-terminal||Cyclin C/H
PGSC0003DMG400009483	P-loop containing nucleoside triphosphate hydrolase
PGSC0003DMG400009499	Protein kinase-like domain||Protein kinase, catalytic domain||Serine-threonine/tyrosine-protein kinase catalytic domain
PGSC0003DMG400009521	Gene of unknown function
PGSC0003DMG400009544	ChaC-like protein||Butirosin biosynthesis, BtrG-like
PGSC0003DMG400009588	Ribosomal protein S15||Ribosomal protein S15P||Ribosomal protein S13/S15, N-terminal||S15/NS1, RNA-binding
PGSC0003DMG400009589	Retroviral aspartyl protease||Zinc finger, CCHC-type
PGSC0003DMG400009665	No apical meristem (NAM) protein
PGSC0003DMG400009698	Glutamate synthase, central-N||Class II glutamine amidotransferase domain||Nucleophile aminohydrolases, N-terminal||Aldolase-type TIM barrel||Glutamate synthase, central-C||Glutamine amidotransferase type 2 domain||Glutamate synthase, alpha subunit, C-terminal
PGSC0003DMG400009729	Rubisco LS methyltransferase, substrate-binding domain||SET domain
PGSC0003DMG400009744	PfkB||Ribokinase-like||Carbohydrate/puine kinase, PfkB, conserved site||Ribokinase
PGSC0003DMG400009771	Gene of unknown function
PGSC0003DMG400009772	Proteasome, subunit alpha/beta||Proteasome B-type subunit||Nucleophile aminohydrolases, N-terminal||Peptidase T1A, proteasome beta-subunit||Proteasome, beta-type subunit, conserved site
PGSC0003DMG400009782	SWIB domain||SWIB/MDM2 domain
PGSC0003DMG400009839	Gene of unknown function
PGSC0003DMG400009880	Lipase, GDSL||Esterase, SGNH hydrolase-type, subgroup||Lipase, GDSL, active site
PGSC0003DMG400009892	Peptidase S9A, prolyl oligopeptidase||Peptidase S9A, oligopeptidase, N-terminal||Peptidase S9, serine active site||Peptidase S9, prolyl oligopeptidase, catalytic domain||Alpha/Beta hydrolase fold
PGSC0003DMG400009902	F-box domain, cyclin-like||Protein of unknown function DUF295
PGSC0003DMG400009904	Armadillo-like helical||Armadillo||U box domain||Armadillo-type fold||Zinc finger, RING/FYVE/PHD-type
PGSC0003DMG400009936	Glycosyl hydrolase family 100||Six-hairpin glycosidase-like
PGSC0003DMG400009941	Leucine-rich repeat||Protein kinase-like domain||Leucine rich repeats (2 copies)||Leucine-rich repeat-containing N-terminal, type 2||Protein kinase, catalytic domain||Serine/threonine-protein kinase, active site||-
PGSC0003DMG400009953	Oxoglutarate/iron-dependent dioxygenase||Prolyl 4-hydroxylase, alpha subunit
PGSC0003DMG400009964	Pseudouridine synthase, catalytic domain
PGSC0003DMG400009967	Neutral/alkaline nonlysosomal ceramidase
PGSC0003DMG400009977	Pentatricopeptide repeat
PGSC0003DMG400009984	Patched||Sterol-sensing domain
PGSC0003DMG400009992	Glyceraldehyde/Erythrose phosphate dehydrogenase family||Glyceraldehyde-3-phosphate dehydrogenase, type I||Glyceraldehyde 3-phosphate dehydrogenase, active site||Glyceraldehyde 3-phosphate dehydrogenase, catalytic domain||NAD(P)-binding domain||Glyceraldehyde 3-phosphate dehydrogenase, NAD(P) binding domain
PGSC0003DMG400010002	Kinetochore protein Nuf2
PGSC0003DMG400010157	Short-chain dehydrogenase/reductase SDR||Glucose/ribitol dehydrogenase||NAD(P)-binding domain
PGSC0003DMG400010161	Twin-arginine translocation protein TatA/E||Twin-arginine translocation protein TatA/B/E
PGSC0003DMG400010180	Tetratricopeptide-like helical||Tetratricopeptide repeat-containing domain||Tetratricopeptide repeat||Thioredoxin-like fold
PGSC0003DMG400010194	Myb domain, plants||Homeodomain-like||SANT/Myb domain||Myb domain
PGSC0003DMG400010236	Cysteine peptidase, histidine active site||Cysteine peptidase, asparagine active site||Proteinase inhibitor I29, cathepsin propeptide||Peptidase C1A, papain C-terminal||Peptidase C1A, papain||Granulin||Cysteine peptidase, cysteine active site
PGSC0003DMG400010257	Peptidase M17||Peptidase M17, leucyl aminopeptidase, C-terminal
PGSC0003DMG400010266	ADF-H/Gelsolin-like domain||Actin-binding, cofilin/tropomyosin type||ADF/Cofilin/Destrin
PGSC0003DMG400010267	Remorin, C-terminal
PGSC0003DMG400010306	2Fe-2S ferredoxin-type domain||Adrenodoxin, iron-sulphur binding site||Beta-grasp domain||Adrenodoxin
PGSC0003DMG400010319	Peptidase S24/S26, beta-ribbon domain||Peptidase S24/S26A/S26B/S26C||Peptidase S26A, signal peptidase I
PGSC0003DMG400010328	FBD||F-box domain, cyclin-like
PGSC0003DMG400010338	Leucyl-tRNA synthetase, class Ia, archaeal/eukaryotic cytosolic||Aminoacyl-tRNA synthetase, class I, conserved site||Aminoacyl-tRNA synthetase, class Ia||Valyl/Leucyl/Isoleucyl-tRNA synthetase, class Ia, editing domain||Peptidyl-prolyl cis-trans isomerase, FKBP-type, domain||Aminoacyl-tRNA synthetase, class 1a, anticodon-binding||Valyl/Leucyl/Isoleucyl-tRNA synthetase, class I, anticodon-binding|…
PGSC0003DMG400010372	Phloem protein 2-like
PGSC0003DMG400010378	Ubiquitin-related domain||Small ubiquitin-related modifier, SUMO||Peptidase C12, ubiquitin carboxyl-terminal hydrolase 1
PGSC0003DMG400010414	Peptide methionine sulfoxide reductase||Peptide methionine sulphoxide reductase MsrA
PGSC0003DMG400010560	NET domain||Bromodomain
PGSC0003DMG400010577	Protein kinase-like domain||Malectin-like carbohydrate-binding domain||Concanavalin A-like lectin/glucanase, subgroup||Serine/threonine- / dual-specificity protein kinase, catalytic domain||Serine/threonine-protein kinase, active site||Protein kinase, catalytic domain||Serine-threonine/tyrosine-protein kinase catalytic domain||Protein kinase, ATP binding site
PGSC0003DMG400010603	Zinc finger, C3HC4 RING-type||Zinc finger, RING/FYVE/PHD-type||P-loop containing nucleoside triphosphate hydrolase||Zinc finger, RING-type, conserved site||SNF2-related
PGSC0003DMG400010609	Zinc finger, LIM-type
PGSC0003DMG400010634	S-adenosyl-L-methionine-dependent methyltransferase-like||Putative S-adenosyl-L-methionine-dependent methyltransferase
PGSC0003DMG400010642	Gene of unknown function
PGSC0003DMG400010646	RNA polymerase, subunit H/Rpb5 C-terminal||DNA-directed RNA polymerase, RPB5 subunit||RNA polymerase, Rpb5, N-terminal
PGSC0003DMG400010660	Superoxide dismutase, copper/zinc, binding site||Superoxide dismutase, copper/zinc binding domain
PGSC0003DMG400010666	Oxoglutarate/iron-dependent dioxygenase||Non-haem dioxygenase N-terminal domain||Isopenicillin N synthase-like
PGSC0003DMG400010691	Protein kinase-like domain||Concanavalin A-like lectin/glucanase, subgroup||Protein kinase, catalytic domain||Serine/threonine-protein kinase, active site
PGSC0003DMG400010698	2Fe-2S ferredoxin-type domain||Adrenodoxin, iron-sulphur binding site||Beta-grasp domain||Adrenodoxin
PGSC0003DMG400010703	Translocation protein Sec62
PGSC0003DMG400010706	Multi antimicrobial extrusion protein
PGSC0003DMG400010715	Haem peroxidase, plant/fungal/bacterial||Peroxidases heam-ligand binding site||Plant peroxidase||Haem peroxidase||Peroxidase, active site
PGSC0003DMG400010740	Membrane insertase OXA1/ALB3/YidC||Membrane insertase YidC/Oxa1, C-terminal
PGSC0003DMG400010772	Actin-like||Actin-related protein 3
PGSC0003DMG400010869	Tetracycline resistance protein, TetA/multidrug resistance protein MdtG||Major facilitator superfamily domain||Major facilitator superfamily||Major facilitator superfamily domain, general substrate transporter
PGSC0003DMG400010893	Target SNARE coiled-coil domain
PGSC0003DMG400010894	Domain of unknown function DUF547||Ternary complex factor MIP1, leucine-zipper
PGSC0003DMG400010901	Pathogenic type III effector avirulence factor Avr cleavage site
PGSC0003DMG400010945	Gene of unknown function
PGSC0003DMG400010947	Protein kinase-like domain||Protein kinase, catalytic domain
PGSC0003DMG400010967	Integrase, catalytic core||Ribonuclease H-like domain
PGSC0003DMG400010987	DNA-binding WRKY
PGSC0003DMG400011022	Zinc finger, PHD-finger||Zinc finger, FYVE/PHD-type||Zinc finger, RING/FYVE/PHD-type||Protein of unknown function DUF3594||Zinc finger, PHD-type||Zinc finger, PHD-type, conserved site
PGSC0003DMG400011044	Enolase||Enolase, conserved site||Enolase, N-terminal||Enolase C-terminal domain-like||Enolase, C-terminal||Enolase N-terminal domain-like
PGSC0003DMG400011046	AP2/ERF domain||DNA-binding, integrase-type
PGSC0003DMG400011050	Protein phosphatase 2C-like||Protein phosphatase 2C, manganese/magnesium aspartate binding site||Protein phosphatase 2C
PGSC0003DMG400011051	Conserved gene of unknown function
PGSC0003DMG400011056	Caskin/Ankyrin repeat-containing protein||Ankyrin repeat||PGG domain||Ankyrin repeat-containing domain
PGSC0003DMG400011059	Zinc finger, PHD-type||Zinc finger, PHD-type, conserved site||Zinc finger, FYVE/PHD-type||Zinc finger, PHD-finger||Acyl-CoA N-acyltransferase||Zinc finger, RING/FYVE/PHD-type
PGSC0003DMG400011069	Thaumatin, pathogenesis-related
PGSC0003DMG400011070	Vacuolar import/degradation protein Vid24
PGSC0003DMG400011101	Gene of unknown function
PGSC0003DMG400011102	DOG1 domain
PGSC0003DMG400011118	F-box domain, cyclin-like||Phloem protein 2-like
PGSC0003DMG400011132	Aldehyde dehydrogenase, conserved site||Aldehyde dehydrogenase, N-terminal||Aldehyde dehydrogenase, C-terminal||Aldehyde dehydrogenase, glutamic acid active site||Aldehyde dehydrogenase domain||Aldehyde/histidinol dehydrogenase
PGSC0003DMG400011135	Fatty acid desaturase, type 1
PGSC0003DMG400011137	Nucleic acid-binding, OB-fold||Translation elongation factor, IF5A C-terminal||Translation elongation factor, IF5A, hypusine site||Translation protein SH3-like||Translation protein SH3-like, subgroup||Translation elongation factor IF5A
PGSC0003DMG400011140	Domain of unknown function DUF250||Drug/metabolite transporter
PGSC0003DMG400011141	Peptidase S10, serine carboxypeptidase||Peptidase S10, serine carboxypeptidase, active site||Alpha/Beta hydrolase fold
PGSC0003DMG400011143	Proteolipid membrane potential modulator
PGSC0003DMG400011144	Proteolipid membrane potential modulator
PGSC0003DMG400011148	Cellulose synthase, RING-type zinc finger||-||Nucleotide-diphospho-sugar transferases||Zinc finger, RING/FYVE/PHD-type||Zinc finger, RING-type||Cellulose synthase
PGSC0003DMG400011150	EF-hand-like domain||Calcium-binding EF-hand||EF-Hand 1, calcium-binding site
PGSC0003DMG400011160	Leucine-rich repeat||Leucine-rich repeat-containing N-terminal, type 2||Protein kinase, catalytic domain||Serine/threonine-protein kinase, active site||Protein kinase, ATP binding site||Protein kinase-like domain||Concanavalin A-like lectin/glucanase, subgroup
PGSC0003DMG400011169	Tetraspanin/Peripherin||Tetraspanin||Tetraspanin, conserved site
PGSC0003DMG400011179	Actin-binding FH2
PGSC0003DMG400011184	Endonuclease/exonuclease/phosphatase
PGSC0003DMG400011200	Protein of unknown function DUF566
PGSC0003DMG400011209	Leucine-rich repeat||Leucine-rich repeat-containing N-terminal, type 2
PGSC0003DMG400011212	WD40 repeat||WD40/YVTN repeat-like-containing domain||WD40-repeat-containing domain
PGSC0003DMG400011225	Ankyrin repeat||Zinc finger, RING-type||Zinc finger, RING-type, conserved site||Ankyrin repeat-containing domain
PGSC0003DMG400011236	Ribonuclease E inhibitor RraA/Dimethylmenaquinone methyltransferase||Regulator of ribonuclease activity A
PGSC0003DMG400011241	Conserved gene of unknown function
PGSC0003DMG400011256	START-like domain||Homeodomain||Homeodomain-like||Lipid-binding START
PGSC0003DMG400011266	Plant methyltransferase dimerisation||O-methyltransferase, family 2||S-adenosyl-L-methionine-dependent methyltransferase-like||Winged helix-turn-helix transcription repressor DNA-binding||O-methyltransferase, caffeic acid-type
PGSC0003DMG400011278	Equilibrative nucleoside transporter
PGSC0003DMG400011282	Tryptophan synthase, beta chain, conserved site||Tryptophan synthase beta chain/beta chain-like||Tryptophan synthase, beta chain||Tryptophan synthase beta subunit-like PLP-dependent enzymes superfamily
PGSC0003DMG400011307	Gene of unknown function
PGSC0003DMG400011312	Multi antimicrobial extrusion protein
PGSC0003DMG400011317	Conserved gene of unknown function
PGSC0003DMG400011324	Synaptobrevin||Longin domain||Longin-like domain
PGSC0003DMG400011330	Chloramphenicol acetyltransferase-like domain||Single hybrid motif||Lipoamide Acyltransferase||Biotin/lipoyl attachment||2-oxoacid dehydrogenase acyltransferase, catalytic domain||E3 binding||2-oxo acid dehydrogenase, lipoyl-binding site
PGSC0003DMG400011352	Tubby, C-terminal||Tubby, C-terminal, conserved site||F-box domain, cyclin-like||Tubby C-terminal-like domain
PGSC0003DMG400011355	Uncharacterised protein family UPF0497, trans-membrane plant subgroup||Uncharacterised protein family UPF0497, trans-membrane plant
PGSC0003DMG400011383	Zinc finger, CCCH-type
PGSC0003DMG400011398	HSP20-like chaperone||CS-like domain
PGSC0003DMG400011405	Zinc finger, RING/FYVE/PHD-type||Zinc finger, FYVE/PHD-type
PGSC0003DMG400011430	DOG1 domain||Basic-leucine zipper domain
PGSC0003DMG400011432	Mitochondrial inner membrane translocase subunit Tim17/Tim22/Tim23/peroxisomal protein PMP24
PGSC0003DMG400011433	Transcription factor, SBP-box
PGSC0003DMG400011446	PC-Esterase||PMR5 N-terminal domain
PGSC0003DMG400011448	Endonuclease/exonuclease/phosphatase
PGSC0003DMG400011476	PITH domain||Thioredoxin||Galactose-binding domain-like
PGSC0003DMG400011499	Pyridoxal phosphate-dependent transferase, major domain||Threonine aldolase||Pyridoxal phosphate-dependent transferase, major region, subdomain 2||Pyridoxal phosphate-dependent transferase, major region, subdomain 1||Aromatic amino acid beta-eliminating lyase/threonine aldolase
PGSC0003DMG400011509	Leucine-rich repeat||Serine-threonine/tyrosine-protein kinase catalytic domain||Protein kinase, catalytic domain||Serine/threonine-protein kinase, active site||Protein kinase, ATP binding site||Concanavalin A-like lectin/glucanase, subgroup||Protein kinase-like domain
PGSC0003DMG400011511	Pentatricopeptide repeat||Tetratricopeptide-like helical
PGSC0003DMG400011530	Glyceraldehyde/Erythrose phosphate dehydrogenase family||Glyceraldehyde-3-phosphate dehydrogenase, type I||Glyceraldehyde 3-phosphate dehydrogenase, active site||Glyceraldehyde 3-phosphate dehydrogenase, catalytic domain||NAD(P)-binding domain||Glyceraldehyde 3-phosphate dehydrogenase, NAD(P) binding domain
PGSC0003DMG400011547	Helix-loop-helix DNA-binding domain containing protein
PGSC0003DMG400011558	Zinc finger, LIM-type
PGSC0003DMG400011597	TGS-like||GTP1/OBG, conserved site||GTP binding domain||TGS||P-loop containing nucleoside triphosphate hydrolase||Small GTP-binding protein domain
PGSC0003DMG400011606	NAD(P)-binding domain
PGSC0003DMG400011613	ABC transporter-like||ABC transporter, conserved site||AAA+ ATPase domain||ABC transporter, transmembrane domain||ABC transporter, transmembrane domain, type 1||P-loop containing nucleoside triphosphate hydrolase
PGSC0003DMG400011649	Rossmann-like alpha/beta/alpha sandwich fold||UspA||Cation/H+ exchanger
PGSC0003DMG400011655	Chalcone isomerase, 3-layer sandwich||Chalcone isomerase
PGSC0003DMG400011659	Zinc finger, LSD1-type||Caspase-like domain||Peptidase C14, caspase catalytic
PGSC0003DMG400011693	Major facilitator superfamily domain, general substrate transporter||Proton-dependent oligopeptide transporter family
PGSC0003DMG400011703	Peptidase M76, ATP23
PGSC0003DMG400011708	Leucine-rich repeat
PGSC0003DMG400011713	Alpha/Beta hydrolase fold
PGSC0003DMG400011730	Conserved gene of unknown function?
PGSC0003DMG400011771	Amino acid transporter, transmembrane
PGSC0003DMG400011775	Terpene synthase, metal-binding domain||Terpene synthase-like||Terpenoid cyclases/protein prenyltransferase alpha-alpha toroid||Terpenoid synthase
PGSC0003DMG400011779	Peptidase aspartic||Peptidase A1||Peptidase aspartic, active site
PGSC0003DMG400011781	Mitochondrial ATP synthase 6kDa subunit
PGSC0003DMG400011786	RNA-binding, CRM domain
PGSC0003DMG400011787	Calcium/proton exchanger||Calcium/proton exchanger superfamily||Sodium/calcium exchanger membrane region
PGSC0003DMG400011788	Gene of unknown function
PGSC0003DMG400011791	Protein of unknown function DUF647||-
PGSC0003DMG400011793	Protein kinase, catalytic domain||Serine/threonine-protein kinase, active site||Protein kinase, ATP binding site||Protein kinase-like domain||Concanavalin A-like lectin/glucanase, subgroup||Wall-associated receptor kinase galacturonan-binding domain
PGSC0003DMG400011814	Gene of unknown function
PGSC0003DMG400011846	Rhodanese-like domain
PGSC0003DMG400011874	GDP-fucose protein O-fucosyltransferase||O-fucosyltransferase, plant
PGSC0003DMG400011910	Pirin, N-terminal domain||Pirin||Pirin, C-terminal domain||RmlC-like jelly roll fold||RmlC-like cupin domain
PGSC0003DMG400011914	K Homology domain, type 1||K Homology domain
PGSC0003DMG400011944	Basic-leucine zipper domain
PGSC0003DMG400011993	Phloem protein 2-like||F-box domain, cyclin-like
PGSC0003DMG400012028	Periaxin
PGSC0003DMG400012038	DNA-binding, integrase-type||AP2/ERF domain
PGSC0003DMG400012041	Zinc finger, DHHC-type, palmitoyltransferase
PGSC0003DMG400012044	Glycoside hydrolase, family 10||Glycoside hydrolase, superfamily||Glycoside hydrolase, catalytic domain
PGSC0003DMG400012073	Camphor resistance CrcB protein
PGSC0003DMG400012115	Domain of unknown function DUF4005||IQ motif, EF-hand binding site||P-loop containing nucleoside triphosphate hydrolase
PGSC0003DMG400012130	Gene of unknown function
PGSC0003DMG400012131	Tetratricopeptide-like helical||Tetratricopeptide repeat-containing domain||Tetratricopeptide repeat
PGSC0003DMG400012134	Domain of unknown function DUF2439
PGSC0003DMG400012137	Zinc finger, RING-type||Zinc finger, RING/FYVE/PHD-type
PGSC0003DMG400012167	ABC transporter-like||ABC transporter, transmembrane domain||AAA+ ATPase domain||ABC transporter, conserved site||ABC transporter, transmembrane domain, type 1||P-loop containing nucleoside triphosphate hydrolase
PGSC0003DMG400012194	Coatomer/clathrin adaptor appendage, Ig-like subdomain||Armadillo-type fold||Clathrin adaptor, alpha/beta/gamma-adaptin, appendage, Ig-like subdomain||Armadillo-like helical||Beta-adaptin appendage, C-terminal subdomain||Adaptor protein complex, beta subunit||Clathrin/coatomer adaptor, adaptin-like, N-terminal||Coatomer/calthrin adaptor appendage, C-terminal subdomain||Clathrin adaptor, beta-adap…
PGSC0003DMG400012200	Conserved gene of unknown function
PGSC0003DMG400012201	BTB/POZ fold||Quinoprotein amine dehydrogenase, beta chain-like||BTB/POZ-like||WD40/YVTN repeat-like-containing domain||Potassium channel tetramerisation-type BTB domain
PGSC0003DMG400012204	Protein of unknown function DUF3741||Domain of unknown function DUF4378
PGSC0003DMG400012210	Glutamate--cysteine ligase, GCS2||Glutamate--cysteine ligase, plant
PGSC0003DMG400012258	-||ABI family
PGSC0003DMG400012297	Amino acid transporter, transmembrane
PGSC0003DMG400012300	UBX||Thioredoxin-like fold||Ubiquitin-related domain||UBA-like||UAS
PGSC0003DMG400012307	Protein kinase-like domain||Protein kinase, ATP binding site||Leucine-rich repeat-containing N-terminal, type 2||Protein kinase, catalytic domain||Leucine-rich repeat
PGSC0003DMG400012312	BTB/POZ||BTB/Kelch-associated||BTB/POZ fold||BTB/POZ-like
PGSC0003DMG400012332	Helicase, C-terminal||Helicase/UvrB domain||Xeroderma pigmentosum group B protein (XP-B)||P-loop containing nucleoside triphosphate hydrolase||Helicase, superfamily 1/2, ATP-binding domain
PGSC0003DMG400012403	No apical meristem (NAM) protein
PGSC0003DMG400012412	HAD-like domain||HAD-superfamily hydrolase, subfamily IA, variant 1||Class II aldolase/adducin N-terminal||Probable bifunctional methylthioribulose-1-phosphate dehydratase/enolase-phosphatase E1||Methylthioribulose-1-phosphate dehydratase, eukaryotes||Methylthioribulose-1-phosphate dehydratase||Enolase-phosphatase E1
PGSC0003DMG400012422	Pentatricopeptide repeat||Tetratricopeptide-like helical
PGSC0003DMG400012431	Protein kinase C-like, phorbol ester/diacylglycerol binding||Zinc finger, PHD-type||Zinc finger, RING/FYVE/PHD-type||Acyl-CoA N-acyltransferase||Zinc finger, PHD-finger||Zinc finger, FYVE/PHD-type
PGSC0003DMG400012436	Basic-leucine zipper domain
PGSC0003DMG400012445	Proton pump-interactor
PGSC0003DMG400012484	Cornichon
PGSC0003DMG400012494	PGR5 1A, chloroplastic
PGSC0003DMG400012503	DNA mismatch repair protein MutS, core||DNA mismatch repair protein MutS, clamp||P-loop containing nucleoside triphosphate hydrolase||DNA mismatch repair protein MutS, C-terminal
PGSC0003DMG400012508	Pectinesterase inhibitor
PGSC0003DMG400012513	ACT domain
PGSC0003DMG400012519	Conserved gene of unknown function
PGSC0003DMG400012523	Major facilitator superfamily domain, general substrate transporter||Major facilitator superfamily||SPX, N-terminal
PGSC0003DMG400012555	Domain of unknown function DUF1084
PGSC0003DMG400012557	Ubiquitin carboxyl-terminal hydrolase-like domain||Peptidase C19, ubiquitin carboxyl-terminal hydrolase 2||Peptidase C19, ubiquitin carboxyl-terminal hydrolase 2, conserved site
PGSC0003DMG400012562	Conserved gene of unknown function
PGSC0003DMG400012585	K+ potassium transporter
PGSC0003DMG400012586	Conserved gene of unknown function
PGSC0003DMG400012601	Nucleotide-binding, alpha-beta plait||RNA recognition motif domain
PGSC0003DMG400012604	Thioredoxin-like fold||Sucraseferredoxin-like
PGSC0003DMG400012681	Peptidase M24B, X-Pro dipeptidase/aminopeptidase P, conserved site||Creatinase||Peptidase M24, structural domain||Creatinase/Aminopeptidase P, N-terminal||Creatinase/Aminopeptidase P/Spt16, N-terminal
PGSC0003DMG400012696	ATPase, P-type cation-transporter, N-terminal||ATPase, P-type, ATPase-associated domain||Calcium-transporting ATPase, N-terminal autoinhibitory domain||HAD-like domain||ATPase, P-type, cytoplasmic domain N||ATPase, P-type cation-transporter, C-terminal||ATPase, P-type, K/Mg/Cd/Cu/Zn/Na/Ca/Na/H-transporter||ATPase, P-type, transmembrane domain||ATPase, P-type, calcium-transporting, PMCA-type||ATPa…
PGSC0003DMG400012709	Nucleoporin interacting component Nup93/Nic96
PGSC0003DMG400012711	Conserved gene of unknown function
PGSC0003DMG400012760	Domain of unknown function DUF296||AT hook, DNA-binding motif
PGSC0003DMG400012785	Conserved gene of unknown function
PGSC0003DMG400012790	Terpene synthase-like||Terpene synthase, metal-binding domain||Terpenoid synthase||Terpenoid cyclases/protein prenyltransferase alpha-alpha toroid
PGSC0003DMG400012793	Cytochrome P450, E-class, group I||Cytochrome P450
PGSC0003DMG400012800	Pyridoxal phosphate-dependent transferase, major domain||Pyridoxal phosphate-dependent transferase, major region, subdomain 2||Pyridoxal phosphate-dependent transferase, major region, subdomain 1||Aminotransferase class-III
PGSC0003DMG400012806	Conserved gene of unknown function
PGSC0003DMG400012815	LisH dimerisation motif||LisH dimerisation motif, subgroup
PGSC0003DMG400012816	Malectin-like carbohydrate-binding domain||Leucine-rich repeat
PGSC0003DMG400012819	Conserved gene of unknown function
PGSC0003DMG400012822	Domain of unknown function DUF3700||Nucleophile aminohydrolases, N-terminal
PGSC0003DMG400012836	Conserved gene of unknown function
PGSC0003DMG400012838	Bifunctional inhibitor/plant lipid transfer protein/seed storage helical domain||Plant lipid transfer protein/Par allergen
PGSC0003DMG400012846	Tubulin/FtsZ, C-terminal||Tubulin, conserved site||Cell division protein FtsZ, C-terminal||Tubulin/FtsZ, 2-layer sandwich domain||Tubulin/FtsZ, GTPase domain||Cell division protein FtsZ, conserved site||Cell division protein FtsZ
PGSC0003DMG400012851	Neuraminidase
PGSC0003DMG400012882	Protein of unknown function DUF3049
PGSC0003DMG400012887	Cyclin P/U||Cyclin PHO80-like||Cyclin-like
PGSC0003DMG400012890	Small GTPase superfamily, mitochondrial rho type||MIRO||EF hand associated, type-2||EF hand associated, type-1||P-loop containing nucleoside triphosphate hydrolase||Mitochondrial Rho-like||EF-hand-like domain||Calcium-binding EF-hand||-||Small GTPase superfamily
PGSC0003DMG400012892	Cleavage stimulation factor subunit 2, hinge domain||Transcription termination and cleavage factor C-terminal domain
PGSC0003DMG400012934	Pectin lyase fold||Glycoside hydrolase, family 28||Parallel beta-helix repeat||Pectin lyase fold/virulence factor
PGSC0003DMG400012948	Late blight resistance protein
PGSC0003DMG400012955	Protein kinase-like domain||Leucine-rich repeat-containing N-terminal, type 2||Serine/threonine-protein kinase, active site||Protein kinase, catalytic domain||Leucine-rich repeat
PGSC0003DMG400012962	Basic-leucine zipper domain||-||DOG1 domain
PGSC0003DMG400012987	Threonine dehydratase, biosynthetic||Tryptophan synthase beta subunit-like PLP-dependent enzymes superfamily||Serine/threonine dehydratase, pyridoxal-phosphate-binding site||Threonine dehydratase, C-terminal regulatory domain
PGSC0003DMG400013040	NAD(P)-binding domain||Short-chain dehydrogenase/reductase SDR
PGSC0003DMG400013061	Conserved gene of unknown function
PGSC0003DMG400013064	Gene of unknown function
PGSC0003DMG400013073	P-loop containing nucleoside triphosphate hydrolase
PGSC0003DMG400013088	Six-hairpin glycosidase-like||Glycosyl hydrolase family 100
PGSC0003DMG400013114	P-loop containing nucleoside triphosphate hydrolase||ABC transporter-like
PGSC0003DMG400013135	Glycoside hydrolase, superfamily||Glycoside hydrolase family 3 C-terminal domain||Glycoside hydrolase family 3||Glycoside hydrolase, family 3, N-terminal
PGSC0003DMG400013146	Glycoside hydrolase, superfamily||Glycoside hydrolase, catalytic domain||Glycoside hydrolase, family 5
PGSC0003DMG400013147	Protein kinase, catalytic domain||Serine/threonine-protein kinase, active site||Protein kinase-like domain||Serine/threonine- / dual-specificity protein kinase, catalytic domain||Protein kinase, ATP binding site
PGSC0003DMG400013186	Peptidase C19, ubiquitin carboxyl-terminal hydrolase 2, conserved site||Ubiquitin carboxyl-terminal hydrolase-like domain||Peptidase C19, ubiquitin carboxyl-terminal hydrolase 2
PGSC0003DMG400013212	RecF/RecN/SMC||P-loop containing nucleoside triphosphate hydrolase
PGSC0003DMG400013218	Glycosyl transferase, family 48||Callose synthase
PGSC0003DMG400013235	Glutamine synthetase, beta-Grasp||Glutamine synthetase/guanido kinase, catalytic domain||Glutamine synthetase, N-terminal conserved site||Glutamine synthetase, glycine-rich site||Glutamine synthetase, catalytic domain
PGSC0003DMG400013241	Helicase, superfamily 1/2, ATP-binding domain||P-loop containing nucleoside triphosphate hydrolase||Mitochondrial degradasome RNA helicase subunit, C-terminal domain||Helicase, C-terminal
PGSC0003DMG400013243	Cyclic nucleotide-binding-like||Cyclic nucleotide-binding domain||RmlC-like jelly roll fold||Ankyrin repeat||Ankyrin repeat-containing domain||Potassium channel, voltage-dependent, EAG/ELK/ERG||Potassium channel, plant-type||Ion transport domain
PGSC0003DMG400013248	Lipoxygenase, conserved site||Lipase/lipooxygenase, PLAT/LH2||Lipoxygenase, C-terminal||Lipoxygenase, iron binding site||Lipoxygenase, LH2||Lipoxygenase||Lipoxygenase, plant
PGSC0003DMG400013258	Conserved gene of unknown function
PGSC0003DMG400013275	Glycoside hydrolase, family 5||Glycoside hydrolase, catalytic domain||Glycoside hydrolase, superfamily
PGSC0003DMG400013285	Inositol monophosphatase, metal-binding site||Inositol monophosphatase, conserved site||Inositol monophosphatase||Inositol monophosphatase, Lithium-sensitive
PGSC0003DMG400013286	Armadillo||Armadillo-like helical||Armadillo-type fold
PGSC0003DMG400013288	Pentatricopeptide repeat||P-loop containing nucleoside triphosphate hydrolase||Thymidine kinase, conserved site||Thymidine kinase
PGSC0003DMG400013296	Heavy metal-associated domain, HMA
PGSC0003DMG400013308	P-loop containing nucleoside triphosphate hydrolase||NB-ARC
PGSC0003DMG400013329	Zinc finger, C2H2-like||Zinc finger, C2H2
PGSC0003DMG400013331	Pyridoxal phosphate-dependent decarboxylase||Glutamate decarboxylase||Pyridoxal phosphate-dependent transferase, major region, subdomain 1||Pyridoxal phosphate-dependent transferase, major domain
PGSC0003DMG400013344	Winged helix-turn-helix transcription repressor DNA-binding||Transcription Factor IIF, Rap30/Rap74, interaction||Transcription initiation factor IIF, alpha subunit
PGSC0003DMG400013346	DNA-directed RNA polymerase Rpb11, 13-16kDa subunit, conserved site||DNA-directed RNA polymerase, RBP11-like
PGSC0003DMG400013355	Conserved gene of unknown function
PGSC0003DMG400013366	CRAL-TRIO domain||CRAL/TRIO, N-terminal domain
PGSC0003DMG400013391	Armadillo-type fold||Armadillo-like helical||Armadillo
PGSC0003DMG400013398	Cellulose synthase||Nucleotide-diphospho-sugar transferases
PGSC0003DMG400013399	HR-like lesion-inducer
PGSC0003DMG400013408	Gnk2-homologous domain
PGSC0003DMG400013420	ABC transporter, transmembrane domain||AAA+ ATPase domain||ABC transporter, conserved site||ABC transporter-like||P-loop containing nucleoside triphosphate hydrolase||ABC transporter, transmembrane domain, type 1
PGSC0003DMG400013434	Plant lipid transfer protein/Par allergen||Bifunctional inhibitor/plant lipid transfer protein/seed storage helical domain
PGSC0003DMG400013439	Peptidase aspartic, active site||Saposin B||Saposin-like type B, 2||Peptidase A1||Saposin-like||Peptidase aspartic||Saposin-like type B, 1
PGSC0003DMG400013444	Peptidase S9, serine active site||WD40/YVTN repeat-like-containing domain||Peptidase S9, prolyl oligopeptidase, catalytic domain||WD40-like Beta Propeller||Alpha/Beta hydrolase fold
PGSC0003DMG400013455	Mammalian uncoordinated homology 13, domain 2||Munc13 homology 1||ATPase-like, ATP-binding domain||Protein of unknown function DUF810
PGSC0003DMG400013458	Tetratricopeptide repeat-containing domain||Tetratricopeptide-like helical
PGSC0003DMG400013462	NIF system FeS cluster assembly, NifU, N-terminal
PGSC0003DMG400013473	Helix-loop-helix domain
PGSC0003DMG400013493	Homeodomain-like||Homeobox, conserved site||ELK||Homeobox KN domain||KNOX2||KNOX1||Homeodomain
PGSC0003DMG400013511	Type II pantothenate kinase
PGSC0003DMG400013543	NB-ARC||P-loop containing nucleoside triphosphate hydrolase||Toll/interleukin-1 receptor homology (TIR) domain
PGSC0003DMG400013544	Squalene cyclase||Terpene synthase, conserved site||Terpenoid cyclases/protein prenyltransferase alpha-alpha toroid||Prenyltransferase/squalene oxidase
PGSC0003DMG400013577	Dimethylaniline monooxygenase, N-oxide-forming||Flavin monooxygenase-like
PGSC0003DMG400013578	Pentatricopeptide repeat
PGSC0003DMG400013579	Beta-ketoacyl synthase, C-terminal||Beta-ketoacyl synthase, N-terminal||Thiolase-like, subgroup||Thiolase-like||Beta-ketoacyl synthase, active site||3-oxoacyl-[acyl-carrier-protein] synthase 2
PGSC0003DMG400013587	DNA-binding, integrase-type||AP2/ERF domain
PGSC0003DMG400013634	Glutamine amidotransferase type 1||P-loop containing nucleoside triphosphate hydrolase||CTP synthase, N-terminal||Class I glutamine amidotransferase-like||CTP synthase
PGSC0003DMG400013638	Pyridine nucleotide-disulphide oxidoreductase, class-II, active site||Pyridine nucleotide-disulphide oxidoreductase, class-II||Pyridine nucleotide-disulphide oxidoreductase, NAD-binding domain||Pyridine nucleotide-disulphide oxidoreductase, FAD/NAD(P)-binding domain||Thioredoxin reductase||FAD-dependent pyridine nucleotide-disulphide oxidoreductase
PGSC0003DMG400013655	Zinc finger, RING-type, conserved site||Zinc finger, RING-type||Zinc finger, RING/FYVE/PHD-type||Zinc finger, CCCH-type
PGSC0003DMG400013699	Methyl-CpG DNA binding||Zinc finger, CW-type||DNA-binding, integrase-type
PGSC0003DMG400013700	Gene of unknown function
PGSC0003DMG400013720	Mlo-related protein
PGSC0003DMG400013729	Src homology-3 domain||BAR domain||Arfaptin homology (AH) domain/BAR domain
PGSC0003DMG400013735	Gene of unknown function
PGSC0003DMG400013736	NB-ARC||Leucine-rich repeat||P-loop containing nucleoside triphosphate hydrolase
PGSC0003DMG400013743	TPX2 central domain||Xklp2 targeting protein||TPX2, C-terminal domain
PGSC0003DMG400013890	Ubiquitin-related domain||PUG domain||WLM||PUB domain
PGSC0003DMG400013895	Rab-GTPase-TBC domain
PGSC0003DMG400013903	B-cell receptor-associated 31-like
PGSC0003DMG400013912	Retrotransposon gag protein
PGSC0003DMG400013947	C2 calcium-dependent membrane targeting
PGSC0003DMG400013949	Heat shock protein DnaJ, N-terminal||Armadillo-type fold||-||Armadillo-like helical||Domain of unknown function DUF4339||Armadillo
PGSC0003DMG400013962	Amino acid transporter, transmembrane
PGSC0003DMG400013974	Protein of unknown function DUF1218
PGSC0003DMG400014128	HAD-like domain||ATPase, P-type, cytoplasmic domain N||ATPase, P-type, ATPase-associated domain||ATPase, P-type, K/Mg/Cd/Cu/Zn/Na/Ca/Na/H-transporter||ATPase, P-type, transmembrane domain||ATPase, P-type phosphorylation site||ATPase, P-type, plasma-membrane proton-efflux
PGSC0003DMG400014131	Leucine-rich repeat family protein
PGSC0003DMG400014134	Conserved gene of unknown function
PGSC0003DMG400014140	Cobalamin (vitamin B12) biosynthesis CobW-like, C-terminal||P-loop containing nucleoside triphosphate hydrolase||CobW/HypB/UreG domain
PGSC0003DMG400014179	DNA-binding pseudobarrel domain||Auxin response factor||AUX/IAA protein||B3 DNA binding domain||Aux/IAA-ARF-dimerisation
PGSC0003DMG400014185	Zinc-finger domain of monoamine-oxidase A repressor R1
PGSC0003DMG400014220	Conserved gene of unknown function
PGSC0003DMG400014250	Peptidase S10, serine carboxypeptidase||Peptidase S10, serine carboxypeptidase, active site||Alpha/Beta hydrolase fold
PGSC0003DMG400014266	Arginine/serine-rich-splicing factor RSP40/RSP41||RNA recognition motif domain||Nucleotide-binding, alpha-beta plait
PGSC0003DMG400014340	Cytochrome b561/ferric reductase transmembrane||Cytochrome b561, eukaryote
PGSC0003DMG400014369	RmlC-like cupin domain||Polyprenyl synthetase||Ureidoglycolate hydrolase||Terpenoid synthase||Ureidoglycolate hydrolase domain
PGSC0003DMG400014370	EF-hand-like domain||Calcium-binding EF-hand
PGSC0003DMG400014383	Acid phosphatase/vanadium-dependent haloperoxidase-related
PGSC0003DMG400014390	Uncharacterised protein family UPF0136, Transmembrane
PGSC0003DMG400014393	Conserved gene of unknown function
PGSC0003DMG400014394	Ankyrin repeat-containing domain
PGSC0003DMG400014402	PsbQ-like domain||-||Photosystem II PsbQ, oxygen evolving complex
PGSC0003DMG400014411	Ion transport 2||Two pore domain potassium channel
PGSC0003DMG400014412	Domain of unknown function DUF4283
PGSC0003DMG400014413	Armadillo-type fold||TATA box binding protein associated factor (TAF)||Domain of unknown function DUF1546||Armadillo-like helical||Histone-fold
PGSC0003DMG400014414	Calcium-binding EF-hand||EF-hand-like domain||P-loop containing nucleoside triphosphate hydrolase||EPS15 homology (EH)||Dynamin, GTPase domain
PGSC0003DMG400014425	Gag-pol polyprotein
PGSC0003DMG400014443	Frigida-like
PGSC0003DMG400014463	Leucine-rich repeat
PGSC0003DMG400014467	Inositol polyphosphate kinase
PGSC0003DMG400014472	Exostosin-like
PGSC0003DMG400014497	Beta-adaptin appendage, C-terminal subdomain||Armadillo-type fold||Adaptor protein complex, beta subunit||Clathrin/coatomer adaptor, adaptin-like, N-terminal||Beta2-adaptin/TBP, C-terminal domain||Armadillo-like helical||AP complex subunit beta
PGSC0003DMG400014503	Target SNARE coiled-coil domain||t-SNARE||Syntaxin, N-terminal
PGSC0003DMG400014512	GTP binding domain||GTP-binding protein, ribosome biogenesis, YsxC||P-loop containing nucleoside triphosphate hydrolase
PGSC0003DMG400014539	Proton-dependent oligopeptide transporter family||Major facilitator superfamily domain, general substrate transporter||Major facilitator superfamily domain
PGSC0003DMG400014549	Thiolase-like||Very-long-chain 3-ketoacyl-CoA synthase||Thiolase-like, subgroup||3-Oxoacyl-[acyl-carrier-protein (ACP)] synthase III C-terminal||FAE1/Type III polyketide synthase-like protein
PGSC0003DMG400014556	Glycosyl transferase, family 14
PGSC0003DMG400014565	Zinc finger, CCCH-type
PGSC0003DMG400014571	Protein of unknown function DUF639
PGSC0003DMG400014576	Leucine-rich repeat||Protein kinase, ATP binding site||Leucine rich repeats (2 copies)||Protein kinase-like domain||Concanavalin A-like lectin/glucanase, subgroup||Leucine-rich repeat-containing N-terminal, type 2||Protein kinase, catalytic domain
PGSC0003DMG400014580	Conserved gene of unknown function
PGSC0003DMG400014586	Conserved gene of unknown function
PGSC0003DMG400014587	Zinc knuckle CX2CX4HX4C
PGSC0003DMG400014592	Glutamine synthetase, glycine-rich site||Glutamine synthetase, N-terminal conserved site||Glutamine synthetase, catalytic domain||Glutamine synthetase, beta-Grasp||Glutamine synthetase/guanido kinase, catalytic domain
PGSC0003DMG400014595	Cyclin-like||Cyclin, C-terminal||Cyclin, N-terminal
PGSC0003DMG400014598	Ribonuclease III domain||DNA-binding, integrase-type||Double-stranded RNA-binding-like||AP2/ERF domain
PGSC0003DMG400014644	Gene of unknown function
PGSC0003DMG400014661	Conserved gene of unknown function
PGSC0003DMG400014704	Conserved gene of unknown function
PGSC0003DMG400014708	Cullin repeat-like-containing domain||Cullin, N-terminal
PGSC0003DMG400014709	IQ motif, EF-hand binding site||P-loop containing nucleoside triphosphate hydrolase||Dil domain||Myosin head, motor domain||Dilute
PGSC0003DMG400014722	Sterol reductase, conserved site||Ergosterol biosynthesis ERG4/ERG24
PGSC0003DMG400014823	Concanavalin A-like lectin/glucanase, subgroup||Glycoside hydrolase, family 16||Concanavalin A-like lectin/glucanases superfamily||Xyloglucan endotransglucosylase/hydrolase||Beta-glucanase||Glycoside hydrolase, family 16, active site||Xyloglucan endo-transglycosylase, C-terminal
PGSC0003DMG400014838	Pentatricopeptide repeat
PGSC0003DMG400014859	Protein Transporter, Pam16
PGSC0003DMG400014871	Alcohol dehydrogenase, C-terminal||NAD(P)-binding domain||Alcohol dehydrogenase GroES-like||GroES-like||Alcohol dehydrogenase superfamily, zinc-type
PGSC0003DMG400014877	BTB/POZ||BTB/POZ fold||NPH3 domain||BTB/POZ-like
PGSC0003DMG400014954	Cytochrome P450, conserved site||Cytochrome P450||Cytochrome P450, E-class, group I
PGSC0003DMG400014992	SNF2-related||Helicase, C-terminal||Helicase, superfamily 1/2, ATP-binding domain||P-loop containing nucleoside triphosphate hydrolase
PGSC0003DMG400015004	Myosin II heavy chain-like
PGSC0003DMG400015007	C2 calcium-dependent membrane targeting
PGSC0003DMG400015073	Interferon-induced guanylate-binding protein
PGSC0003DMG400015106	Haem peroxidase, plant/fungal/bacterial||Peroxidases heam-ligand binding site||Peroxidase, active site||Plant peroxidase||Haem peroxidase
PGSC0003DMG400015111	Alpha/Beta hydrolase fold||Pectinacetylesterase
PGSC0003DMG400015119	NAD(P)-binding domain
PGSC0003DMG400015127	Histidine triad, conserved site||HIT-like domain||Histidine triad (HIT) protein
PGSC0003DMG400015180	Tubulin/FtsZ, 2-layer sandwich domain||Tubulin, C-terminal||Tubulin/FtsZ, GTPase domain||Tubulin||Tubulin/FtsZ, C-terminal||Gamma tubulin||Tubulin, conserved site
PGSC0003DMG400015191	Protein of unknown function DUF3537
PGSC0003DMG400015199	Conserved gene of unknown function
PGSC0003DMG400015233	Glycosyl transferase, family 48
PGSC0003DMG400015238	Kelch-type beta propeller||Domain of unknown function DUF4110
PGSC0003DMG400015243	DNA-binding SAP||Ubiquitin ligase, Det1/DDB1-complexing
PGSC0003DMG400015248	Immediate early protein homolog
PGSC0003DMG400015298	NADH:ubiquinone/plastoquinone oxidoreductase
PGSC0003DMG400015319	WD40 repeat, conserved site||WD40 repeat||G-protein beta WD-40 repeat||WD40-repeat-containing domain||Protein kinase, catalytic domain||WD40/YVTN repeat-like-containing domain||Protein kinase-like domain
PGSC0003DMG400015321	Photosystem II S4||RNA-binding S4 domain
PGSC0003DMG400015327	UDP-glucuronosyl/UDP-glucosyltransferase
PGSC0003DMG400015356	Short-chain dehydrogenase/reductase SDR||Glucose/ribitol dehydrogenase||NAD(P)-binding domain||Light-dependent protochlorophyllide reductase
PGSC0003DMG400015359	Zinc finger, RING-type||Zinc finger, RING/FYVE/PHD-type||Zinc finger, RING-type, conserved site
PGSC0003DMG400015364	Plastocyanin-like||Cupredoxin
PGSC0003DMG400015373	Exonuclease||Ribonuclease H-like domain||Exonuclease, RNase T/DNA polymerase III
PGSC0003DMG400015380	P-loop containing nucleoside triphosphate hydrolase||-||tRNA isopentenyltransferase||tRNA delta(2)-isopentenylpyrophosphate transferase
PGSC0003DMG400015385	Phosphoenolpyruvate carboxylase, bacterial/plant-type||Phosphoenolpyruvate carboxylase, active site||Pyruvate/Phosphoenolpyruvate kinase||Phosphoenolpyruvate carboxylase
PGSC0003DMG400015420	P-loop containing nucleoside triphosphate hydrolase
PGSC0003DMG400015424	BZR1, transcriptional repressor
PGSC0003DMG400015440	RNA cap guanine-N2 methyltransferase||S-adenosyl-L-methionine-dependent methyltransferase-like||WW/Rsp5/WWP
PGSC0003DMG400015441	Protein of unknown function DUF827, plant
PGSC0003DMG400015448	Serine/threonine- / dual-specificity protein kinase, catalytic domain||Protein kinase, ATP binding site||Protein kinase-like domain||Protein kinase, catalytic domain
PGSC0003DMG400015450	Protein of unknown function DUF2053, membrane
PGSC0003DMG400015457	Target SNARE coiled-coil domain||Syntaxin 6, N-terminal||t-SNARE
PGSC0003DMG400015480	Endonuclease/exonuclease/phosphatase||Zinc knuckle CX2CX4HX4C
PGSC0003DMG400015491	Uncharacterised protein family UPF0261||Pyruvate/Phosphoenolpyruvate kinase||Aldolase-type TIM barrel||TIM-barrel signal transduction protein, predicted
PGSC0003DMG400015529	Thioredoxin-like fold||NADH dehydrogenase [ubiquinone] (complex I), alpha subcomplex, subunit 2||Ribosomal protein/NADH dehydrogenase domain
PGSC0003DMG400015540	Tetratricopeptide-like helical||Pentatricopeptide repeat
PGSC0003DMG400015561	Protein of unknown function DUF1635
PGSC0003DMG400015576	Ribonuclease H1, N-terminal||Ribonuclease H domain||Ribosomal protein L9/RNase H1, N-terminal||Ribonuclease H-like domain
PGSC0003DMG400015599	Conserved gene of unknown function
PGSC0003DMG400015607	Peptidase M20, dimerisation||Peptidase M20||Amidohydrolase
PGSC0003DMG400015618	Conserved gene of unknown function
PGSC0003DMG400015683	Lipase, GDSL||Esterase, SGNH hydrolase-type, subgroup
PGSC0003DMG400015728	Glucose/Sorbosone dehydrogenase||Soluble quinoprotein glucose/sorbosone dehydrogenase||Six-bladed beta-propeller, TolB-like
PGSC0003DMG400015733	5-AMP-activated protein kinase, beta subunit, interaction domain
PGSC0003DMG400015747	DNA binding protein
PGSC0003DMG400015754	RNA recognition motif domain||Nucleotide-binding, alpha-beta plait
PGSC0003DMG400015755	Heat shock protein DnaJ, N-terminal||Heat shock protein DnaJ, conserved site
PGSC0003DMG400015771	Protein of unknown function DUF724||B3 DNA binding domain||DNA-binding pseudobarrel domain
PGSC0003DMG400015820	DNA-binding pseudobarrel domain
PGSC0003DMG400015823	Protein of unknown function DUF599
PGSC0003DMG400015824	Leucine-rich repeat-containing N-terminal, type 2||Leucine-rich repeat
PGSC0003DMG400015830	Conserved gene of unknown function
PGSC0003DMG400015845	ACT domain
PGSC0003DMG400015860	Molybdenum cofactor sulfurase, C-terminal||Pyruvate kinase-like, insert domain||MOSC, N-terminal beta barrel
PGSC0003DMG400015872	P-loop containing nucleoside triphosphate hydrolase||NB-ARC
PGSC0003DMG400015930	Gene of unknown function
PGSC0003DMG400015962	BSD
PGSC0003DMG400015968	Translation elongation factor EF1B/ribosomal protein S6||Ribosomal protein S6||Ribosomal protein S6, plastid/chloroplast
PGSC0003DMG400016002	Small GTPase superfamily, Rab type||P-loop containing nucleoside triphosphate hydrolase||Small GTP-binding protein domain||Small GTPase superfamily
PGSC0003DMG400016009	S-adenosylmethionine decarboxylase, core||S-adenosylmethionine decarboxylase, conserved site||S-adenosylmethionine decarboxylase subgroup||S-adenosylmethionine decarboxylase
PGSC0003DMG400016012	Concanavalin A-like lectin/glucanase, subgroup||Protein kinase-like domain||Protein kinase, ATP binding site||Protein kinase, catalytic domain||Serine/threonine-protein kinase, active site
PGSC0003DMG400016016	Chorismate synthase||Chorismate synthase, conserved site
PGSC0003DMG400016068	Bet v I domain||Major latex protein domain||START-like domain
PGSC0003DMG400016115	NAD(P)-binding domain||Alcohol dehydrogenase, C-terminal||Alcohol dehydrogenase GroES-like||Alcohol dehydrogenase, zinc-type, conserved site||GroES-like||Alcohol dehydrogenase superfamily, zinc-type
PGSC0003DMG400016138	Type I phosphodiesterase/nucleotide pyrophosphatase/phosphate transferase||Alkaline-phosphatase-like, core domain||Alkaline phosphatase-like, alpha/beta/alpha
PGSC0003DMG400016177	Fatty acid desaturase, type 2||Ferritin/ribonucleotide reductase-like||Ribonucleotide reductase-related
PGSC0003DMG400016181	HAD-superfamily hydrolase, subfamily IIA||2-phosphoglycolate phosphatase, eukaryotic||Nitrophenylphosphatase-like domain||HAD-like domain
PGSC0003DMG400016189	K Homology domain, type 1||K Homology domain
PGSC0003DMG400016198	Xanthine/uracil/vitamin C permease
PGSC0003DMG400016203	Transcription factor, MADS-box||Transcription factor, K-box
PGSC0003DMG400016207	Domain of unknown function DUF4308
PGSC0003DMG400016208	Pyrophosphate-dependent phosphofructokinase TP0108||Phosphofructokinase||Phosphofructokinase domain
PGSC0003DMG400016216	Fascin domain||Actin cross-linking||Fascin||Glycoside hydrolase, superfamily||Glycoside hydrolase, catalytic domain||Glycoside hydrolase, family 5||Glycoside hydrolase, family 5, conserved site
PGSC0003DMG400016219	3,4-dihydroxy-2-butanone 4-phosphate synthase, RibB||DHBP synthase RibB-like alpha/beta domain||GTP cyclohydrolase II, RibA||Riboflavin biosynthesis protein RibBA
PGSC0003DMG400016228	Ribosomal protein L37
PGSC0003DMG400016232	Gene of unknown function
PGSC0003DMG400016234	Tetratricopeptide-like helical||Pentatricopeptide repeat
PGSC0003DMG400016242	Acetolactate synthase, small subunit||ACT domain||Acetolactate synthase, small subunit, C-terminal
PGSC0003DMG400016248	Chromatin assembly factor 1 subunit A
PGSC0003DMG400016275	Thiolase-like||Very-long-chain 3-ketoacyl-CoA synthase||Thiolase-like, subgroup||3-Oxoacyl-[acyl-carrier-protein (ACP)] synthase III C-terminal||FAE1/Type III polyketide synthase-like protein
PGSC0003DMG400016292	Homeodomain-like||Myb domain||SANT/Myb domain
PGSC0003DMG400016293	NADP-dependent oxidoreductase domain||Aldo/keto reductase subgroup||Aldo/keto reductase
PGSC0003DMG400016337	Alpha-isopropylmalate/homocitrate synthase, conserved site||2-isopropylmalate synthase LeuA, allosteric (dimerisation) domain||Aldolase-type TIM barrel||Pyruvate carboxyltransferase||2-isopropylmalate synthase, bacterial-type
PGSC0003DMG400016363	Transcription factor TCP subgroup||Transcription factor, TCP
PGSC0003DMG400016367	Ribosomal protein, zinc-binding domain||Ribosomal protein S27e, zinc-binding domain||Ribosomal protein S27e
PGSC0003DMG400016372	P-loop containing nucleoside triphosphate hydrolase||NB-ARC
PGSC0003DMG400016382	Ubiquitin-conjugating enzyme, E2||Ubiquitin-conjugating enzyme/RWD-like
PGSC0003DMG400016386	TB2/DP1/HVA22-related protein
PGSC0003DMG400016389	Brix domain||Anticodon-binding
PGSC0003DMG400016402	Cytochrome P450||Cytochrome P450, E-class, group IV||Cytochrome P450, conserved site
PGSC0003DMG400016411	Isochorismatase-like
PGSC0003DMG400016416	Protein of unknown function DUF2305
PGSC0003DMG400016422	Conserved gene of unknown function
PGSC0003DMG400016424	Leucine-rich repeat-containing N-terminal, type 2||Leucine-rich repeat
PGSC0003DMG400016462	Chaperonin-like RbcX
PGSC0003DMG400016478	Prephenate dehydratase||Prephenate dehydratase, conserved site||ACT domain
PGSC0003DMG400016507	Domain of unknown function DUF292, eukaryotic
PGSC0003DMG400016551	Conserved gene of unknown function
PGSC0003DMG400016573	Glutaredoxin subgroup||Thioredoxin-like fold||Glutaredoxin-like, plant II||Glutaredoxin
PGSC0003DMG400016578	F-box domain, cyclin-like||Kelch repeat type 1||Galactose oxidase, beta-propeller
PGSC0003DMG400016600	P-loop containing nucleoside triphosphate hydrolase||NB-ARC
PGSC0003DMG400016605	NTP pyrophosphohydrolase MazG, putative catalytic core||EAR||NTP Pyrophosphohydrolase MazG-related, RS21-C6
PGSC0003DMG400016608	Helix-loop-helix domain
PGSC0003DMG400016620	NADP-dependent oxidoreductase domain||Aldo/keto reductase||Cytochrome P450
PGSC0003DMG400016625	RNA-binding domain, S1||Nucleic acid-binding, OB-fold||Ribosomal protein S1, RNA-binding domain
PGSC0003DMG400016644	NAD(P)-binding domain||Dehydrogenase, multihelical||Glycerol-3-phosphate dehydrogenase, NAD-dependent, C-terminal||Glycerol-3-phosphate dehydrogenase, NAD-dependent, N-terminal||6-phosphogluconate dehydrogenase, C-terminal-like||Glycerol-3-phosphate dehydrogenase, NAD-dependent
PGSC0003DMG400016646	'chromo' domain containing protein
PGSC0003DMG400016651	Basic-leucine zipper domain
PGSC0003DMG400016669	Amidase||Amidase signature domain
PGSC0003DMG400016683	Multi antimicrobial extrusion protein
PGSC0003DMG400016699	Protein of unknown function DUF4228
PGSC0003DMG400016712	Zinc finger, PHD-finger||Zinc finger, FYVE/PHD-type||Zinc finger, RING/FYVE/PHD-type||Zinc finger, PHD-type||Zinc finger, PHD-type, conserved site||Bromo adjacent homology (BAH) domain
PGSC0003DMG400016794	Protein of unknown function DUF827, plant
PGSC0003DMG400016830	Uncharacterised conserved protein UCP030210||Domain of unknown function DUF89
PGSC0003DMG400016879	Peptidase M8, leishmanolysin||EGF-like, conserved site||Epidermal growth factor-like domain
PGSC0003DMG400016920	Splicing factor
PGSC0003DMG400016922	Zinc finger, CCHC-type||RNA recognition motif domain||Nucleotide-binding, alpha-beta plait
PGSC0003DMG400017022	B3 DNA binding domain||DNA-binding pseudobarrel domain
PGSC0003DMG400017035	Regulatory associated protein of TOR||Raptor N-terminal CASPase-like domain||WD40 repeat||Armadillo-like helical||WD40/YVTN repeat-like-containing domain||Armadillo-type fold||WD40-repeat-containing domain
PGSC0003DMG400017054	Protein kinase-like domain||Fructosamine/Ketosamine-3-kinase
PGSC0003DMG400017062	NB-ARC||Leucine-rich repeat||P-loop containing nucleoside triphosphate hydrolase
PGSC0003DMG400017069	Squalene cyclase||Terpenoid cyclases/protein prenyltransferase alpha-alpha toroid||Prenyltransferase/squalene oxidase
PGSC0003DMG400017091	Patatin/Phospholipase A2-related||Acyl transferase/acyl hydrolase/lysophospholipase
PGSC0003DMG400017147	TLDc
PGSC0003DMG400017158	Mammalian uncoordinated homology 13, domain 2||Munc13 homology 1||Protein of unknown function DUF810
PGSC0003DMG400017165	P-loop containing nucleoside triphosphate hydrolase||Kinesin-like protein||Kinesin, motor domain
PGSC0003DMG400017167	Protein kinase-like domain||Protein kinase, catalytic domain||Serine-threonine/tyrosine-protein kinase catalytic domain||Tyrosine-protein kinase, active site
PGSC0003DMG400017211	Glucose-methanol-choline oxidoreductase, N-terminal||Glucose-methanol-choline oxidoreductase, C-terminal||Alcohol dehydrogenase, long-chain fatty
PGSC0003DMG400017234	Drug/metabolite transporter
PGSC0003DMG400017290	PC-Esterase
PGSC0003DMG400017291	Leucine-rich repeat||Protein kinase, catalytic domain||Serine/threonine-protein kinase, active site||Protein kinase-like domain||Concanavalin A-like lectin/glucanase, subgroup||Serine-threonine/tyrosine-protein kinase catalytic domain||Malectin||Protein kinase, ATP binding site
PGSC0003DMG400017295	Transcription factor, K-box||Transcription factor, MADS-box
PGSC0003DMG400017396	Phytochrome||GAF domain||Signal transduction histidine kinase, subgroup 1, dimerisation/phosphoacceptor domain||ATPase-like, ATP-binding domain||PAS fold-2||PAC motif||Phytochrome chromophore binding site||Phytochrome A/B/C/D/E||GAF domain-like||PAS domain||Signal transduction histidine kinase, core||Phytochrome chromophore attachment domain||Phytochrome, central region||PAS fold
PGSC0003DMG400017465	Lipoxygenase, C-terminal||Lipoxygenase, conserved site||Lipoxygenase||Lipoxygenase, plant||Lipase/lipooxygenase, PLAT/LH2||Lipoxygenase, domain 3||Lipoxygenase, iron binding site||Lipoxygenase, LH2
PGSC0003DMG400017473	Amino acid transporter, transmembrane
PGSC0003DMG400017494	B-cell receptor-associated 31-like
PGSC0003DMG400017524	ABC transporter, transmembrane domain||ABC transporter, conserved site||AAA+ ATPase domain||ABC transporter-like||P-loop containing nucleoside triphosphate hydrolase||ABC transporter, transmembrane domain, type 1
PGSC0003DMG400017527	Tetratricopeptide-like helical||50S ribosomal protein L18Ae/60S ribosomal protein L20 and L18a||Pentatricopeptide repeat||Ribosomal protein L18a/LX
PGSC0003DMG400017562	TMP21-related||GOLD
PGSC0003DMG400017563	GOLD||TMP21-related
PGSC0003DMG400017572	Drug/metabolite transporter||Domain of unknown function DUF250
PGSC0003DMG400017577	Basic-leucine zipper domain
PGSC0003DMG400017605	BTB/POZ fold||BTB/POZ||NPH3 domain||BTB/POZ-like
PGSC0003DMG400017620	Proton-dependent oligopeptide transporter family||Major facilitator superfamily domain, general substrate transporter
PGSC0003DMG400017621	Proton-dependent oligopeptide transporter family||Major facilitator superfamily domain, general substrate transporter
PGSC0003DMG400017629	Domain of unknown function DUF4005||IQ motif, EF-hand binding site
PGSC0003DMG400017632	Thioredoxin-like fold||Thioredoxin, conserved site||Thioredoxin domain||Thioredoxin
PGSC0003DMG400017639	RNA recognition motif domain||Nucleotide-binding, alpha-beta plait
PGSC0003DMG400017654	Cyclin-dependent kinase inhibitor, plant||Cyclin-dependent kinase inhibitor
PGSC0003DMG400017662	SNARE associated Golgi protein
PGSC0003DMG400017688	Uncharacterized serine-rich protein C215.13
PGSC0003DMG400017707	4-hydroxyphenylpyruvate dioxygenase||Glyoxalase/Bleomycin resistance protein/Dihydroxybiphenyl dioxygenase||Glyoxalase/fosfomycin resistance/dioxygenase domain
PGSC0003DMG400017779	Serine-threonine/tyrosine-protein kinase catalytic domain||Adenovirus E3 region protein CR2||Protein kinase-like domain||Protein kinase, ATP binding site||Protein kinase, catalytic domain||Serine/threonine-protein kinase, active site
PGSC0003DMG400017784	Flavoprotein WrbA||NADPH-dependent FMN reductase||Flavoprotein-like||Flavodoxin/nitric oxide synthase
PGSC0003DMG400017873	Tetratricopeptide TPR-1||Tetratricopeptide-like helical
PGSC0003DMG400017969	Leucine-rich repeat
PGSC0003DMG400018015	Multi antimicrobial extrusion protein
PGSC0003DMG400018074	Zeta toxin domain||P-loop containing nucleoside triphosphate hydrolase
PGSC0003DMG400018080	RmlC-like jelly roll fold||Cysteamine dioxygenase||RmlC-like cupin domain
PGSC0003DMG400018132	Cytochrome P450, E-class, group I||Cytochrome P450, E-class, group IV||Cytochrome P450||Cytochrome P450, conserved site
PGSC0003DMG400018148	Pantothenate kinase, acetyl-CoA regulated, two-domain type||Domain of unknown function DUF89||Type II pantothenate kinase
PGSC0003DMG400018169	Cyclin-like
PGSC0003DMG400018234	Glutamyl-tRNA synthetase, class Ib, archaeal/eukaryotic cytosolic||Glutamyl/glutaminyl-tRNA synthetase, class Ib, catalytic domain||Rossmann-like alpha/beta/alpha sandwich fold||Glutamyl/glutaminyl-tRNA synthetase, class Ib, anti-codon binding domain||Glutathione S-transferase, C-terminal||Glutathione S-transferase, C-terminal-like||Aminoacyl-tRNA synthetase, class I, conserved site||Glutamyl/glu…
PGSC0003DMG400018256	Leucine-rich repeat||NB-ARC||Toll/interleukin-1 receptor homology (TIR) domain||P-loop containing nucleoside triphosphate hydrolase
PGSC0003DMG400018317	FBD||Leucine-rich repeat 2||F-box domain, cyclin-like
PGSC0003DMG400018345	DTW
PGSC0003DMG400018348	CAAX amino terminal protease
PGSC0003DMG400018353	Domain of unknown function DUF292, eukaryotic
PGSC0003DMG400018365	Tetratricopeptide-like helical||Pentatricopeptide repeat
PGSC0003DMG400018403	O-fucosyltransferase, plant||GDP-fucose protein O-fucosyltransferase
PGSC0003DMG400018405	Glycosyl transferase, family 31||Galectin, carbohydrate recognition domain||Concanavalin A-like lectin/glucanase, subgroup||Concanavalin A-like lectin/glucanases superfamily
PGSC0003DMG400018426	Myb domain, plants||MYB-CC type transcription factor, LHEQLE-containing domain||Homeodomain-like||SANT/Myb domain||Myb domain
PGSC0003DMG400018427	Homeodomain-like||SANT/Myb domain||Myb domain
PGSC0003DMG400018437	Cullin, N-terminal||Cullin homology||Winged helix-turn-helix transcription repressor DNA-binding||Anaphase-promoting complex subunit 2, C-terminal
PGSC0003DMG400018458	Glucose-methanol-choline oxidoreductase, N-terminal||Glucose-methanol-choline oxidoreductase, C-terminal||Alcohol dehydrogenase, long-chain fatty
PGSC0003DMG400018467	Domain of unknown function DUF1336||Lipid-binding START||Pleckstrin homology-like domain||Pleckstrin homology domain||START-like domain
PGSC0003DMG400018469	Basic-leucine zipper domain||G-box binding, MFMR
PGSC0003DMG400018479	P-loop containing nucleoside triphosphate hydrolase||ABC-2 type transporter||ABC transporter-like||AAA+ ATPase domain||ABC transporter, conserved site
PGSC0003DMG400018481	Carotenoid oxygenase
PGSC0003DMG400018483	Binding protein
PGSC0003DMG400018490	P-loop containing nucleoside triphosphate hydrolase||NB-ARC
PGSC0003DMG400018523	Glycoside hydrolase, family 17||Glycoside hydrolase, superfamily||Glycoside hydrolase, catalytic domain
PGSC0003DMG400018567	Mpv17/PMP22
PGSC0003DMG400018578	ENTH/VHS||Epsin domain, N-terminal||Epsin-like, N-terminal
PGSC0003DMG400018583	Conserved gene of unknown function
PGSC0003DMG400018605	Tetratricopeptide-like helical||Tetratricopeptide repeat||Tetratricopeptide repeat-containing domain
PGSC0003DMG400018611	Glycosyl transferase, family 17
PGSC0003DMG400018616	Multi antimicrobial extrusion protein
PGSC0003DMG400018622	Pyridoxal phosphate-dependent transferase, major domain||Aminotransferase, class I/classII||Pyridoxal phosphate-dependent transferase, major region, subdomain 2||Pyridoxal phosphate-dependent transferase, major region, subdomain 1
PGSC0003DMG400018675	AMP-binding, conserved site||AMP-dependent synthetase/ligase||Domain of unknown function DUF4009
PGSC0003DMG400018678	Auxin efflux carrier
PGSC0003DMG400018679	Hydroxymethylglutaryl-CoA reductase, class I/II, NAD/NADP-binding||Hydroxymethylglutaryl-CoA reductase, class I/II, catalytic domain||Hydroxymethylglutaryl-CoA reductase, class I/II, conserved site||Hydroxymethylglutaryl-CoA reductase, N-terminal||Hydroxymethylglutaryl-CoA reductase, class I/II||Hydroxymethylglutaryl-CoA reductase, class I/II, substrate-binding||Hydroxymethylglutaryl-CoA reductas…
PGSC0003DMG400018680	Mitochondrial substrate/solute carrier||Mitochondrial carrier domain
PGSC0003DMG400018683	Domain of unknown function DUF4378
PGSC0003DMG400018689	Cation/H+ exchanger
PGSC0003DMG400018713	NAD(P)-binding domain||Short-chain dehydrogenase/reductase, conserved site||Glucose/ribitol dehydrogenase||Short-chain dehydrogenase/reductase SDR
PGSC0003DMG400018717	HSP20-like chaperone||Alpha crystallin/Hsp20 domain
PGSC0003DMG400018754	UDP-glucuronosyl/UDP-glucosyltransferase
PGSC0003DMG400018763	Conserved gene of unknown function
PGSC0003DMG400018795	ABC transporter-like||ABC transporter, transmembrane domain||ABC transporter, conserved site||AAA+ ATPase domain||ABC transporter, transmembrane domain, type 1||P-loop containing nucleoside triphosphate hydrolase
PGSC0003DMG400018825	Pseudouridine synthase I, TruA, C-terminal
PGSC0003DMG400018831	Heat shock protein DnaJ, N-terminal||Domain of unknown function DUF3444
PGSC0003DMG400018857	Conserved gene of unknown function
PGSC0003DMG400018865	Leucine-rich repeat
PGSC0003DMG400018939	Serine/threonine- / dual-specificity protein kinase, catalytic domain||ACT domain||Protein kinase-like domain||Protein kinase, catalytic domain||Serine/threonine-protein kinase, active site||Serine-threonine/tyrosine-protein kinase catalytic domain
PGSC0003DMG400018947	Tetraspanin/Peripherin
PGSC0003DMG400018954	P-loop containing nucleoside triphosphate hydrolase||NB-ARC
PGSC0003DMG400019000	BTB/POZ-like||NPH3 domain||BTB/POZ fold
PGSC0003DMG400019030	Lipid-binding START||Homeodomain-like||Homeobox, conserved site||START-like domain||Homeodomain
PGSC0003DMG400019135	UVR domain
PGSC0003DMG400019159	Small GTPase superfamily||Small GTP-binding protein domain||P-loop containing nucleoside triphosphate hydrolase||Small GTPase superfamily, Rab type
PGSC0003DMG400019189	Fructose-1,6-bisphosphatase class 1/Sedoheputulose-1,7-bisphosphatase||Fructose-1,6-bisphosphatase||Fructose-1,6-bisphosphatase, active site
PGSC0003DMG400019206	RZZ complex, subunit Zw10||-
PGSC0003DMG400019236	Helix-loop-helix domain
PGSC0003DMG400019276	Protein kinase-like domain||Concanavalin A-like lectin/glucanase, subgroup||Serine/threonine-protein kinase, active site||Protein kinase, catalytic domain||Serine-threonine/tyrosine-protein kinase catalytic domain||S-locus glycoprotein||Protein kinase, ATP binding site||S-locus receptor kinase, C-terminal||Bulb-type lectin domain
PGSC0003DMG400019310	Transcription factor jumonji (JmjC) domain-containing protein
PGSC0003DMG400019376	Gene of unknown function
PGSC0003DMG400019395	Ubiquitin-conjugating enzyme/RWD-like||Ubiquitin-conjugating enzyme, active site||Ubiquitin-conjugating enzyme, E2
PGSC0003DMG400019397	Peptidase S8, subtilisin-related||Peptidase S8, subtilisin, Ser-active site||Peptidase S8/S53, subtilisin/kexin/sedolisin||Proteinase inhibitor I9
PGSC0003DMG400019405	Reticulon
PGSC0003DMG400019449	Galactose-binding domain-like||PITH domain||Thioredoxin
PGSC0003DMG400019465	Major facilitator superfamily||Major facilitator superfamily domain||Sugar transporter, conserved site||Major facilitator superfamily domain, general substrate transporter
PGSC0003DMG400019515	Nucleosome assembly protein (NAP)
PGSC0003DMG400019523	No apical meristem (NAM) protein
PGSC0003DMG400019582	Protein of unknown function DUF2854
PGSC0003DMG400019619	Domain of unknown function DUF1279
PGSC0003DMG400019622	Peptidase A1||Peptidase aspartic
PGSC0003DMG400019624	Transcription factor MYC/MYB N-terminal||Helix-loop-helix domain
PGSC0003DMG400019638	Glycoside hydrolase, family 29||Galactose-binding domain-like||Glycoside hydrolase, superfamily||Glycoside hydrolase, catalytic domain
PGSC0003DMG400019659	Helix-loop-helix domain
PGSC0003DMG400019678	Thioredoxin-like fold||Thioredoxin domain
PGSC0003DMG400019704	Essential meiotic endonuclease 1B
PGSC0003DMG400019706	DNA-binding WRKY
PGSC0003DMG400019716	P-loop containing nucleoside triphosphate hydrolase
PGSC0003DMG400019734	Phosphofructokinase domain||Phosphofructokinase||Pyrophosphate-dependent phosphofructokinase TP0108
PGSC0003DMG400019744	GRAM||C2 calcium-dependent membrane targeting
PGSC0003DMG400019747	Protein of unknown function DUF827, plant
PGSC0003DMG400019760	Pseudouridine-5'-phosphate glycosidase
PGSC0003DMG400019789	Exostosin-like||Epidermal growth factor-like domain||EGF-like, conserved site
PGSC0003DMG400019819	DNA glycosylase||Methyladenine glycosylase
PGSC0003DMG400019823	NDF1
PGSC0003DMG400019836	Pentatricopeptide repeat||Tetratricopeptide-like helical
PGSC0003DMG400019841	Gene of unknown function
PGSC0003DMG400019856	Poly A polymerase, head domain
PGSC0003DMG400019886	NAD(P)-binding domain||NAD-dependent epimerase/dehydratase
PGSC0003DMG400019895	GDP-fucose protein O-fucosyltransferase
PGSC0003DMG400019904	Transcription factor TCP subgroup||CYC/TB1, R domain||Transcription factor, TCP
PGSC0003DMG400019907	Ribokinase-like||PfkB
PGSC0003DMG400019935	Glycosyl transferase, family 31
PGSC0003DMG400019972	Dynamin, GTPase domain||Dynamin||Dynamin central domain||GTPase effector domain, GED||Dynamin GTPase effector||P-loop containing nucleoside triphosphate hydrolase
PGSC0003DMG400019983	Transferase
PGSC0003DMG400019991	Aldehyde dehydrogenase, C-terminal||Aldehyde/histidinol dehydrogenase||Aldehyde dehydrogenase domain
PGSC0003DMG400020029	Gene of unknown function
PGSC0003DMG400020066	Transcription factor MYC/MYB N-terminal||Helix-loop-helix domain
PGSC0003DMG400020074	Domain of unknown function DUF640
PGSC0003DMG400020078	Gnk2-homologous domain
PGSC0003DMG400020082	Conserved gene of unknown function
PGSC0003DMG400020100	SMAD/FHA domain||Forkhead-associated (FHA) domain
PGSC0003DMG400020143	Gene of unknown function
PGSC0003DMG400020153	DENN domain||dDENN domain
PGSC0003DMG400020170	Cytochrome P450, conserved site||Cytochrome P450||Cytochrome P450, E-class, group I
PGSC0003DMG400020212	Oxidoreductase, molybdopterin-binding domain||Eukaryotic molybdopterin oxidoreductase||Immunoglobulin E-set||Moybdenum cofactor oxidoreductase, dimerisation
PGSC0003DMG400020231	Domain of unknown function DUF4009||Acetate-CoA ligase||AMP-binding, conserved site||AMP-dependent synthetase/ligase
PGSC0003DMG400020262	EEIG1/EHBP1 N-terminal domain
PGSC0003DMG400020269	Glucose-6-phosphate dehydrogenase||Glucose-6-phosphate dehydrogenase, NAD-binding||Glucose-6-phosphate dehydrogenase, C-terminal||NAD(P)-binding domain||Glucose-6-phosphate dehydrogenase, active site
PGSC0003DMG400020321	Major facilitator superfamily domain||Major facilitator superfamily||Major facilitator superfamily domain, general substrate transporter
PGSC0003DMG400020325	ClpP/crotonase-like domain||Acetyl-coenzyme A carboxyltransferase, C-terminal||Acetyl-CoA carboxylase, alpha subunit
PGSC0003DMG400020338	Homeodomain-like||Myb domain||SANT/Myb domain
PGSC0003DMG400020355	Cupredoxin||Multicopper oxidase, copper-binding site||Multicopper oxidase, type 3||Laccase||Multicopper oxidase, type 2||Multicopper oxidase, type 1
PGSC0003DMG400020424	F-box associated interaction domain||F-box domain, cyclin-like
PGSC0003DMG400020431	PMR5 N-terminal domain||PC-Esterase
PGSC0003DMG400020472	Zinc finger, PHD-type, conserved site||Zinc finger, PHD-type||Zinc finger, RING/FYVE/PHD-type||Zinc finger, FYVE/PHD-type
PGSC0003DMG400020493	Calcium-binding EF-hand||Calcineurin B protein||EF-hand-like domain||EF-Hand 1, calcium-binding site
PGSC0003DMG400020497	Barwin-like endoglucanase||Expansin/Lol pI||Barwin-related endoglucanase||Pollen allergen/expansin, C-terminal||Expansin/pollen allergen, DPBB domain
PGSC0003DMG400020502	Mu homology domain||Clathrin adaptor, mu subunit, C-terminal||Longin-like domain||Clathrin adaptor, mu subunit, conserved site||Clathrin adaptor, mu subunit
PGSC0003DMG400020507	F-box domain, cyclin-like
PGSC0003DMG400020515	2-oxo acid dehydrogenase, lipoyl-binding site||Glycine cleavage H-protein, subgroup||Single hybrid motif||Glycine cleavage H-protein
PGSC0003DMG400020520	Leucine-rich repeat||Leucine rich repeats (2 copies)
PGSC0003DMG400020525	Cystathionine beta-synthase, core
PGSC0003DMG400020546	Leucine-rich repeat, typical subtype||Ubiquitin||Leucine rich repeats (2 copies)||Ubiquitin-related domain||Leucine-rich repeat
PGSC0003DMG400020553	Gene of unknown function
PGSC0003DMG400020554	Pentatricopeptide repeat
PGSC0003DMG400020559	Gamma interferon inducible lysosomal thiol reductase GILT
PGSC0003DMG400020620	Acyl-CoA dehydrogenase/oxidase C-terminal||Acyl-CoA oxidase||Acyl-CoA oxidase, C-terminal||Acyl-CoA dehydrogenase/oxidase||Acyl-CoA oxidase/dehydrogenase, central domain
PGSC0003DMG400020645	Uncharacterised protein family Ycf54
PGSC0003DMG400020655	Frigida-like
PGSC0003DMG400020685	Argonaute/Dicer protein, PAZ||Stem cell self-renewal protein Piwi||Ribonuclease H-like domain
PGSC0003DMG400020694	Nucleic acid-binding, OB-fold
PGSC0003DMG400020700	Alkaline phosphatase-like, alpha/beta/alpha||Type I phosphodiesterase/nucleotide pyrophosphatase/phosphate transferase||Alkaline-phosphatase-like, core domain
PGSC0003DMG400020717	RNA recognition motif domain||RNA-processing protein, HAT helix||Nucleotide-binding, alpha-beta plait||LSM-interacting domain||Suppressor of forked
PGSC0003DMG400020762	Alpha/Beta hydrolase fold||Alpha/beta hydrolase fold-5
PGSC0003DMG400020777	Gene of unknown function
PGSC0003DMG400020781	RNA helicase, DEAD-box type, Q motif||P-loop containing nucleoside triphosphate hydrolase||Helicase, superfamily 1/2, ATP-binding domain||Helicase, C-terminal||DNA/RNA helicase, DEAD/DEAH box type, N-terminal
PGSC0003DMG400020795	Haem peroxidase, plant/fungal/bacterial||Peroxidase, active site||Haem peroxidase||Plant peroxidase
PGSC0003DMG400020801	Peroxidases heam-ligand binding site||Haem peroxidase, plant/fungal/bacterial||Peroxidase, active site||Haem peroxidase||Plant peroxidase
PGSC0003DMG400020803	Ribosomal protein S8e||Ribosomal protein S8e, conserved site||Ribosomal protein S8e/ribosomal biogenesis NSA2
PGSC0003DMG400020828	Small GTP-binding protein domain||P-loop containing nucleoside triphosphate hydrolase||Small GTPase superfamily, Rab type||Small GTPase superfamily
PGSC0003DMG400020869	Major facilitator superfamily domain, general substrate transporter||Major facilitator superfamily domain||Major facilitator superfamily
PGSC0003DMG400020891	Gene of unknown function
PGSC0003DMG400020952	Alpha/beta hydrolase fold-5||Alpha/Beta hydrolase fold
PGSC0003DMG400020990	Conserved gene of unknown function
PGSC0003DMG400020996	SANT/Myb domain||Homeodomain-like||Protein of unknown function DUF3755
PGSC0003DMG400021015	Sulfotransferase domain||P-loop containing nucleoside triphosphate hydrolase
PGSC0003DMG400021028	Conserved gene of unknown function
PGSC0003DMG400021067	Leucine-rich repeat||Leucine-rich repeat-containing N-terminal, type 2
PGSC0003DMG400021072	Plastid lipid-associated protein/fibrillin conserved domain
PGSC0003DMG400021074	Late blight resistance protein
PGSC0003DMG400021101	Amino acid permease domain||Na/K/Cl co-transporter superfamily
PGSC0003DMG400021105	Toprim domain||Twinkle protein
PGSC0003DMG400021168	ATPase, AAA-type, core||P-loop containing nucleoside triphosphate hydrolase||AAA+ ATPase domain
PGSC0003DMG400021204	Lateral organ boundaries, LOB
PGSC0003DMG400021242	Mg2+ transporter protein, CorA-like/Zinc transport protein ZntB
PGSC0003DMG400021245	Regulator of chromosome condensation, RCC1||Regulator of chromosome condensation/beta-lactamase-inhibitor protein II
PGSC0003DMG400021248	FMN-dependent alpha-hydroxy acid dehydrogenase, active site||Alpha-hydroxy acid dehydrogenase, FMN-dependent||FMN-dependent dehydrogenase||Aldolase-type TIM barrel
PGSC0003DMG400021249	Nucleotide-binding, alpha-beta plait||RNA recognition motif domain||Ataxin-2, C-terminal
PGSC0003DMG400021261	Multi antimicrobial extrusion protein
PGSC0003DMG400021276	Pyridoxal phosphate-dependent transferase, major region, subdomain 1||Pyridoxal phosphate-dependent transferase, major domain||Aminotransferase, class I/classII||Pyridoxal phosphate-dependent transferase, major region, subdomain 2||Tyrosine/nicotianamine aminotransferase||Tyrosine transaminase||Aminotransferases, class-I, pyridoxal-phosphate-binding site
PGSC0003DMG400021286	Alpha/Beta hydrolase fold||Lipase, class 3
PGSC0003DMG400021287	Chlorophyll a/b binding protein domain||Chlorophyll A-B binding protein, plant||Chlorophyll A-B binding protein
PGSC0003DMG400021308	EF-Hand 1, calcium-binding site||Calcium-binding EF-hand||EF-hand-like domain
PGSC0003DMG400021310	Zinc finger, RING/FYVE/PHD-type||Zinc finger, RING-type
PGSC0003DMG400021313	Gene of unknown function
PGSC0003DMG400021323	Homeodomain-like||Homeobox KN domain||POX||Homeodomain
PGSC0003DMG400021331	t-SNARE||Target SNARE coiled-coil domain||Syntaxin/epimorphin, conserved site||Syntaxin, N-terminal
PGSC0003DMG400021336	START-like domain
PGSC0003DMG400021337	Heat shock protein DnaJ, N-terminal||Co-chaperone Hsc20||Heat shock cognate protein B, C-terminal oligomerisation
PGSC0003DMG400021341	Sucrose-phosphate synthase||HAD-like domain||HAD-superfamily hydrolase, subfamily IIB||Sucrose-phosphate phosphatase||Sucrose-6-phosphate phosphohydrolase C-terminal
PGSC0003DMG400021342	Serine/threonine-protein kinase, active site||Protein kinase, catalytic domain||Serine/threonine- / dual-specificity protein kinase, catalytic domain||Protein kinase-like domain||EF-Hand 1, calcium-binding site||EF-hand-like domain||Protein kinase, ATP binding site||Calcium-binding EF-hand
PGSC0003DMG400021343	ABC transporter-like||ABC-2 type transporter||AAA+ ATPase domain||ABC transporter, conserved site||P-loop containing nucleoside triphosphate hydrolase
PGSC0003DMG400021345	Conserved gene of unknown function
PGSC0003DMG400021362	Acyl transferase||Malonyl-CoA ACP transacylase, ACP-binding||Acyl transferase/acyl hydrolase/lysophospholipase||Malonyl CoA-acyl carrier protein transacylase||Acyl transferase domain||Malonyl CoA-acyl carrier protein transacylase, FabD-type
PGSC0003DMG400021365	CCAAT-binding transcription factor, subunit B
PGSC0003DMG400021370	Gene of unknown function
PGSC0003DMG400021373	Zinc finger, RING/FYVE/PHD-type||Zinc finger, RING-type
PGSC0003DMG400021376	Exonuclease, RNase T/DNA polymerase III||Ribonuclease H-like domain||Exonuclease
PGSC0003DMG400021378	P-loop containing nucleoside triphosphate hydrolase||Helicase, superfamily 1/2, ATP-binding domain||Double-stranded RNA-binding-like||Domain of unknown function DUF1605||Helicase, C-terminal||Helicase-associated domain||DNA/RNA helicase, DEAD/DEAH box type, N-terminal
PGSC0003DMG400021382	Catalase core domain||Acyl carrier protein-like||Catalase-like domain||Catalase, mono-functional, haem-containing||AMP-dependent synthetase/ligase||Trimeric LpxA-like||AMP-binding, conserved site||Phosphopantetheine attachment site
PGSC0003DMG400021445	Cyclophilin-like domain||Zinc finger, RING/FYVE/PHD-type||U box domain||Cyclophilin-type peptidyl-prolyl cis-trans isomerase, conserved site||Cyclophilin-like peptidyl-prolyl cis-trans isomerase domain
PGSC0003DMG400021448	Eukaryotic porin/Tom40||Porin domain
PGSC0003DMG400021498	Syntaxin
PGSC0003DMG400021499	CTP synthase||Class I glutamine amidotransferase-like||Glutamine amidotransferase type 1||P-loop containing nucleoside triphosphate hydrolase||CTP synthase, N-terminal
PGSC0003DMG400021515	t-SNARE||Syntaxin 6, N-terminal
PGSC0003DMG400021527	Phosphoribosyltransferase domain||Adenine phosphoribosyl transferase||Phosphoribosyltransferase-like
PGSC0003DMG400021534	Cytochrome b5, heme-binding site||Cytochrome b5
PGSC0003DMG400021537	Protein of unknown function DUF620
PGSC0003DMG400021546	Conserved gene of unknown function
PGSC0003DMG400021550	Adenosine kinase||PfkB||Ribokinase-like||Carbohydrate/puine kinase, PfkB, conserved site
PGSC0003DMG400021561	Cytokinin riboside 5'-monophosphate phosphoribohydrolase LOG
PGSC0003DMG400021582	Pyridoxal phosphate-dependent transferase, major domain||Aminotransferase, class I/classII||Pyridoxal phosphate-dependent transferase, major region, subdomain 2||Pyridoxal phosphate-dependent transferase, major region, subdomain 1
PGSC0003DMG400021593	ATP/GTP nucleotide-binding protein
PGSC0003DMG400021594	Autophagy-related protein 3, N-terminal||Autophagy-related protein 3, C-terminal||Autophagy-related protein 3
PGSC0003DMG400021606	Peptidase A1||Peptidase aspartic
PGSC0003DMG400021611	Conserved gene of unknown function
PGSC0003DMG400021630	Glycoside hydrolase, family 28||Pectin lyase fold||Pectin lyase fold/virulence factor||Parallel beta-helix repeat
PGSC0003DMG400021658	Pectin lyase fold/virulence factor||Parallel beta-helix repeat||Glycoside hydrolase, family 28||Pectin lyase fold
PGSC0003DMG400021666	Epoxide hydrolase-like||Alpha/Beta hydrolase fold||Alpha/beta hydrolase fold-1
PGSC0003DMG400021670	EF-Hand 1, calcium-binding site||-||Calcium-binding EF-hand||EF-hand-like domain||FAD-dependent pyridine nucleotide-disulphide oxidoreductase||Pyridine nucleotide-disulphide oxidoreductase, NAD-binding domain||Pyridine nucleotide-disulphide oxidoreductase, FAD/NAD(P)-binding domain
PGSC0003DMG400021674	SCAMP
PGSC0003DMG400021675	Conserved gene of unknown function
PGSC0003DMG400021680	Engulfment/cell motility, ELMO
PGSC0003DMG400021750	Conserved gene of unknown function
PGSC0003DMG400021755	DWNN domain||Zinc finger, RING-type||Zinc finger, RING/FYVE/PHD-type||Zinc finger, RING-type, conserved site
PGSC0003DMG400021789	Protein kinase, catalytic domain||Serine/threonine-protein kinase, active site||Protein kinase-like domain||Concanavalin A-like lectin/glucanase, subgroup||Leucine-rich repeat||Leucine-rich repeat-containing N-terminal, type 2||Leucine rich repeats (2 copies)||Protein kinase, ATP binding site||Serine-threonine/tyrosine-protein kinase catalytic domain
PGSC0003DMG400021831	NAD(P)-binding domain||Myo-inositol-1-phosphate synthase||Myo-inositol-1-phosphate synthase, GAPDH-like
PGSC0003DMG400021867	Replication factor A, C-terminal||Saposin-like type B, 1||Nucleic acid-binding, OB-fold||Saposin-like||Saposin B
PGSC0003DMG400021869	Conserved gene of unknown function
PGSC0003DMG400021879	Tic22-like
PGSC0003DMG400021891	SP1L
PGSC0003DMG400021902	Transcription factor, SBP-box
PGSC0003DMG400021949	Plant disease resistance response protein
PGSC0003DMG400022011	Homeobox KN domain||Homeodomain||POX||Homeodomain-like
PGSC0003DMG400022025	Pyridine nucleotide-disulphide oxidoreductase, class-II||Flavin monooxygenase-like||FAD-dependent pyridine nucleotide-disulphide oxidoreductase
PGSC0003DMG400022027	IQ motif, EF-hand binding site||P-loop containing nucleoside triphosphate hydrolase||Dil domain||Dilute||Myosin head, motor domain||Myosin, N-terminal, SH3-like
PGSC0003DMG400022033	Mitochondrial inner membrane translocase subunit Tim17/Tim22/Tim23/peroxisomal protein PMP24
PGSC0003DMG400022036	Tetratricopeptide-like helical||Pentatricopeptide repeat
PGSC0003DMG400022078	DDB2
PGSC0003DMG400022088	Transketolase, C-terminal||Transketolase, bacterial-like||Transketolase-like, pyrimidine-binding domain||Transketolase, N-terminal||Thiamin diphosphate-binding fold||Transketolase, C-terminal/Pyruvate-ferredoxin oxidoreductase, domain II||Transketolase binding site
PGSC0003DMG400022094	START-like domain||Bet v I domain
PGSC0003DMG400022134	No apical meristem (NAM) protein
PGSC0003DMG400022148	Actin-like||F-box domain, cyclin-like
PGSC0003DMG400022154	Late embryogenesis abundant protein, LEA-14
PGSC0003DMG400022166	CRAL-TRIO domain||CRAL/TRIO, N-terminal domain
PGSC0003DMG400022168	GOLD||TMP21-related
PGSC0003DMG400022174	UPA24
PGSC0003DMG400022178	HAD-like domain||Mitochondrial import inner membrane translocase subunit Tim50||NLI interacting factor||-
PGSC0003DMG400022217	YjgF/Yer057p/UK114 family||Endoribonuclease L-PSP/chorismate mutase-like||YjgF-like protein, conserved site||YjgF-like protein
PGSC0003DMG400022243	DNA methylase, N-6 adenine-specific, conserved site||S-adenosyl-L-methionine-dependent methyltransferase-like||Modification methylase HemK||Ribosomal L11 methyltransferase, PrmA
PGSC0003DMG400022263	Aldolase-type TIM barrel||Fructose-bisphosphate aldolase class-I active site||Fructose-bisphosphate aldolase, class-I||Fructose-bisphosphate aldolase class-I, eukaryotic-type
PGSC0003DMG400022268	ABC-2 type transporter||ABC transporter-like||AAA+ ATPase domain||Uncharacterised protein family UPF0118||P-loop containing nucleoside triphosphate hydrolase
PGSC0003DMG400022276	Inner centromere protein, ARK-binding domain
PGSC0003DMG400022278	DHS-like NAD/FAD-binding domain||Sirtuin family, catalytic core domain||Sirtuin family
PGSC0003DMG400022298	Vacuolar protein sorting-associate Vta1, N-terminal
PGSC0003DMG400022300	Trigger factor/SurA domain||Trigger factor, C-terminal, bacterial||Trigger factor, ribosome-binding, bacterial||Peptidyl-prolyl cis-trans isomerase, FKBP-type, domain||Trigger factor
PGSC0003DMG400022304	Protein of unknown function DUF3537
PGSC0003DMG400022320	Conserved gene of unknown function
PGSC0003DMG400022355	Nucleic acid-binding, OB-fold
PGSC0003DMG400022379	Epoxide hydrolase-like||Alpha/Beta hydrolase fold||Alpha/beta hydrolase fold-1
PGSC0003DMG400022403	Armadillo-type fold||Armadillo||Armadillo-like helical
PGSC0003DMG400022412	IQ motif, EF-hand binding site||P-loop containing nucleoside triphosphate hydrolase
PGSC0003DMG400022414	Domain of unknown function DUF4408||Protein of unknown function DUF761, plant
PGSC0003DMG400022417	Organic solute transporter Ost-alpha
PGSC0003DMG400022489	Membrane transporter, Tim44-related/Ribosomal protein L45
PGSC0003DMG400022506	CMP/dCMP deaminase, zinc-binding||APOBEC/CMP deaminase, zinc-binding||Cytidine deaminase-like
PGSC0003DMG400022508	Protein of unknown function DUF2358
PGSC0003DMG400022526	Peptidase A1||Peptidase aspartic, active site||Peptidase aspartic
PGSC0003DMG400022537	Zinc finger, FYVE/PHD-type||Zinc finger, PHD-finger||GYF||Zinc finger, RING/FYVE/PHD-type||Zinc finger, RING-type||Zinc finger, PHD-type||Zinc finger, PHD-type, conserved site
PGSC0003DMG400022541	Haem peroxidase, plant/fungal/bacterial||Peroxidases heam-ligand binding site||Peroxidase, active site||Plant peroxidase||Haem peroxidase
PGSC0003DMG400022547	ATPase, AAA-type, core||P-loop containing nucleoside triphosphate hydrolase||AAA-type ATPase, N-terminal domain
PGSC0003DMG400022569	Proteasome, subunit alpha/beta||Nucleophile aminohydrolases, N-terminal||Proteasome B-type subunit||Proteasome, beta-type subunit, conserved site
PGSC0003DMG400022572	AAA+ ATPase domain||AAA-type ATPase, N-terminal domain||P-loop containing nucleoside triphosphate hydrolase||ATPase, AAA-type, core||ATPase, AAA-type, conserved site
PGSC0003DMG400022573	P-loop containing nucleoside triphosphate hydrolase||ATPase, AAA-type, core||ATPase, AAA-type, conserved site||AAA+ ATPase domain||AAA-type ATPase, N-terminal domain
PGSC0003DMG400022574	ATPase, AAA-type, conserved site||ATPase, AAA-type, core||P-loop containing nucleoside triphosphate hydrolase||AAA-type ATPase, N-terminal domain||AAA+ ATPase domain
PGSC0003DMG400022589	Basic-leucine zipper domain
PGSC0003DMG400022597	Glucose/Sorbosone dehydrogenase||Soluble quinoprotein glucose/sorbosone dehydrogenase||Six-bladed beta-propeller, TolB-like
PGSC0003DMG400022611	Alpha/Beta hydrolase fold||Peptidase S10, serine carboxypeptidase, active site||Peptidase S10, serine carboxypeptidase
PGSC0003DMG400022656	Zinc finger, RING-type||Zinc finger, RING/FYVE/PHD-type||Rubredoxin-type fold||Zinc finger, CTCHY-type||Zinc finger, CHY-type
PGSC0003DMG400022660	F-box domain, cyclin-like
PGSC0003DMG400022684	Gene of unknown function
PGSC0003DMG400022689	Homeodomain-like||Myb domain||SANT/Myb domain
PGSC0003DMG400022699	Leucine-rich repeat||NB-ARC||P-loop containing nucleoside triphosphate hydrolase||Toll/interleukin-1 receptor homology (TIR) domain
PGSC0003DMG400022715	Alkaline-phosphatase-like, core domain||Phosphoesterase
PGSC0003DMG400022716	Phospholipase A2
PGSC0003DMG400022721	Gene of unknown function
PGSC0003DMG400022742	Aminotransferase class-III||Pyridoxal phosphate-dependent transferase, major region, subdomain 1||Pyridoxal phosphate-dependent transferase, major region, subdomain 2||Transaminase, Acetylornithine/Succinylornithine family||Pyridoxal phosphate-dependent transferase, major domain
PGSC0003DMG400022756	UAA transporter
PGSC0003DMG400022766	Protein kinase, ATP binding site||Protein kinase-like domain||Protein kinase, catalytic domain
PGSC0003DMG400022767	Nonaspanin (TM9SF)
PGSC0003DMG400022770	Dolichol-phosphate mannosyltransferase subunit 3
PGSC0003DMG400022779	Membrane attack complex component/perforin (MACPF) domain
PGSC0003DMG400022783	CRAL/TRIO, N-terminal domain||CRAL-TRIO domain
PGSC0003DMG400022788	Microtubule-associated protein, MAP65/ASE1-type
PGSC0003DMG400022791	Concanavalin A-like lectin/glucanases superfamily||Glycoside hydrolase, family 16||Concanavalin A-like lectin/glucanase, subgroup||Xyloglucan endo-transglycosylase, C-terminal||Xyloglucan endotransglucosylase/hydrolase
PGSC0003DMG400022807	ROX1
PGSC0003DMG400022810	Mitochondrial substrate/solute carrier||Mitochondrial carrier domain
PGSC0003DMG400022819	Conserved gene of unknown function
PGSC0003DMG400022824	Squamosa promoter-binding protein||Transcription factor, SBP-box
PGSC0003DMG400022827	Fatty acid desaturase, type 1||Sphingolipid delta4-desaturase, N-terminal||Sphingolipid delta4-desaturase
PGSC0003DMG400022829	Cystathionine beta-synthase, core
PGSC0003DMG400022830	snRNA-activating protein complex, subunit 3||Methyl-accepting chemotaxis protein (MCP) signalling domain||-
PGSC0003DMG400022858	Galactose oxidase/kelch, beta-propeller||F-box associated interaction domain||F-box associated domain, type 1||F-box domain, cyclin-like
PGSC0003DMG400022904	Protein of unknown function DUF936, plant
PGSC0003DMG400022911	Alpha/Beta hydrolase fold
PGSC0003DMG400022921	Alpha/Beta hydrolase fold
PGSC0003DMG400022933	Glycoside hydrolase family 3||Glycoside hydrolase, family 3, N-terminal||Glycoside hydrolase, superfamily||Glycoside hydrolase family 3 C-terminal domain||Fibronectin type III-like domain
PGSC0003DMG400022955	Haem peroxidase, plant/fungal/bacterial||Peroxidases heam-ligand binding site||Plant peroxidase||Haem peroxidase||Peroxidase, active site
PGSC0003DMG400022957	Myosin heavy chain, embryonic smooth muscle isoform
PGSC0003DMG400023001	LPA2
PGSC0003DMG400023037	F-box associated interaction domain
PGSC0003DMG400023082	Oxoglutarate/iron-dependent dioxygenase||Isopenicillin N synthase-like
PGSC0003DMG400023084	LMBR1-like membrane protein
PGSC0003DMG400023092	C2 calcium-dependent membrane targeting||Tensin phosphatase, C2 domain||Protein-tyrosine phosphatase, active site||Protein-tyrosine phosphatase-like||Dual specificity phosphatase, catalytic domain||Tensin phosphatase, lipid phosphatase domain
PGSC0003DMG400023105	Gene of unknown function
PGSC0003DMG400023140	Polyprotein
PGSC0003DMG400023165	Conserved gene of unknown function
PGSC0003DMG400023169	Alcohol dehydrogenase, C-terminal||NAD(P)-binding domain||Alcohol dehydrogenase GroES-like||Alcohol dehydrogenase superfamily, zinc-type||GroES-like
PGSC0003DMG400023173	Copper amine oxidase, N2-terminal||Copper amine oxidase, N-terminal||Copper amine oxidase, N3-terminal||Copper amine oxidase||Copper amine oxidase, N2/N3-terminal||Copper amine oxidase, C-terminal
PGSC0003DMG400023217	C2 calcium-dependent membrane targeting
PGSC0003DMG400023260	Transcription factor, SBP-box
PGSC0003DMG400023319	Alcohol dehydrogenase, C-terminal||NAD(P)-binding domain||Alcohol dehydrogenase GroES-like||Alcohol dehydrogenase, zinc-type, conserved site||GroES-like||Alcohol dehydrogenase superfamily, zinc-type
PGSC0003DMG400023329	Leucine-rich repeat-containing N-terminal, type 2||Serine/threonine-protein kinase, active site||Protein kinase, catalytic domain||Protein kinase, ATP binding site||Protein kinase-like domain||Concanavalin A-like lectin/glucanase, subgroup||Leucine-rich repeat
PGSC0003DMG400023332	Smr protein/MutS2 C-terminal||Domain of unknown function DUF1771
PGSC0003DMG400023338	Aldolase-type TIM barrel||Ribulose-phosphate binding barrel||Histidine biosynthesis||Phosphoribosylformimino-5-aminoimidazole carboxamide ribotide isomerase, eukaryotic
PGSC0003DMG400023353	Pre-mRNA processing ribonucleoprotein, snoRNA-binding domain||NOSIC||NOP5, N-terminal
PGSC0003DMG400023356	UDP-glucuronosyl/UDP-glucosyltransferase
PGSC0003DMG400023359	NUDIX hydrolase domain||Isopentenyl-diphosphate delta-isomerase, type 1||NUDIX hydrolase domain-like
PGSC0003DMG400023360	DNA-binding WRKY
PGSC0003DMG400023383	Domain of unknown function DUF367||RNase L inhibitor RLI, possible metal-binding domain||Ribosome biogenesis protein
PGSC0003DMG400023390	Alpha/Beta hydrolase fold
PGSC0003DMG400023403	Metallo-dependent phosphatase-like||Serine/threonine-specific protein phosphatase/bis(5-nucleosyl)-tetraphosphatase||Metallophosphoesterase domain
PGSC0003DMG400023414	Plant disease resistance response protein||Protein of unknown function DUF284, transmembrane eukaryotic
PGSC0003DMG400023422	Methionine-tRNA synthetase, type 2||Rossmann-like alpha/beta/alpha sandwich fold||Methionyl/Leucyl tRNA synthetase||Aminoacyl-tRNA synthetase, class 1a, anticodon-binding||Methionyl-tRNA synthetase
PGSC0003DMG400023424	Ribosomal protein 60S||Ribosomal protein L10/acidic P0
PGSC0003DMG400023427	DNA/RNA-binding protein Kin17, conserved domain||Zinc finger, C2H2-like
PGSC0003DMG400023447	No apical meristem (NAM) protein
PGSC0003DMG400023450	RNA recognition motif 2
PGSC0003DMG400023455	Pyruvate/Phosphoenolpyruvate kinase
PGSC0003DMG400023458	Phenylalanine ammonia-lyase||L-Aspartase-like, N-terminal||L-Aspartase-like||Aromatic amino acid lyase||Phenylalanine ammonia-lyase, shielding domain||Phenylalanine/histidine ammonia-lyases, active site
PGSC0003DMG400023463	Patatin/Phospholipase A2-related||Acyl transferase/acyl hydrolase/lysophospholipase
PGSC0003DMG400023467	Homeodomain-like||Myb domain, plants||MYB-CC type transcription factor, LHEQLE-containing domain||SANT/Myb domain||Myb domain
PGSC0003DMG400023471	Single-stranded nucleic acid binding R3H||SUZ domain
PGSC0003DMG400023472	HAD-like domain||HAD-superfamily hydrolase, subfamily IA, variant 1
PGSC0003DMG400023475	Protein-tyrosine phosphatase-like||Protein-tyrosine phosphatase, active site||Protein-tyrosine phosphatase, SIW14-like||Protein-tyrosine phosphatase, dual specificity phosphatase, eukaryotic
PGSC0003DMG400023482	K Homology domain||K Homology domain, type 1
PGSC0003DMG400023490	ABC transporter-like||ABC-2 type transporter||AAA+ ATPase domain||ABC-transporter extracellular N-terminal domain||P-loop containing nucleoside triphosphate hydrolase||Plant PDR ABC transporter associated
PGSC0003DMG400023495	Homeodomain-like||Myb domain, plants||Myb domain||SANT domain||SANT/Myb domain
PGSC0003DMG400023496	eRF1 domain 1/Pelota-like||50S ribosomal protein L30e-like||eRF1 domain 2||eRF1 domain 3||Peptide Chain Release Factor eRF1/aRF1, N-terminal||Peptide chain release factor eRF1/aRF1
PGSC0003DMG400023497	P-loop containing nucleoside triphosphate hydrolase||Clp, N-terminal||Double Clp-N motif
PGSC0003DMG400023503	Zinc finger, RING-type||Zinc finger, RING/FYVE/PHD-type||Peroxisome assembly protein 12||Pex, N-terminal
PGSC0003DMG400023510	Ankyrin repeat||Caskin/Ankyrin repeat-containing protein||PGG domain||Ankyrin repeat-containing domain
PGSC0003DMG400023511	Exo70 exocyst complex subunit||Cullin repeat-like-containing domain
PGSC0003DMG400023517	Chloroplast protein import component Tic20
PGSC0003DMG400023532	Conserved gene of unknown function
PGSC0003DMG400023537	Heat shock protein DnaJ, N-terminal
PGSC0003DMG400023556	Transcription factor GRAS
PGSC0003DMG400023566	Nonaspanin (TM9SF)||Major facilitator superfamily domain, general substrate transporter
PGSC0003DMG400023568	WD40/YVTN repeat-like-containing domain||WD40-repeat-containing domain||G-protein beta WD-40 repeat||WD40 repeat||WD40 repeat, conserved site
PGSC0003DMG400023574	Protein kinase, ATP binding site||Concanavalin A-like lectin/glucanase, subgroup||Protein kinase-like domain||Protein kinase, catalytic domain||Tyrosine-protein kinase, active site
PGSC0003DMG400023589	Armadillo-like helical||Protein kinase, catalytic domain||WD40-repeat-containing domain||Armadillo-type fold||Serine/threonine-protein kinase, active site||Protein kinase-like domain||WD40 repeat||HEAT||WD40/YVTN repeat-like-containing domain
PGSC0003DMG400023607	BAG domain||IQ motif, EF-hand binding site
PGSC0003DMG400023610	Serine/threonine-protein kinase, active site||Protein kinase, catalytic domain||Protein kinase-like domain||Serine-threonine/tyrosine-protein kinase catalytic domain||Serine/threonine-protein kinase HT1, plant
PGSC0003DMG400023618	Zinc finger, C2H2-like||Zinc finger, C2H2
PGSC0003DMG400023658	Phosphatidylinositol-4-phosphate 5-kinase, core||Phosphatidylinositol-4-phosphate 5-kinase, N-terminal domain||Phosphatidylinositol-4-phosphate 5-kinase||Phosphatidylinositol-4-phosphate 5-kinase, C-terminal
PGSC0003DMG400023668	PC-Esterase||PMR5 N-terminal domain
PGSC0003DMG400023669	WRC
PGSC0003DMG400023681	Multi antimicrobial extrusion protein
PGSC0003DMG400023685	Protein of unknown function DUF1138
PGSC0003DMG400023703	Kelch repeat type 1||F-box domain, cyclin-like||Galactose oxidase, beta-propeller
PGSC0003DMG400023707	Homeodomain-like||Leucine zipper, homeobox-associated||Homeobox, conserved site||Homeodomain
PGSC0003DMG400023708	Actin, conserved site||Actin/actin-like conserved site||Actin-like
PGSC0003DMG400023719	Ankyrin repeat||Ankyrin repeat-containing domain||Zinc finger, CCCH-type
PGSC0003DMG400023722	Pentatricopeptide repeat
PGSC0003DMG400023732	UDP-glucuronosyl/UDP-glucosyltransferase
PGSC0003DMG400023754	Acyl transferase/acyl hydrolase/lysophospholipase||Patatin/Phospholipase A2-related
PGSC0003DMG400023817	Arginine-tRNA-protein transferase 1, eukaryotic||Acyl-CoA N-acyltransferase||Arginine-tRNA-protein transferase, N-terminal||Arginine-tRNA-protein transferase, C-terminal
PGSC0003DMG400023819	Cytochrome P450, E-class, group I||Cytochrome P450||Cytochrome P450, conserved site
PGSC0003DMG400023820	Complex 1 LYR protein||LYR motif-containing protein 2
PGSC0003DMG400023836	Putative methylase||S-adenosyl-L-methionine-dependent methyltransferase-like||DNA methylase, N-6 adenine-specific, conserved site
PGSC0003DMG400023852	Helix-loop-helix domain
PGSC0003DMG400023853	Major facilitator superfamily||Major facilitator superfamily domain||Major facilitator superfamily domain, general substrate transporter
PGSC0003DMG400023918	P-loop containing nucleoside triphosphate hydrolase||AAA+ ATPase domain||ABC transporter, conserved site||ABC transporter-like||ABC-2 type transporter
PGSC0003DMG400023935	Conserved gene of unknown function
PGSC0003DMG400023947	Endo beta n-acetylglucosaminidase
PGSC0003DMG400023975	Heme A synthase||Heme A synthase, type 2
PGSC0003DMG400024018	Protein kinase-like domain||Protein kinase, catalytic domain||Serine/threonine-protein kinase, active site||Serine-threonine/tyrosine-protein kinase catalytic domain||PAS domain||PAC motif
PGSC0003DMG400024046	Mitochondrial inner membrane translocase subunit Tim17/Tim22/Tim23/peroxisomal protein PMP24
PGSC0003DMG400024053	Peroxidases heam-ligand binding site||Haem peroxidase, plant/fungal/bacterial||Peroxidase, active site||Haem peroxidase||Plant peroxidase
PGSC0003DMG400024070	Conserved gene of unknown function
PGSC0003DMG400024073	Tyrosyl-DNA phosphodiesterase C-terminal domain||Tyrosyl-DNA phosphodiesterase||Forkhead-associated (FHA) domain||SMAD/FHA domain
PGSC0003DMG400024081	Oligopeptide transporter OPT superfamily
PGSC0003DMG400024089	Transcription factor IIS, N-terminal
PGSC0003DMG400024113	Gene of unknown function?
PGSC0003DMG400024139	Transferase||Chloramphenicol acetyltransferase-like domain
PGSC0003DMG400024167	Ankyrin repeat-containing domain||Ankyrin repeat
PGSC0003DMG400024185	Conserved gene of unknown function
PGSC0003DMG400024204	NUDIX hydrolase domain||NUDIX hydrolase domain-like
PGSC0003DMG400024209	Protein kinase, catalytic domain||UbiB domain||Protein kinase-like domain
PGSC0003DMG400024220	Pyruvate/Phosphoenolpyruvate kinase||Pyruvate kinase||Pyruvate kinase, active site||Pyruvate kinase, beta-barrel insert domain||Pyruvate kinase-like, insert domain||Pyruvate kinase, alpha/beta||Pyruvate kinase, C-terminal||Pyruvate kinase, barrel
PGSC0003DMG400024268	PTR2 family proton/oligopeptide symporter, conserved site||Major facilitator superfamily domain, general substrate transporter||Proton-dependent oligopeptide transporter family
PGSC0003DMG400024275	Pyridoxal phosphate-dependent transferase, major region, subdomain 2||Pyridoxal phosphate-dependent transferase, major domain||Pyridoxal phosphate-dependent transferase, major region, subdomain 1||Aminotransferase class-III
PGSC0003DMG400024322	SIT4 phosphatase-associated protein family
PGSC0003DMG400024342	Cytochrome P450, E-class, group I||Cytochrome P450||Cytochrome P450, conserved site
PGSC0003DMG400024357	Heat shock protein DnaJ, conserved site||Heat shock protein DnaJ, N-terminal
PGSC0003DMG400024409	Zinc/iron permease
PGSC0003DMG400024466	ABC transporter-like||ABC-2 type transporter||ABC transporter, conserved site||AAA+ ATPase domain||P-loop containing nucleoside triphosphate hydrolase
PGSC0003DMG400024475	Calmodulin binding protein-like
PGSC0003DMG400024485	Leucine-rich repeat||Protein kinase, catalytic domain||Protein kinase-like domain
PGSC0003DMG400024493	Seven-transmembrane-domain protein 1
PGSC0003DMG400024511	Centromere protein Mis12
PGSC0003DMG400024527	Transcription factor, SBP-box
PGSC0003DMG400024553	Conserved gene of unknown function
PGSC0003DMG400024575	Armadillo-like helical||HEAT, type 2||Armadillo-type fold
PGSC0003DMG400024584	Alpha-N-acetylglucosaminidase, C-terminal||Alpha-N-acetylglucosaminidase
PGSC0003DMG400024623	Glycosyl transferase, family 8||Nucleotide-diphospho-sugar transferases
PGSC0003DMG400024635	Conserved gene of unknown function
PGSC0003DMG400024796	Glycolipid transfer protein domain
PGSC0003DMG400024804	Alpha/Beta hydrolase fold||Peptidase S10, serine carboxypeptidase
PGSC0003DMG400024824	Glycosyl transferase, family 8||Nucleotide-diphospho-sugar transferases
PGSC0003DMG400024854	Gene of unknown function
PGSC0003DMG400024874	Cytochrome c oxidase biogenesis protein Cmc1-like
PGSC0003DMG400024878	SWIB/MDM2 domain||Plus-3
PGSC0003DMG400024881	SWIB/MDM2 domain||Plus-3
PGSC0003DMG400024889	Membrane attack complex component/perforin (MACPF) domain
PGSC0003DMG400024935	Ribosomal protein S5 domain 2-type fold, subgroup||Ribosomal protein S5 domain 2-type fold||DNA mismatch repair protein, C-terminal
PGSC0003DMG400024979	Conserved gene of unknown function
PGSC0003DMG400025007	Glucose/ribitol dehydrogenase||Short-chain dehydrogenase/reductase SDR||Light-dependent protochlorophyllide reductase||NAD(P)-binding domain
PGSC0003DMG400025013	KOW||Translation protein SH3-like, subgroup||Translation protein SH3-like||Ribosomal protein L24
PGSC0003DMG400025020	Helix-loop-helix domain
PGSC0003DMG400025021	Flavodoxin/nitric oxide synthase||Flavoprotein-like||NADPH-dependent FMN reductase||Flavoprotein WrbA
PGSC0003DMG400025036	PAP/25A-associated||Nucleotidyl transferase domain
PGSC0003DMG400025038	MTCP1||Cytochrome c oxidase copper chaperone
PGSC0003DMG400025040	Glycosyl transferase, family 14
PGSC0003DMG400025068	Chlorophyll a/b binding protein domain
PGSC0003DMG400025127	Zinc finger, DNL-type||SPX, N-terminal||EXS, C-terminal
PGSC0003DMG400025139	Glycosyl transferase, family 8||Nucleotide-diphospho-sugar transferases
PGSC0003DMG400025159	Cytochrome P450
PGSC0003DMG400025180	Multi antimicrobial extrusion protein
PGSC0003DMG400025182	ResB-like domain
PGSC0003DMG400025200	Gene of unknown function?
PGSC0003DMG400025208	Actin-binding FH2
PGSC0003DMG400025245	Heat shock protein DnaJ, conserved site||HSP40/DnaJ peptide-binding||Heat shock protein DnaJ, N-terminal||Heat shock protein DnaJ, cysteine-rich domain||Chaperone DnaJ||Chaperone DnaJ, C-terminal
PGSC0003DMG400025297	Spt4/RpoE2 zinc finger||RNA polymerase subunit RPABC4/transcription elongation factor Spt4||Transcription initiation Spt4-like||Transcription initiation Spt4
PGSC0003DMG400025298	Pyruvate kinase, barrel||Pyruvate kinase, C-terminal||Pyruvate kinase, alpha/beta||Pyruvate kinase-like, insert domain||Pyruvate kinase, active site||Pyruvate kinase, beta-barrel insert domain||Pyruvate kinase||Pyruvate/Phosphoenolpyruvate kinase
PGSC0003DMG400025309	GHMP kinase N-terminal domain||Ribosomal protein S5 domain 2-type fold, subgroup||Ribosomal protein S5 domain 2-type fold||GHMP kinase, ATP-binding, conserved site||Homoserine kinase||GHMP kinase, C-terminal domain
PGSC0003DMG400025348	Phosphoribosyltransferase C-terminal||C2 calcium-dependent membrane targeting
PGSC0003DMG400025349	ClpP||ClpP/TepA||ClpP/crotonase-like domain
PGSC0003DMG400025361	PAS-associated, C-terminal||Protein kinase, ATP binding site||PAC motif||Serine/threonine-protein kinase, active site||Protein kinase, catalytic domain||Serine/threonine- / dual-specificity protein kinase, catalytic domain||Protein kinase-like domain||PAS domain
PGSC0003DMG400025375	V-type proton ATPase subunit a||ATPase, V0/A0 complex subunit a
PGSC0003DMG400025385	Tetraspanin||Tetraspanin/Peripherin
PGSC0003DMG400025390	DNA-binding, integrase-type||AP2/ERF domain||-
PGSC0003DMG400025399	Vacuolar membrane protein pep3
PGSC0003DMG400025413	Conserved gene of unknown function
PGSC0003DMG400025433	Multi antimicrobial extrusion protein
PGSC0003DMG400025435	Protein kinase-like domain||Serine/threonine- / dual-specificity protein kinase, catalytic domain||Serine/threonine-protein kinase, active site||Protein kinase, catalytic domain||Calcium-binding EF-hand||EF-hand-like domain||Protein kinase, ATP binding site||EF-Hand 1, calcium-binding site
PGSC0003DMG400025436	eRF1 domain 3||eRF1 domain 2||Translation release factor pelota-like||50S ribosomal protein L30e-like||eRF1 domain 1/Pelota-like
PGSC0003DMG400025465	RNA polymerase sigma-70 region 3||RNA polymerase sigma-70 region 2||RNA polymerase sigma-70 factor||RNA polymerase sigma factor, region 2||RNA polymerase sigma factor, region 3/4||Winged helix-turn-helix transcription repressor DNA-binding||RNA polymerase sigma-70||RNA polymerase sigma-70 region 4
PGSC0003DMG400025479	DNA-binding, integrase-type||AP2/ERF domain
PGSC0003DMG400025495	Domain of unknown function DUF250||Tpt phosphate/phosphoenolpyruvate translocator||Drug/metabolite transporter
PGSC0003DMG400025500	Extracellular solute-binding protein, family 3||Ionotropic glutamate receptor, plant||Extracellular ligand-binding receptor||Ionotropic glutamate receptor||Periplasmic binding protein-like I||GPCR, family 3
PGSC0003DMG400025509	AGC-kinase, C-terminal||Serine/threonine-protein kinase, active site||Protein kinase, catalytic domain||Serine/threonine- / dual-specificity protein kinase, catalytic domain||Protein kinase-like domain||Pleckstrin homology-like domain||Protein kinase, C-terminal||Protein kinase, ATP binding site
PGSC0003DMG400025519	Early flowering 3
PGSC0003DMG400025532	UDP-glucuronosyl/UDP-glucosyltransferase
PGSC0003DMG400025543	Gene of unknown function
PGSC0003DMG400025621	NDR1
PGSC0003DMG400025626	Drought induced 19/ RING finger protein 114||Protein dehydration-induced 19, C-terminal
PGSC0003DMG400025645	Protein of unknown function DUF543
PGSC0003DMG400025692	ACT domain
PGSC0003DMG400025700	Small-subunit processome, Utp12||WD40/YVTN repeat-like-containing domain||Quinonprotein alcohol dehydrogenase-like||WD40-repeat-containing domain||G-protein beta WD-40 repeat||WD40 repeat, conserved site||WD40 repeat
PGSC0003DMG400025725	Protein of unknown function DUF620
PGSC0003DMG400025766	Pseudouridine synthase, catalytic domain||Pseudouridine synthase, RsuA/RluB/C/D/E/F
PGSC0003DMG400025778	Protein of unknown function DUF869, plant
PGSC0003DMG400025794	Pentatricopeptide repeat
PGSC0003DMG400025796	TRAM/LAG1/CLN8 homology domain||Longevity assurance, LAG1/LAC1
PGSC0003DMG400025861	Aminoglycoside phosphotransferase||Protein kinase-like domain||Methylthioribose kinase
PGSC0003DMG400025928	Gene of unknown function
PGSC0003DMG400025967	Pectinesterase, catalytic||Pectin lyase fold||Pectinesterase inhibitor||Pectin lyase fold/virulence factor||Pectinesterase, active site
PGSC0003DMG400025968	Golgi SNAP receptor complex, subunit 1
PGSC0003DMG400025969	YABBY protein||High mobility group, superfamily
PGSC0003DMG400025975	YqgF/RNase H-like domain||Resolvase, holliday junction-type, YqgF-like||Ribonuclease H-like domain
PGSC0003DMG400025982	Lecithin:cholesterol/phospholipid:diacylglycerol acyltransferase||Alpha/Beta hydrolase fold
PGSC0003DMG400025997	Lipase, class 3||Alpha/Beta hydrolase fold
PGSC0003DMG400026014	Phosphatidate cytidylyltransferase
PGSC0003DMG400026019	Zinc finger, C2H2-like||Zinc finger, U1-type
PGSC0003DMG400026026	GroEL-like apical domain||Chaperonin Cpn60/TCP-1||Chaperonin TCP-1, conserved site||TCP-1-like chaperonin intermediate domain||Chaperone, tailless complex polypeptide 1||GroEL-like equatorial domain
PGSC0003DMG400026042	ARP2/3 complex 16kDa subunit (p16-Arc)
PGSC0003DMG400026079	No apical meristem (NAM) protein
PGSC0003DMG400026112	Protease-associated domain, PA||Zinc finger, RING/FYVE/PHD-type||Zinc finger, RING-type
PGSC0003DMG400026114	SNARE associated Golgi protein
PGSC0003DMG400026120	Protein-tyrosine phosphatase-like||Protein-tyrosine phosphatase, active site||Protein-tyrosine phosphatase, receptor/non-receptor type||Protein-tyrosine/Dual-specificity phosphatase
PGSC0003DMG400026134	Zinc finger, PHD-type, conserved site||Zinc finger, PHD-type||Zinc finger, RING/FYVE/PHD-type||Zinc finger, FYVE/PHD-type
PGSC0003DMG400026232	DNA-binding, integrase-type||AP2/ERF domain
PGSC0003DMG400026233	Nudix hydrolase 6-like||NUDIX hydrolase domain-like||NUDIX hydrolase, conserved site||NUDIX hydrolase domain
PGSC0003DMG400026236	Alpha/Beta hydrolase fold||Palmitoyl protein thioesterase
PGSC0003DMG400026258	Zinc finger, PHD-finger||Zinc finger, PHD-type||Oxoglutarate/iron-dependent dioxygenase||Zinc finger, RING/FYVE/PHD-type||Zinc finger, FYVE/PHD-type||Acyl-CoA N-acyltransferase||Zinc finger, PHD-type, conserved site||Isopenicillin N synthase-like||GNAT domain
PGSC0003DMG400026279	Terpene synthase, metal-binding domain||Terpenoid synthase
PGSC0003DMG400026282	Thioredoxin-like fold
PGSC0003DMG400026299	YbaB-like DNA-binding protein
PGSC0003DMG400026303	Biopterin transport-related protein BT1||Major facilitator superfamily domain, general substrate transporter
PGSC0003DMG400026308	3-Oxoacyl-[acyl-carrier-protein (ACP)] synthase III C-terminal||Thiolase-like, subgroup||Thiolase-like||Beta-ketoacyl-acyl carrier protein synthase III (FabH)||3-Oxoacyl-[acyl-carrier-protein (ACP)] synthase III
PGSC0003DMG400026312	Periplasmic binding protein-like I||Extracellular solute-binding protein, family 3||Extracellular ligand-binding receptor||Ionotropic glutamate receptor, plant||Ionotropic glutamate receptor
PGSC0003DMG400026325	Serine/threonine-protein kinase, active site||Protein kinase, catalytic domain||Concanavalin A-like lectin/glucanase, subgroup||Malectin-like carbohydrate-binding domain||Protein kinase-like domain||Protein kinase, ATP binding site||Serine-threonine/tyrosine-protein kinase catalytic domain
PGSC0003DMG400026333	RmlC-like cupin domain||Cupin 1||Germin||RmlC-like jelly roll fold
PGSC0003DMG400026342	Ubiquinol-cytochrome C reductase, UQCRX/QCR9-like
PGSC0003DMG400026359	Glycoside hydrolase, family 17||Glycoside hydrolase, superfamily||Glycoside hydrolase, catalytic domain
PGSC0003DMG400026420	Methyltransferase type 11||S-adenosyl-L-methionine-dependent methyltransferase-like||Spermidine/spermine synthases family
PGSC0003DMG400026426	UV radiation resistance protein/autophagy-related protein 14
PGSC0003DMG400026427	Ceramidase
PGSC0003DMG400026428	Sucrose-phosphate synthase||Glycosyl transferase, family 1||Glycosyltransferase subfamily 4, N-terminal domain||Sucrose phosphate synthase, plant
PGSC0003DMG400026430	Galactose-binding domain-like||Glycoside hydrolase, family 35, conserved site||Glycoside hydrolase, family 35||D-galactoside/L-rhamnose binding SUEL lectin domain||Glycoside hydrolase, catalytic domain||Glycoside hydrolase, superfamily
PGSC0003DMG400026453	CHCH
PGSC0003DMG400026456	Malic enzyme, N-terminal||Malic enzyme, NAD-binding||Malic enzyme, conserved site||NAD(P)-binding domain||Malic oxidoreductase
PGSC0003DMG400026470	PfkB||Ribokinase||Ribokinase-like||Carbohydrate/puine kinase, PfkB, conserved site
PGSC0003DMG400026508	ATPase, F1 complex, epsilon subunit, mitochondrial
PGSC0003DMG400026523	Nucleotide-diphospho-sugar transferases
PGSC0003DMG400026526	Syntaxin/epimorphin, conserved site||Syntaxin, N-terminal||Target SNARE coiled-coil domain||t-SNARE
PGSC0003DMG400026530	Six-hairpin glycosidase-like||Glycosyl hydrolase family 100
PGSC0003DMG400026534	MORN motif
PGSC0003DMG400026538	Conserved gene of unknown function?
PGSC0003DMG400026540	Stress responsive alpha-beta barrel||Dimeric alpha-beta barrel
PGSC0003DMG400026543	ABC-transporter extracellular N-terminal domain||Plant PDR ABC transporter associated||P-loop containing nucleoside triphosphate hydrolase||ABC transporter-like||ABC-2 type transporter||AAA+ ATPase domain
PGSC0003DMG400026552	NLI interacting factor||HAD-like domain
PGSC0003DMG400026572	Saposin-like type B, 1||Saposin-like||Saposin||Saposin B
PGSC0003DMG400026601	Alpha-ketoglutarate-dependent dioxygenase AlkB-like
PGSC0003DMG400026621	IQ motif, EF-hand binding site
PGSC0003DMG400026627	Magnesium chelatase, ATPase subunit I||P-loop containing nucleoside triphosphate hydrolase||Magnesium chelatase, ChlI subunit||AAA+ ATPase domain
PGSC0003DMG400026653	Mog1/PsbP, alpha/beta/alpha sandwich
PGSC0003DMG400026685	Cyclin, N-terminal||Cyclin, C-terminal||Cyclin-like
PGSC0003DMG400026686	Cyclin-like||Cyclin, N-terminal
PGSC0003DMG400026732	Double Clp-N motif||Chaperonin ClpA/B||ATPase, AAA-type, core||P-loop containing nucleoside triphosphate hydrolase
PGSC0003DMG400026736	Transcription factor, SBP-box
PGSC0003DMG400026750	Leucine-rich repeat
PGSC0003DMG400026758	Homeodomain-like||Myb-like domain||Myb domain||SANT/Myb domain
PGSC0003DMG400026759	Cullin repeat-like-containing domain||Conserved oligomeric Golgi complex, subunit 3
PGSC0003DMG400026760	Serine-threonine/tyrosine-protein kinase catalytic domain||Leucine-rich repeat||Protein kinase-like domain||Leucine rich repeats (2 copies)||Protein kinase, catalytic domain||Leucine-rich repeat-containing N-terminal, type 2
PGSC0003DMG400026784	Inorganic pyrophosphatase
PGSC0003DMG400026829	Translation elongation factor, IF5A C-terminal||Nucleic acid-binding, OB-fold||Translation protein SH3-like||Translation elongation factor, IF5A, hypusine site||Translation elongation factor IF5A||Translation protein SH3-like, subgroup
PGSC0003DMG400026833	Mitochondrial carrier domain||Mitochondrial substrate/solute carrier||Mitochondrial carrier protein
PGSC0003DMG400026858	Phosphoinositide-binding clathrin adaptor, N-terminal?
PGSC0003DMG400026862	RNA recognition motif domain||Nucleotide-binding, alpha-beta plait
PGSC0003DMG400026867	Serine-threonine/tyrosine-protein kinase catalytic domain||Protein kinase, catalytic domain||Serine/threonine-protein kinase, active site||Protein kinase, ATP binding site||Protein kinase-like domain
PGSC0003DMG400026871	Cytochrome P450, conserved site||Cytochrome P450||Cytochrome P450, E-class, group I
PGSC0003DMG400026883	Gene of unknown function
PGSC0003DMG400026912	Protein of unknown function DUF846, eukaryotic
PGSC0003DMG400026916	Ribokinase-like||Carbohydrate/puine kinase, PfkB, conserved site||Ribokinase||PfkB
PGSC0003DMG400026943	Thiamin diphosphate-binding fold||Transketolase, C-terminal||Pyruvate dehydrogenase E1 component subunit beta||Transketolase-like, pyrimidine-binding domain||Transketolase, C-terminal/Pyruvate-ferredoxin oxidoreductase, domain II
PGSC0003DMG400026956	Endonuclease/exonuclease/phosphatase||Inositol polyphosphate-related phosphatase
PGSC0003DMG400026983	Ribosomal protein L22/L17, eukaryotic/archaeal||Ribosomal protein L22/L17||Ribosomal protein L22/L17, conserved site
PGSC0003DMG400026989	Histone deacetylase domain||Histone deacetylase superfamily||Histone deacetylase
PGSC0003DMG400027069	Tetratricopeptide TPR2||Tetratricopeptide repeat||Tetratricopeptide repeat-containing domain||Tetratricopeptide-like helical||Tetratricopeptide TPR-1
PGSC0003DMG400027070	Parallel beta-helix repeat||Pectin lyase fold/virulence factor||Pectin lyase fold||Pectate lyase/Amb allergen||AmbAllergen
PGSC0003DMG400027072	Drought induced 19/ RING finger protein 114||Protein dehydration-induced 19, C-terminal
PGSC0003DMG400027099	Anaphase-promoting complex subunit 11||Zinc finger, RING/FYVE/PHD-type||Zinc finger, RING-type
PGSC0003DMG400027140	Legume lectin domain||Concanavalin A-like lectin/glucanases superfamily||Serine/threonine-protein kinase, active site||Protein kinase, catalytic domain||Concanavalin A-like lectin/glucanase, subgroup||Protein kinase-like domain||Protein kinase, ATP binding site
PGSC0003DMG400027147	Conserved gene of unknown function
PGSC0003DMG400027151	Transcription factor, SBP-box||Ankyrin repeat-containing domain
PGSC0003DMG400027154	Galectin, carbohydrate recognition domain||Glycosyl transferase, family 31||Concanavalin A-like lectin/glucanases superfamily||Concanavalin A-like lectin/glucanase, subgroup
PGSC0003DMG400027155	Protein phosphatase 2C-like||Protein phosphatase 2C, manganese/magnesium aspartate binding site||Protein phosphatase 2C
PGSC0003DMG400027171	Autophagy-related protein 27
PGSC0003DMG400027188	Amino acid transporter, transmembrane
PGSC0003DMG400027239	Glycoside hydrolase, family 28||Pectin lyase fold||Pectin lyase fold/virulence factor||Parallel beta-helix repeat
PGSC0003DMG400027240	Glycoside hydrolase family 3||Glycoside hydrolase, family 3, N-terminal||Glycoside hydrolase family 3 C-terminal domain||Glycoside hydrolase, superfamily
PGSC0003DMG400027265	Phosphopantetheine attachment site||Acyl carrier protein (ACP)||Acyl carrier protein-like
PGSC0003DMG400027268	Translation elongation factor EFTu/EF1A, domain 2||Translation elongation/initiation factor/Ribosomal, beta-barrel||GTP-binding protein LepA, C-terminal||Small GTP-binding protein domain||Elongation factor G/III/V||Translation factor GUF1 homologue, organellar chromatophore||Elongation factor 4||Translation elongation factor EFG/EF2, C-terminal||Protein synthesis factor, GTP-binding||P-loop conta…
PGSC0003DMG400027275	SANT associated
PGSC0003DMG400027276	Magnesium chelatase, subunit H, N-terminal||CobN/magnesium chelatase||Magnesium-chelatase, subunit H
PGSC0003DMG400027289	UDP-glucuronosyl/UDP-glucosyltransferase
PGSC0003DMG400027325	Leucine-rich repeat||NB-ARC||P-loop containing nucleoside triphosphate hydrolase
PGSC0003DMG400027335	K Homology domain||K Homology domain, type 1
PGSC0003DMG400027354	Nucleoside phosphorylase||Nucleoside phosphorylase domain
PGSC0003DMG400027390	Transcription factor CBF/NF-Y/archaeal histone||Histone-fold
PGSC0003DMG400027412	Band 7 protein||Stomatin
PGSC0003DMG400027418	Myb domain||SANT/Myb domain||Homeodomain-like
PGSC0003DMG400027434	RNA-binding, CRM domain
PGSC0003DMG400027448	Conserved gene of unknown function
PGSC0003DMG400027450	Cyclic nucleotide-binding-like||Ion transport domain||RmlC-like jelly roll fold||Cyclic nucleotide-binding domain
PGSC0003DMG400027463	Chloramphenicol acetyltransferase-like domain||Transferase
PGSC0003DMG400027497	Alpha crystallin/Hsp20 domain||HSP20-like chaperone
PGSC0003DMG400027502	DNA-binding, integrase-type||AP2/ERF domain
PGSC0003DMG400027522	WD40 repeat||WD40 repeat, conserved site||WD40-repeat-containing domain||WD40/YVTN repeat-like-containing domain
PGSC0003DMG400027544	Transport protein particle (TRAPP) component||NO signalling/Golgi transport ligand-binding domain
PGSC0003DMG400027600	Lipase, GDSL||Esterase, SGNH hydrolase-type, subgroup
PGSC0003DMG400027609	Thioredoxin-like fold||Thioredoxin, conserved site||Thioredoxin domain
PGSC0003DMG400027635	Peptidase C19, ubiquitin carboxyl-terminal hydrolase 2, conserved site||Ubiquitin carboxyl-terminal hydrolase-like domain||Peptidase C19, ubiquitin carboxyl-terminal hydrolase 2
PGSC0003DMG400027650	Nucleotide-binding, alpha-beta plait||RNA recognition motif domain||Ataxin-2, C-terminal
PGSC0003DMG400027670	Frigida-like
PGSC0003DMG400027682	Ribonuclease T2-like
PGSC0003DMG400027697	Conserved gene of unknown function
PGSC0003DMG400027701	Conserved gene of unknown function
PGSC0003DMG400027708	Gene of unknown function
PGSC0003DMG400027747	Protein of unknown function DUF4516
PGSC0003DMG400027760	Gene of unknown function
PGSC0003DMG400027776	F-box family protein?
PGSC0003DMG400027786	-||SNF5/SMARCB1/INI1
PGSC0003DMG400027813	Conserved gene of unknown function
PGSC0003DMG400027837	Gene of unknown function
PGSC0003DMG400027846	Initiation factor eIF-4 gamma, MA3||MIF4G-like, type 3||Armadillo-type fold||MIF4-like, type 1/2/3
PGSC0003DMG400027848	Ubiquitin-conjugating enzyme, E2||Ubiquitin-conjugating enzyme/RWD-like||Ubiquitin-conjugating enzyme, active site
PGSC0003DMG400027857	DNA glycosylase||Methyladenine glycosylase
PGSC0003DMG400027858	Domain of unknown function DUF862, eukaryotic
PGSC0003DMG400027872	Mediator complex, subunit Med20
PGSC0003DMG400027873	Dihydrolipoamide succinyltransferase||2-oxo acid dehydrogenase, lipoyl-binding site||Single hybrid motif||Chloramphenicol acetyltransferase-like domain||Biotin/lipoyl attachment||2-oxoacid dehydrogenase acyltransferase, catalytic domain
PGSC0003DMG400027904	AP2/ERF domain||DNA-binding, integrase-type
PGSC0003DMG400027905	Serine/threonine-protein kinase, active site||Protein kinase, catalytic domain||Protein kinase-like domain||Concanavalin A-like lectin/glucanase, subgroup||Protein kinase, ATP binding site
PGSC0003DMG400027914	Multicopper oxidase, type 3||Cupredoxin||Multicopper oxidase, copper-binding site||Multicopper oxidase, type 1||L-ascorbate oxidase, plants||Multicopper oxidase, type 2
PGSC0003DMG400027948	Cyd operon protein YbgE||Domain of unknown function DUF125, transmembrane
PGSC0003DMG400027950	Nucleotide-diphospho-sugar transferases||Glycosyl transferase, family 8
PGSC0003DMG400027954	ATPase, V0/A0 complex subunit a||V-type proton ATPase subunit a
PGSC0003DMG400027997	Conserved gene of unknown function
PGSC0003DMG400028031	Domain of unknown function DUF250
PGSC0003DMG400028061	PTAC6
PGSC0003DMG400028065	Protein of unknown function DUF1421
PGSC0003DMG400028067	Gene of unknown function?
PGSC0003DMG400028110	Ubiquitin-conjugating enzyme, E2||Ubiquitin-conjugating enzyme/RWD-like||Ubiquitin-conjugating enzyme, active site
PGSC0003DMG400028117	Multi antimicrobial extrusion protein
PGSC0003DMG400028119	Homeodomain-like||SANT/Myb domain||Myb domain
PGSC0003DMG400028121	Basic-leucine zipper domain
PGSC0003DMG400028123	Uncharacterised protein family Cys-rich
PGSC0003DMG400028124	Alpha/beta hydrolase fold-1||Alpha/Beta hydrolase fold
PGSC0003DMG400028125	Homeodomain-like||SANT/Myb domain||Myb domain
PGSC0003DMG400028136	Zinc finger, RING-type||Zinc finger, RING/FYVE/PHD-type
PGSC0003DMG400028137	FAS1 domain
PGSC0003DMG400028143	Winged helix-turn-helix transcription repressor DNA-binding||Nucleic acid-binding, OB-fold||Nucleic acid binding, OB-fold, tRNA/helicase-type||Replication protein A, C-terminal||Replication protein A, subunit RPA32
PGSC0003DMG400028154	Cytokinin riboside 5'-monophosphate phosphoribohydrolase LOG
PGSC0003DMG400028169	Protein kinase-like domain||Serine/threonine- / dual-specificity protein kinase, catalytic domain||Serine/threonine-protein kinase, active site||Protein kinase, catalytic domain
PGSC0003DMG400028172	SANT/Myb domain||Myb-like domain
PGSC0003DMG400028191	Auxin efflux carrier, plant type||Auxin efflux carrier
PGSC0003DMG400028196	RING zinc finger protein
PGSC0003DMG400028200	Zinc finger, RING-type||Zinc finger, RING/FYVE/PHD-type
PGSC0003DMG400028212	Protein kinase, catalytic domain||Protein kinase-like domain||Concanavalin A-like lectin/glucanase, subgroup||Leucine-rich repeat||Serine-threonine/tyrosine-protein kinase catalytic domain
PGSC0003DMG400028214	Oxidoreductase, FAD-binding domain||Flavoprotein pyridine nucleotide cytochrome reductase||NADH:cytochrome b5 reductase (CBR)||Oxidoreductase FAD/NAD(P)-binding||Ferredoxin reductase-type FAD-binding domain||Riboflavin synthase-like beta-barrel
PGSC0003DMG400028223	Peptidase C19, ubiquitin carboxyl-terminal hydrolase 2, conserved site||Ubiquitin carboxyl-terminal hydrolase-like domain||Peptidase C19, ubiquitin carboxyl-terminal hydrolase 2||MATH||Peptidase C19 domain||Ubiquitin carboxyl-terminal hydrolase, C-terminal||TRAF-like
PGSC0003DMG400028228	TPX2, C-terminal domain
PGSC0003DMG400028231	START-like domain
PGSC0003DMG400028233	Glycosyl transferase, family 1
PGSC0003DMG400028234	Clathrin/coatomer adaptor, adaptin-like, N-terminal||Armadillo-like helical||Coatomer beta subunit||Coatomer beta subunit, appendage platform domain||Armadillo-type fold||Coatomer, beta subunit, C-terminal
PGSC0003DMG400028259	Glutamine-Leucine-Glutamine, QLQ||WRC
PGSC0003DMG400028267	Nucleotide-diphospho-sugar transferases
PGSC0003DMG400028276	Glutamine synthetase, catalytic domain||Glutamine synthetase/guanido kinase, catalytic domain
PGSC0003DMG400028280	Ankyrin repeat||Ankyrin repeat-containing domain
PGSC0003DMG400028305	Cytochrome P450, E-class, group I||Cytochrome P450||Cytochrome P450, conserved site||Heat shock protein DnaJ, N-terminal
PGSC0003DMG400028308	Transcription factor, SBP-box
PGSC0003DMG400028316	Magnesium transporter MRS2/LPE10||Mg2+ transporter protein, CorA-like/Zinc transport protein ZntB
PGSC0003DMG400028324	Target SNARE coiled-coil domain
PGSC0003DMG400028325	Glycoside hydrolase, superfamily||Glycoside hydrolase, family 79||Remorin, C-terminal
PGSC0003DMG400028326	Ankyrin repeat-containing domain||Ankyrin repeat
PGSC0003DMG400028358	Transcription factor, K-box||Transcription factor, MADS-box
PGSC0003DMG400028369	Nuclear transport factor 2||Nuclear transport factor 2, Eukaryote
PGSC0003DMG400028381	DNA-binding WRKY||-
PGSC0003DMG400028423	Protein of unknown function DUF1685
PGSC0003DMG400028435	Protein kinase, ATP binding site||Protein kinase-like domain||Concanavalin A-like lectin/glucanase, subgroup||Serine/threonine-protein kinase, active site||Protein kinase, catalytic domain||Serine-threonine/tyrosine-protein kinase catalytic domain||Leucine-rich repeat
PGSC0003DMG400028467	HAD-like domain||Glycosyl transferase, family 20||Trehalose-phosphatase||HAD-superfamily hydrolase, subfamily IIB
PGSC0003DMG400028499	Domain of unknown function DUF862, eukaryotic
PGSC0003DMG400028514	Zinc finger, RING/FYVE/PHD-type||Protein of unknown function DUF1644
PGSC0003DMG400028555	Gene of unknown function
PGSC0003DMG400028599	Glutathione synthase, N-terminal, eukaryotic||Glutathione synthase domain||Glutathione synthase, alpha-helical, eukaryotic||Glutathione synthase, substrate-binding, eukaryotic||Glutathione synthase, eukaryotic||ATP-grasp fold, subdomain 2||Pre-ATP-grasp fold
PGSC0003DMG400028637	Isopenicillin N synthase-like||Non-haem dioxygenase N-terminal domain||Oxoglutarate/iron-dependent dioxygenase
PGSC0003DMG400028656	Zinc finger, PHD-type, conserved site||Zinc finger, PHD-type||SET domain||Zinc finger, RING/FYVE/PHD-type||Zinc finger, FYVE/PHD-type||Zinc finger, PHD-finger
PGSC0003DMG400028694	GAF domain-like||Signal transduction histidine kinase, core||CheY-like superfamily||Signal transduction histidine kinase, homodimeric||Signal transduction histidine kinase, subgroup 1, dimerisation/phosphoacceptor domain||ATPase-like, ATP-binding domain||Signal transduction response regulator, receiver domain||Signal transduction histidine kinase, hybrid-type, ethylene sensor||GAF domain
PGSC0003DMG400028781	Ribosomal protein S7e
PGSC0003DMG400028783	Glutathione S-transferase, N-terminal||Glutathione S-transferase, C-terminal||Glutathione S-transferase, C-terminal-like||Thioredoxin-like fold
PGSC0003DMG400028791	Conserved gene of unknown function
PGSC0003DMG400028801	Leucine-rich repeat||Protein kinase-like domain||Protein kinase, ATP binding site||Protein kinase, catalytic domain||Leucine-rich repeat-containing N-terminal, type 2
PGSC0003DMG400028815	Reticulon
PGSC0003DMG400028820	RNA recognition motif domain||Nucleotide-binding, alpha-beta plait
PGSC0003DMG400028823	Sterile alpha motif, type 2||Sterile alpha motif domain||Sterile alpha motif/pointed domain
PGSC0003DMG400028845	Concanavalin A-like lectin/glucanase, subgroup||Leucine rich repeats (2 copies)||Protein kinase-like domain||Protein kinase, catalytic domain||Leucine-rich repeat-containing N-terminal, type 2||Serine-threonine/tyrosine-protein kinase catalytic domain||Leucine-rich repeat
PGSC0003DMG400028854	Esterase, SGNH hydrolase-type, subgroup||Lipase, GDSL
PGSC0003DMG400028857	Protein of unknown function DUF936, plant
PGSC0003DMG400028958	Multicopper oxidase, type 3||Cupredoxin||Multicopper oxidase, type 1||Multicopper oxidase, type 2
PGSC0003DMG400028961	Glycosyl transferase, family 31||Domain of unknown function DUF4094
PGSC0003DMG400028982	Citrate synthase active site||Citrate synthase-like, core||Citrate synthase-like, large alpha subdomain||Citrate synthase, eukaryotic||Citrate synthase-like
PGSC0003DMG400028992	P-loop containing nucleoside triphosphate hydrolase||Adenylate kinase||Adenylate kinase, subfamily
PGSC0003DMG400028995	Protein kinase-like domain||Protein kinase, catalytic domain
PGSC0003DMG400029005	Terpenoid synthase||Squalene/phytoene synthase
PGSC0003DMG400029010	Conserved gene of unknown function
PGSC0003DMG400029024	Zinc finger, C2H2||Poly(ADP-ribose) polymerase, catalytic domain||Zinc finger, C2H2-like
PGSC0003DMG400029030	Pleckstrin homology-like domain||Oxysterol-binding protein||Pleckstrin homology domain
PGSC0003DMG400029059	Poly(A) polymerase, RNA-binding domain||Nucleotidyltransferase, class I, C-terminal-like||Poly(A) polymerase, central domain||Poly(A) polymerase
PGSC0003DMG400029061	Cas1p 10 TM acyl transferase domain
PGSC0003DMG400029085	Nucleoside phosphorylase domain||Nucleoside phosphorylase
PGSC0003DMG400029089	Domain of unknown function DUF250
PGSC0003DMG400029109	Cytochrome P450||Cytochrome P450, E-class, group I||Cytochrome P450, conserved site
PGSC0003DMG400029110	Microtubule-associated protein, MAP65/ASE1-type
PGSC0003DMG400029157	ABC transporter, transmembrane domain||AAA+ ATPase domain||ABC transporter, conserved site||ABC transporter-like||P-loop containing nucleoside triphosphate hydrolase||ABC transporter, transmembrane domain, type 1
PGSC0003DMG400029158	Peptidase S10, serine carboxypeptidase||Alpha/Beta hydrolase fold||Peptidase S10, serine carboxypeptidase, active site
PGSC0003DMG400029159	Conserved gene of unknown function
PGSC0003DMG400029178	Pentatricopeptide repeat
PGSC0003DMG400029200	Terpenoid synthase||Terpene synthase, metal-binding domain
PGSC0003DMG400029247	Acyl transferase/acyl hydrolase/lysophospholipase
PGSC0003DMG400029273	6,7-dimethyl-8-ribityllumazine synthase
PGSC0003DMG400029284	Endonuclease V
PGSC0003DMG400029285	Chloramphenicol acetyltransferase-like domain||G-protein gamma-like domain||Transferase
PGSC0003DMG400029287	Uncharacterised protein family UPF0114
PGSC0003DMG400029298	UspA||Protein kinase, catalytic domain||Serine/threonine-protein kinase, active site||Rossmann-like alpha/beta/alpha sandwich fold||Protein kinase-like domain||Concanavalin A-like lectin/glucanase, subgroup
PGSC0003DMG400029324	Conserved gene of unknown function
PGSC0003DMG400029329	Thioredoxin-like fold
PGSC0003DMG400029335	C2 calcium-dependent membrane targeting
PGSC0003DMG400029342	WD40 repeat||Pre-mRNA-splicing factor 19||WD40-repeat-containing domain||WD40/YVTN repeat-like-containing domain||Zinc finger, RING/FYVE/PHD-type
PGSC0003DMG400029361	Poly(ADP-ribose) glycohydrolase
PGSC0003DMG400029368	Glycosyl transferase, family 31
PGSC0003DMG400029391	Poly(A) polymerase||Poly(A) polymerase, central domain||Nucleotidyltransferase, class I, C-terminal-like||Nucleotidyl transferase domain||Poly(A) polymerase, RNA-binding domain
PGSC0003DMG400029392	Protein kinase-like domain||Protein kinase, ATP binding site||Serine/threonine- / dual-specificity protein kinase, catalytic domain||Protein kinase, catalytic domain||Serine/threonine-protein kinase, active site
PGSC0003DMG400029400	Proteinase inhibitor I29, cathepsin propeptide||Peptidase C1A, papain C-terminal||Peptidase C1A, papain||Cysteine peptidase, asparagine active site||Cysteine peptidase, histidine active site||Cysteine peptidase, cysteine active site
PGSC0003DMG400029403	Domain of unknown function DUF23
PGSC0003DMG400029405	NB-ARC||P-loop containing nucleoside triphosphate hydrolase
PGSC0003DMG400029406	Glyceraldehyde-3-phosphate dehydrogenase, type I||Glyceraldehyde/Erythrose phosphate dehydrogenase family||Domain of unknown function CP12||NAD(P)-binding domain||Glyceraldehyde 3-phosphate dehydrogenase, active site||Glyceraldehyde 3-phosphate dehydrogenase, catalytic domain||Glyceraldehyde 3-phosphate dehydrogenase, NAD(P) binding domain
PGSC0003DMG400029409	Armadillo-type fold||Zinc finger, RING/FYVE/PHD-type||Armadillo||U box domain||Armadillo-like helical
PGSC0003DMG400029411	Conserved gene of unknown function?
PGSC0003DMG400029418	Major facilitator superfamily||Major facilitator superfamily domain||Tetracycline resistance protein, TetA/multidrug resistance protein MdtG||Major facilitator superfamily domain, general substrate transporter
PGSC0003DMG400029420	Esterase, SGNH hydrolase-type, subgroup||Lipase, GDSL
PGSC0003DMG400029442	Protein kinase, ATP binding site||Concanavalin A-like lectin/glucanase, subgroup||Protein kinase-like domain||Serine/threonine-protein kinase, active site||Leucine-rich repeat-containing N-terminal, type 2||Protein kinase, catalytic domain||Leucine-rich repeat
PGSC0003DMG400029502	Protein of unknown function DUF1423, plant
PGSC0003DMG400029514	Myb domain||SANT/Myb domain||Homeodomain-like||Response regulator, plant B-type||CheY-like superfamily||Signal transduction response regulator, receiver domain||Myb domain, plants
PGSC0003DMG400029524	Bet v I domain||START-like domain||Major latex protein domain
PGSC0003DMG400029537	Gene of unknown function
PGSC0003DMG400029542	Signal transduction histidine kinase, homodimeric||Signal transduction histidine kinase, core||CheY-like superfamily||Signal transduction response regulator, receiver domain||Signal transduction histidine kinase-related protein, C-terminal||Signal transduction histidine kinase, subgroup 1, dimerisation/phosphoacceptor domain||ATPase-like, ATP-binding domain
PGSC0003DMG400029553	Myb-like domain
PGSC0003DMG400029561	Ribosomal protein S6, eukaryotic||Ribosomal protein S6e||Ribosomal protein S6e, conserved site
PGSC0003DMG400029564	Protein of unknown function DUF1218
PGSC0003DMG400029627	DNA/RNA-binding protein Alba-like
PGSC0003DMG400029634	Helix-loop-helix domain
PGSC0003DMG400029652	Aminoglycoside phosphotransferase||Protein kinase-like domain||UbiB domain
PGSC0003DMG400029654	Galactose oxidase/kelch, beta-propeller||F-box associated interaction domain||F-box domain, cyclin-like||F-box associated domain, type 1
PGSC0003DMG400029712	Malectin-like carbohydrate-binding domain||Leucine rich repeats (2 copies)||Leucine-rich repeat
PGSC0003DMG400029724	Ubiquitin-conjugating enzyme, E2||Ubiquitin-conjugating enzyme/RWD-like
PGSC0003DMG400029748	Drug/metabolite transporter
PGSC0003DMG400029777	Late embryogenesis abundant protein, LEA-14
PGSC0003DMG400029793	Nin one binding (NOB1) Zn-ribbon-like||D-site 20S pre-rRNA nuclease
PGSC0003DMG400029820	Conserved gene of unknown function
PGSC0003DMG400029827	Gene of unknown function
PGSC0003DMG400029834	BTB/POZ fold||BTB/POZ||Ankyrin repeat||Domain of unknown function DUF3420||Ankyrin repeat-containing domain||BTB/POZ-like
PGSC0003DMG400029837	Peptidase M20||Peptidase M20, dimerisation||Amidohydrolase
PGSC0003DMG400029844	Domain of unknown function DUF250
PGSC0003DMG400029848	Ataxin-2, C-terminal
PGSC0003DMG400029856	HAD-like domain||HAD-superfamily hydrolase, subfamily IA, variant 1||HAD-superfamily hydrolase, subfamily IA, REG-2-like
PGSC0003DMG400029865	Nucleic acid-binding, OB-fold||Replication factor A, C-terminal||ACT domain
PGSC0003DMG400029866	Amino acid transporter, transmembrane
PGSC0003DMG400029872	Pyridoxal phosphate-dependent transferase, major domain||Pyridoxal phosphate-dependent transferase, major region, subdomain 2||Ornithine aminotransferase||Pyridoxal phosphate-dependent transferase, major region, subdomain 1||Aminotransferase class-III
PGSC0003DMG400029873	-||Peptidase cysteine/serine, trypsin-like||Peptidase S1C, HrtA/DegP2/Q/S
PGSC0003DMG400029944	Histone deacetylase superfamily||Histone deacetylase domain
PGSC0003DMG400029964	Phospholipase A2||Phospholipase A2, eukaryotic||-||Phospholipase A2, active site
PGSC0003DMG400029983	Conserved gene of unknown function
PGSC0003DMG400029988	Glycoside hydrolase, catalytic domain||Glycoside hydrolase, superfamily||Glycoside hydrolase, family 17
PGSC0003DMG400030001	LRX1
PGSC0003DMG400030005	Poly A polymerase, head domain
PGSC0003DMG400030059	Zinc finger, RING/FYVE/PHD-type||Zinc finger, RING-type||Nucleotide-binding, alpha-beta plait||RNA recognition motif domain
PGSC0003DMG400030080	CRAL-TRIO domain||CRAL/TRIO, N-terminal domain
PGSC0003DMG400030092	Dual specificity phosphatase, catalytic domain||Immunoglobulin E-set||Protein-tyrosine phosphatase-like||Dual specificity phosphatase, subgroup, catalytic domain||PDZ domain
PGSC0003DMG400030104	RNA polymerase, Rpb5, N-terminal||Archaeal RpoH /eukaryotic RPB5 RNA polymerase subunit||DNA-directed RNA polymerase, RPB5 subunit||RNA polymerase, subunit H/Rpb5 C-terminal
PGSC0003DMG400030134	Mlo-related protein
PGSC0003DMG400030153	Ribosomal protein L18a||50S ribosomal protein L18Ae/60S ribosomal protein L20 and L18a||Ribosomal protein L18a/LX
PGSC0003DMG400030174	CDPK adapter protein 1
PGSC0003DMG400030289	Integrase
PGSC0003DMG400030301	Terpenoid cyclases/protein prenyltransferase alpha-alpha toroid
PGSC0003DMG400030304	Multi antimicrobial extrusion protein
PGSC0003DMG400030327	Armadillo-like helical||Pumilio RNA-binding repeat||Nucleic acid binding NABP||Armadillo-type fold
PGSC0003DMG400030343	Protein kinase-like domain||Protein kinase, catalytic domain||Serine-threonine/tyrosine-protein kinase catalytic domain||Tetratricopeptide-like helical
PGSC0003DMG400030376	Multicopper oxidase, type 2||Multicopper oxidase, type 1||Laccase||Multicopper oxidase, type 3||Cupredoxin||Multicopper oxidase, copper-binding site
PGSC0003DMG400030380	RDM4
PGSC0003DMG400030407	Armadillo-like helical||Armadillo||U box domain||Zinc finger, RING/FYVE/PHD-type||Armadillo-type fold
PGSC0003DMG400030443	Protein kinase, ATP binding site||Di-trans-poly-cis-decaprenylcistransferase-like, conserved site||Leucine-rich repeat-containing N-terminal, type 2||Di-trans-poly-cis-decaprenylcistransferase-like||Leucine-rich repeat||Concanavalin A-like lectin/glucanase, subgroup||Protein kinase-like domain||Protein kinase, catalytic domain||Serine/threonine-protein kinase, active site
PGSC0003DMG400030454	UDP-glucuronosyl/UDP-glucosyltransferase
PGSC0003DMG400030492	Mitogen-activated protein (MAP) kinase, conserved site||Protein kinase, catalytic domain||Protein kinase-like domain||Serine/threonine- / dual-specificity protein kinase, catalytic domain||Protein kinase, ATP binding site
PGSC0003DMG400030510	Conserved gene of unknown function
PGSC0003DMG400030516	Cyclin-D1-binding protein 1
PGSC0003DMG400030518	Protein of unknown function DUF716, TMEM45
PGSC0003DMG400030526	Pentatricopeptide repeat-containing protein
PGSC0003DMG400030527	ATP-NAD kinase, PpnK-type||Zinc finger, CCHC-type
PGSC0003DMG400030530	Peptidase C26||Class I glutamine amidotransferase-like
PGSC0003DMG400030535	Protein kinase, catalytic domain||Serine/threonine-protein kinase, active site||Protein kinase, ATP binding site||Protein kinase-like domain
PGSC0003DMG400030536	Serine/threonine-protein kinase, active site||Protein kinase, catalytic domain||Concanavalin A-like lectin/glucanase, subgroup||Protein kinase-like domain||Protein kinase, ATP binding site
PGSC0003DMG400030543	Gene of unknown function
PGSC0003DMG400030547	Armadillo-like helical||Armadillo||U box domain||Armadillo-type fold||Zinc finger, RING/FYVE/PHD-type
PGSC0003DMG400030550	Protein of unknown function DUF3326
PGSC0003DMG400030559	Riboflavin synthase-like beta-barrel||Ferredoxin reductase-type FAD-binding domain||Oxidoreductase FAD/NAD(P)-binding||Phenol hydroxylase reductase
PGSC0003DMG400030566	GINS complex||GINS complex, subunit Psf3
PGSC0003DMG400030571	Zinc finger, RING/FYVE/PHD-type||Zinc finger, RING-type
PGSC0003DMG400030573	Reticulon
PGSC0003DMG400030575	Protein of unknown function DUF789
PGSC0003DMG400030613	Neurolysin/Thimet oligopeptidase, domain 2||Neurolysin/Thimet oligopeptidase, N-terminal||Metallopeptidase, catalytic domain||Peptidase M3A/M3B
PGSC0003DMG400030626	Serine-threonine/tyrosine-protein kinase catalytic domain||Leucine rich repeats (2 copies)||Protein kinase-like domain||Protein kinase, ATP binding site||Leucine-rich repeat-containing N-terminal, type 2||Protein kinase, catalytic domain||Serine/threonine-protein kinase, active site
PGSC0003DMG400030654	GDP-L-galactose/GDP-D-glucose phosphorylase
PGSC0003DMG400030710	P-loop containing nucleoside triphosphate hydrolase||AIG1||Domain of unknown function DUF3406, chloroplast translocase||Chloroplast protein import component Toc86/159
PGSC0003DMG400030714	Zinc finger, C3HC4 RING-type||Zinc finger, RING/FYVE/PHD-type||Zinc finger, RING-type
PGSC0003DMG400030734	Conserved gene of unknown function
PGSC0003DMG400030735	Zinc finger, RING-type||Zinc finger, RING/FYVE/PHD-type
PGSC0003DMG400030737	Homeobox KN domain||ELK||KNOX1||KNOX2||Homeodomain||Homeodomain-like
PGSC0003DMG400030788	Oxoglutarate/iron-dependent dioxygenase||Prolyl 4-hydroxylase, alpha subunit||Metridin-like ShK toxin
PGSC0003DMG400030792	TMS membrane protein/tumour differentially expressed protein
PGSC0003DMG400030851	ClpP||ClpP/TepA||ClpP/crotonase-like domain||ClpP, active site
PGSC0003DMG400030865	Mob1/phocein
PGSC0003DMG400030880	RNA polymerase Rpb2, domain 3||RNA polymerase Rpb2, domain 2||RNA polymerase Rpb2, domain 4||DNA-directed RNA polymerase, subunit 2, domain 6||DNA-directed RNA polymerase, subunit 2||RNA polymerase Rpb2, OB-fold||RNA polymerase Rpb2, domain 5||RNA polymerase Rpb2, domain 7||RNA polymerase, beta subunit, conserved site||RNA polymerase, beta subunit, protrusion
PGSC0003DMG400030890	Aldolase-type TIM barrel||NADH:flavin oxidoreductase/NADH oxidase, N-terminal
PGSC0003DMG400030894	Protein kinase-like domain||Concanavalin A-like lectin/glucanase, subgroup||Protein kinase, ATP binding site||Protein kinase, catalytic domain||Serine/threonine-protein kinase, active site||Serine-threonine/tyrosine-protein kinase catalytic domain
PGSC0003DMG400030899	Epsin-like, N-terminal||Clathrin adaptor, phosphoinositide-binding, GAT-like||ANTH||ENTH/VHS
PGSC0003DMG400030907	Tetratricopeptide TPR-1||Tetratricopeptide-like helical
PGSC0003DMG400030908	Armadillo-type fold||Rap1-interacting factor 1 N-terminal||Rif1
PGSC0003DMG400030911	Ubiquitin system component Cue||UBA-like
PGSC0003DMG400030939	Integrase core domain containing protein
PGSC0003DMG400030951	Molybdenum cofactor biosynthesis, MoeB||Ubiquitin-activating enzyme repeat||Ubiquitin/SUMO-activating enzyme ubiquitin-like domain||Ubiquitin-activating enzyme||UBA/THIF-type NAD/FAD binding fold||Ubiquitin-like 1 activating enzyme, catalytic cysteine domain||NAD(P)-binding domain
PGSC0003DMG400030952	P-loop containing nucleoside triphosphate hydrolase||Helicase, superfamily 1/2, ATP-binding domain||Helicase, C-terminal||SNF2-related
PGSC0003DMG400030961	Homeodomain-like||POX||Homeodomain||Homeobox KN domain
PGSC0003DMG400030997	Nucleic acid-binding, OB-fold
PGSC0003DMG400031017	Peptidase M48
PGSC0003DMG400031041	1-aminocyclopropane-1-carboxylate deaminase/D-cysteine desulfhydrase||Tryptophan synthase beta subunit-like PLP-dependent enzymes superfamily||Pyridoxal phosphate-dependent deaminase
PGSC0003DMG400031063	Lactate/malate dehydrogenase, C-terminal||Lactate dehydrogenase/glycoside hydrolase, family 4, C-terminal||Malate dehydrogenase, NADP-dependent, plants||Malate dehydrogenase, type 2||NAD(P)-binding domain||Lactate/malate dehydrogenase, N-terminal||Malate dehydrogenase, active site
PGSC0003DMG400031065	AmbAllergen||Pectate lyase/Amb allergen||Pectin lyase fold||Pectin lyase fold/virulence factor||Parallel beta-helix repeat
PGSC0003DMG400031071	No apical meristem (NAM) protein
PGSC0003DMG400031075	Protein of unknown function DUF1635
PGSC0003DMG400031083	P-loop containing nucleoside triphosphate hydrolase||Small GTPase superfamily, Rab type||Small GTP-binding protein domain||Small GTPase superfamily
PGSC0003DMG400031087	Uncharacterised protein family UPF0497, trans-membrane plant||Uncharacterised protein family UPF0497, trans-membrane plant subgroup
PGSC0003DMG400031100	Zinc finger, C3HC-like||-
PGSC0003DMG400031103	Concanavalin A-like lectin/glucanase, subgroup||Protein kinase-like domain||Leucine-rich repeat-containing N-terminal, type 2||Protein kinase, catalytic domain||Serine/threonine-protein kinase, active site||Leucine-rich repeat
PGSC0003DMG400031111	RNA polymerase sigma-70 region 4||RNA polymerase sigma-70||RNA polymerase sigma factor, SigB/SigC/SigD, plastid||RNA polymerase sigma factor, region 2||RNA polymerase sigma-70 factor||RNA polymerase sigma-70 region 2||RNA polymerase sigma-70 region 3||RNA polymerase sigma-70 region 1.2||Winged helix-turn-helix transcription repressor DNA-binding||RNA polymerase sigma factor, region 3/4
PGSC0003DMG400031115	Domain of unknown function DUF239||Domain of unknown function DUF4409
PGSC0003DMG400031130	Metallo-dependent phosphatase-like||Serine/threonine-specific protein phosphatase/bis(5-nucleosyl)-tetraphosphatase||Metallophosphoesterase domain
PGSC0003DMG400031154	Pseudouridine synthase I, TruA, N-terminal||Pseudouridine synthase, catalytic domain||Pseudouridine synthase I, TruA||Pseudouridine synthase I, TruA, alpha/beta domain||Pseudouridine synthase I, TruA, C-terminal
PGSC0003DMG400031187	Esterase, SGNH hydrolase-type, subgroup||Lipase, GDSL
PGSC0003DMG400031250	Hydroxymethylglutaryl-CoA lyase, active site||Hydroxymethylglutaryl-CoA lyase||Pyruvate carboxyltransferase||Aldolase-type TIM barrel
PGSC0003DMG400031257	Ribosomal protein L34Ae||Protein of unknown function DUF1666
PGSC0003DMG400031270	CAAX amino terminal protease
PGSC0003DMG400031289	Peptidase C19, ubiquitin carboxyl-terminal hydrolase 2||Ubiquitin carboxyl-terminal hydrolase-like domain||Zinc finger, RING/FYVE/PHD-type||Zinc finger, UBP-type||Peptidase C19, ubiquitin carboxyl-terminal hydrolase 2, conserved site
PGSC0003DMG400031299	Homeodomain-like||Myb domain, plants||MYB-CC type transcription factor, LHEQLE-containing domain||SANT/Myb domain||Myb domain
PGSC0003DMG400031339	Calponin homology domain
PGSC0003DMG400031347	Amino acid transporter, transmembrane
PGSC0003DMG400031371	Replication fork protection component Swi3||Zinc finger, CCHC-type
PGSC0003DMG400031498	Conserved gene of unknown function
PGSC0003DMG400031522	Tetratricopeptide-like helical||Tetratricopeptide repeat||Tetratricopeptide repeat-containing domain||Peptidyl-prolyl cis-trans isomerase, FKBP-type||Elongated TPR repeat-containing domain||Peptidyl-prolyl cis-trans isomerase, FKBP-type, domain
PGSC0003DMG400031553	S-adenosyl-L-methionine-dependent methyltransferase-like||Ribosomal RNA large subunit methyltransferase E||Ribosomal RNA methyltransferase, Spb1, C-terminal||Ribosomal RNA methyltransferase Spb1, domain of unknown function DUF3381||Ribosomal RNA methyltransferase FtsJ domain||AdoMet-dependent rRNA methyltransferase, Spb1
PGSC0003DMG400031733	RNA-binding S4 domain||Pseudouridine synthase, RluC/RluD, conserved site||Pseudouridine synthase, catalytic domain||Pseudouridine synthase, RsuA/RluB/C/D/E/F
PGSC0003DMG400031798	Protein of unknown function DUF789
PGSC0003DMG400031817	-||HD/PDEase domain||TGS||Beta-grasp domain||TGS-like||RelA/SpoT
PGSC0003DMG400031826	Drought induced 19/ RING finger protein 114
PGSC0003DMG400031827	Conserved gene of unknown function
PGSC0003DMG400031833	SNARE associated Golgi protein
PGSC0003DMG400031860	Serine/threonine-protein kinase, active site||Protein kinase, catalytic domain||Concanavalin A-like lectin/glucanase, subgroup||Protein kinase-like domain||Epidermal growth factor-like domain||Bulb-type lectin domain||Protein kinase, ATP binding site||S-locus glycoprotein
PGSC0003DMG400031867	Adenine nucleotide translocator 1||Mitochondrial carrier domain||Mitochondrial carrier protein||Mitochondrial substrate/solute carrier
PGSC0003DMG400031876	Conserved gene of unknown function
PGSC0003DMG400031894	Gene of unknown function
PGSC0003DMG400032078	Gene of unknown function
PGSC0003DMG400032102	Metridin-like ShK toxin||Oxoglutarate/iron-dependent dioxygenase||Prolyl 4-hydroxylase, alpha subunit
PGSC0003DMG400032110	Protein phosphatase 2C-like||Protein phosphatase 2C||Protein phosphatase 2C, manganese/magnesium aspartate binding site
PGSC0003DMG400032120	Protein of unknown function DUF677
PGSC0003DMG400032135	Acid phosphatase/vanadium-dependent haloperoxidase-related
PGSC0003DMG400032136	Lipase/lipooxygenase, PLAT/LH2||Lipoxygenase, LH2
PGSC0003DMG400032138	Galactose oxidase, beta-propeller||Kelch repeat type 1||F-box domain, cyclin-like
PGSC0003DMG400032140	K Homology domain, type 1||TonB box, conserved site||K Homology domain
PGSC0003DMG400032145	Ribonuclease P/MRP protein subunit
PGSC0003DMG400032146	P-loop containing nucleoside triphosphate hydrolase||Formate-tetrahydrofolate ligase, FTHFS||Formate-tetrahydrofolate ligase, FTHFS, conserved site
PGSC0003DMG400032147	Haem peroxidase, plant/fungal/bacterial||Peroxidases heam-ligand binding site||Plant peroxidase||Haem peroxidase||Peroxidase, active site
PGSC0003DMG400032149	Plastid lipid-associated protein/fibrillin conserved domain
PGSC0003DMG400032151	Zinc finger, RING/FYVE/PHD-type||Armadillo-type fold||U box domain
PGSC0003DMG400032153	Alpha/beta hydrolase fold-5||Alpha/Beta hydrolase fold
PGSC0003DMG400032154	Alcohol dehydrogenase superfamily, zinc-type||GroES-like||Alcohol dehydrogenase, zinc-type, conserved site||Alcohol dehydrogenase GroES-like||NAD(P)-binding domain||Alcohol dehydrogenase, C-terminal
PGSC0003DMG400032157	Oxoglutarate/iron-dependent dioxygenase||Isopenicillin N synthase-like
PGSC0003DMG400032180	Metallo-dependent phosphatase-like||Metallophosphoesterase domain||Serine/threonine-specific protein phosphatase/bis(5-nucleosyl)-tetraphosphatase
PGSC0003DMG400032181	Protein of unknown function DUF538
PGSC0003DMG400032189	Cation efflux protein||Cation efflux protein cytoplasmic domain||Cation efflux protein transmembrane domain
PGSC0003DMG400032202	Vacuolar protein sorting-associate Vta1, N-terminal||1,3-beta-glucan synthase subunit FKS1-like, domain-1||Glycosyl transferase, family 48||Callose synthase
PGSC0003DMG400032206	Tetratricopeptide-like helical||Pentatricopeptide repeat
PGSC0003DMG400032242	Protein kinase-like domain||Serine/threonine-protein kinase, active site||Protein kinase, catalytic domain||Serine-threonine/tyrosine-protein kinase catalytic domain
PGSC0003DMG400032246	Inositol polyphosphate-related phosphatase||Endonuclease/exonuclease/phosphatase
PGSC0003DMG400032263	Calmodulin protein kinase
PGSC0003DMG400032483	DNA binding protein
PGSC0003DMG400032498	Concanavalin A-like lectin/glucanase, subgroup||Protein kinase-like domain||Protein kinase, ATP binding site||Serine/threonine-protein kinase, active site||Protein kinase, catalytic domain||Serine-threonine/tyrosine-protein kinase catalytic domain
PGSC0003DMG400032510	Cupredoxin||Multicopper oxidase, copper-binding site||Multicopper oxidase, type 3||L-ascorbate oxidase, plants||Multicopper oxidase, type 2||Multicopper oxidase, type 1
PGSC0003DMG400032530	Bet v I domain||START-like domain
PGSC0003DMG400032539	Protein of unknown function DUF3067
PGSC0003DMG400032542	Isopenicillin N synthase-like||Zinc finger, RING/FYVE/PHD-type
PGSC0003DMG400032544	Thioredoxin-like fold||mRNA splicing factor, thioredoxin-like U5 snRNP
PGSC0003DMG400032558	Zinc finger, PHD-type, conserved site||Zinc finger, RING/FYVE/PHD-type||Zinc finger, FYVE/PHD-type
PGSC0003DMG400032562	ClpP, active site||ClpP/crotonase-like domain||ClpP||ClpP/TepA
PGSC0003DMG400032816	Zinc finger, RING/FYVE/PHD-type||Zinc finger, RING-type
PGSC0003DMG400032817	Squamosa promoter-binding protein||Transcription factor, SBP-box
PGSC0003DMG400032834	Gene of unknown function
PGSC0003DMG400033047	No apical meristem (NAM) protein
PGSC0003DMG400033058	Conserved gene of unknown function
PGSC0003DMG400033060	AGC-kinase, C-terminal||Serine/threonine-protein kinase, active site||Protein kinase, catalytic domain||Protein kinase-like domain||Protein kinase, C-terminal||Protein kinase, ATP binding site||Serine/threonine- / dual-specificity protein kinase, catalytic domain
PGSC0003DMG400033065	Glucose/Sorbosone dehydrogenase||Six-bladed beta-propeller, TolB-like||Soluble quinoprotein glucose/sorbosone dehydrogenase
PGSC0003DMG400033090	Gene of unknown function
PGSC0003DMG400033134	Tetratricopeptide-like helical
PGSC0003DMG400033335	Protein kinase, catalytic domain||Serine/threonine-protein kinase, active site||Serine/threonine- / dual-specificity protein kinase, catalytic domain||Protein kinase-like domain||EF-Hand 1, calcium-binding site||EF-hand-like domain||Protein kinase, ATP binding site||Calcium-binding EF-hand
PGSC0003DMG400033350	Gene of unknown function
PGSC0003DMG400033360	Exostosin-like
PGSC0003DMG400033572	Peptidase C48, SUMO/Sentrin/Ubl1
PGSC0003DMG400033580	HAD-like domain||Magnesium-dependent phosphatase-1, eukaryotic/arcaheal type||Magnesium-dependent phosphatase-1, eukaryotic type||HAD-superfamily phosphatase, subfamily IIIC
PGSC0003DMG400033631	Conserved gene of unknown function
PGSC0003DMG400033879	GH3 auxin-responsive promoter
PGSC0003DMG400033883	Lipase, GDSL||Esterase, SGNH hydrolase-type, subgroup
PGSC0003DMG400033905	NAD(P)-binding domain||NmrA-like
PGSC0003DMG400033906	NAD(P)-binding domain||NmrA-like
PGSC0003DMG400033909	TB2/DP1/HVA22-related protein
PGSC0003DMG400033911	C-CAP/cofactor C-like domain||Adenylate cyclase-associated CAP, N-terminal||CAP, conserved site||CARP motif||Adenylate cyclase-associated CAP||Cyclase-associated protein CAP/septum formation inhibitor MinC, C-terminal||Adenylate cyclase-associated CAP, C-terminal
PGSC0003DMG400034310	Transcription factor, SBP-box
PGSC0003DMG400034379	'chromo' domain containing protein?
PGSC0003DMG400034381	Gene of unknown function
PGSC0003DMG400034418	Gene of unknown function
PGSC0003DMG400034420	EPIDERMAL PATTERNING FACTOR 3
PGSC0003DMG400034444	ADC synthase
PGSC0003DMG400034488	Gene of unknown function
PGSC0003DMG400034509	Integrase core domain containing protein
PGSC0003DMG400034558	Gene of unknown function?
PGSC0003DMG400034631	Gene of unknown function
PGSC0003DMG400034665	Integrase core domain containing protein
PGSC0003DMG400034770	Zinc finger, CCHC-type||Peptidase aspartic||Retroviral aspartyl protease
PGSC0003DMG400034780	Ankyrin repeat-containing domain||PapD-like||Major sperm protein||Ankyrin repeat
PGSC0003DMG400034784	Gene of unknown function
PGSC0003DMG400034813	RRNA intron-encoded homing endonuclease
PGSC0003DMG400034864	Integrase core domain containing protein
PGSC0003DMG400034873	Gene of unknown function
PGSC0003DMG400034885	Conserved gene of unknown function
PGSC0003DMG400035039	Integrase core domain containing protein
PGSC0003DMG400035096	Integrase core domain containing protein
PGSC0003DMG400035128	P-loop containing nucleoside triphosphate hydrolase
PGSC0003DMG400035133	Gene of unknown function
PGSC0003DMG400035136	Conserved gene of unknown function
PGSC0003DMG400035145	Integrase core domain containing protein
PGSC0003DMG400035224	Integrase core domain containing protein
[truncated: 551 more rows]
